# Supplementary material for: Novel amphiphilic pyridinium ionic liquids-supported Schiff bases: ultrasound assisted synthesis, molecular docking and anticancer evaluation
Source: PubMed Central journal article supplement (PMC6768046; doi:10.1186/s13065-018-0489-z), 2018-11-22
Supplement: 13065_2018_489_MOESM1_ESM.pdf [file 13065_2018_489_MOESM1_ESM.pdf]

# Novel Amphiphilic Pyridinium Ionic Liquids-Supported Schiff Bases. Ultrasound Assisted Synthesis, Molecular Docking and Anticancer Evaluation

Fawzia Faleh Al-Blewi<sup>1</sup>, Nadjat Rezki<sup>1,2,\*</sup>, Salsabeel Abdullah Al-Sodies<sup>1</sup>, Sanaa K. Bardaweel<sup>3</sup>, Dima A. Sabbah<sup>4</sup>, Mouslim Messali<sup>1</sup> and Mohamed Reda Aouad<sup>1,\*</sup>

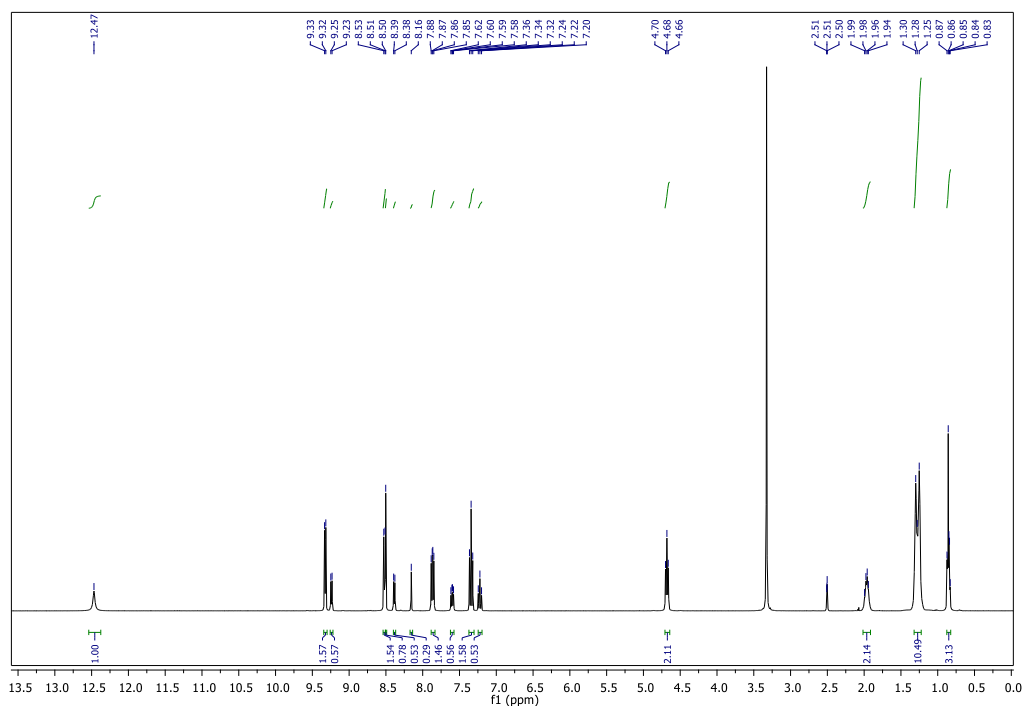

Figure S1. <sup>1</sup>H NMR of Compound 2.

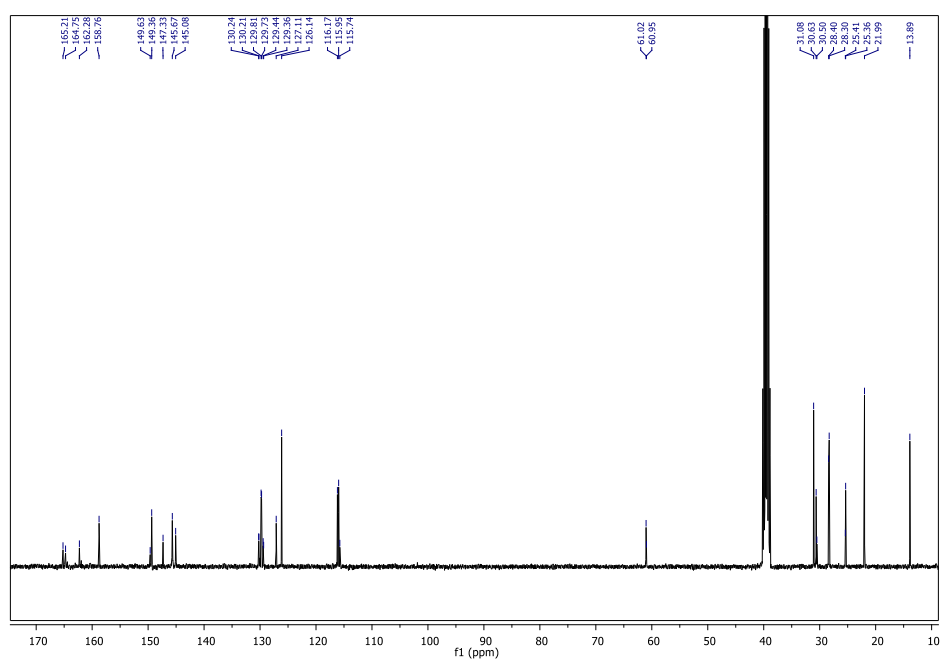

Figure S2. <sup>13</sup>C NMR of Compound 2

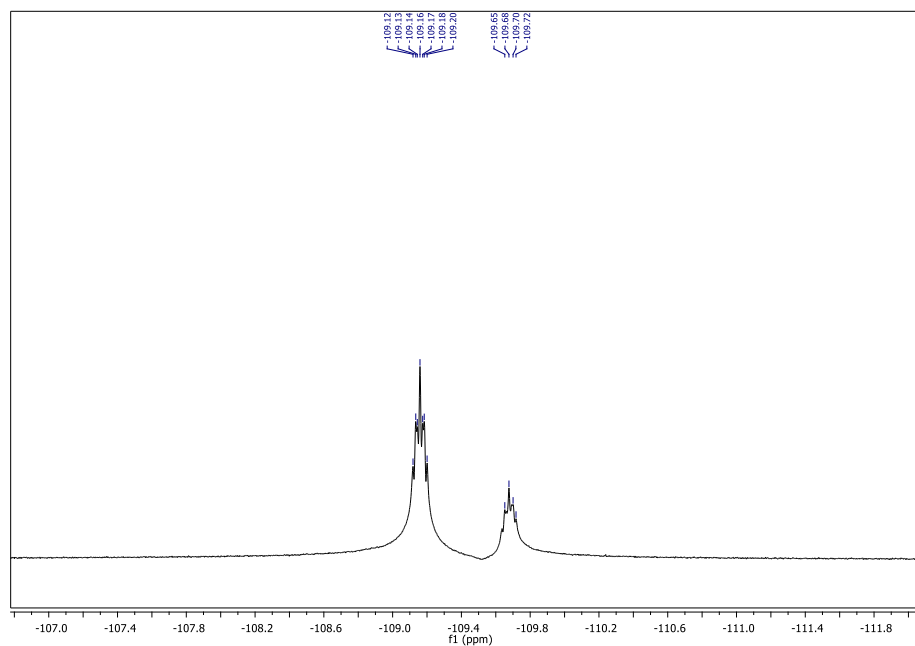

Figure S3. <sup>19</sup>F NMR of Compound 2

Line#:1 R.Time:4.6(Scan#:549)  
 MassPeaks:244  
 RawMode:Single 4.6(549) BasePeak:57(24520)  
 BG Mode:None Group 1 - Event 1

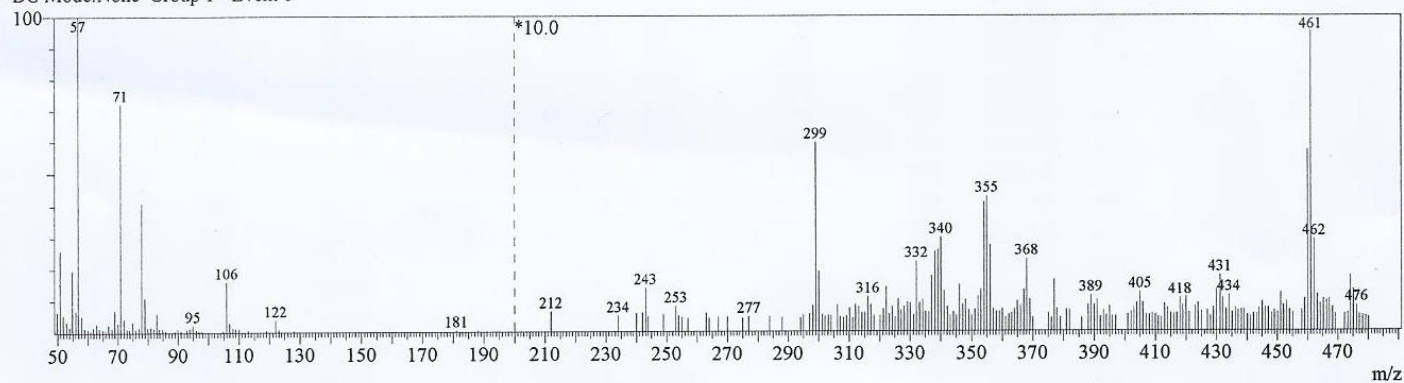

Figure S4. MS (ESI) of Compound 2

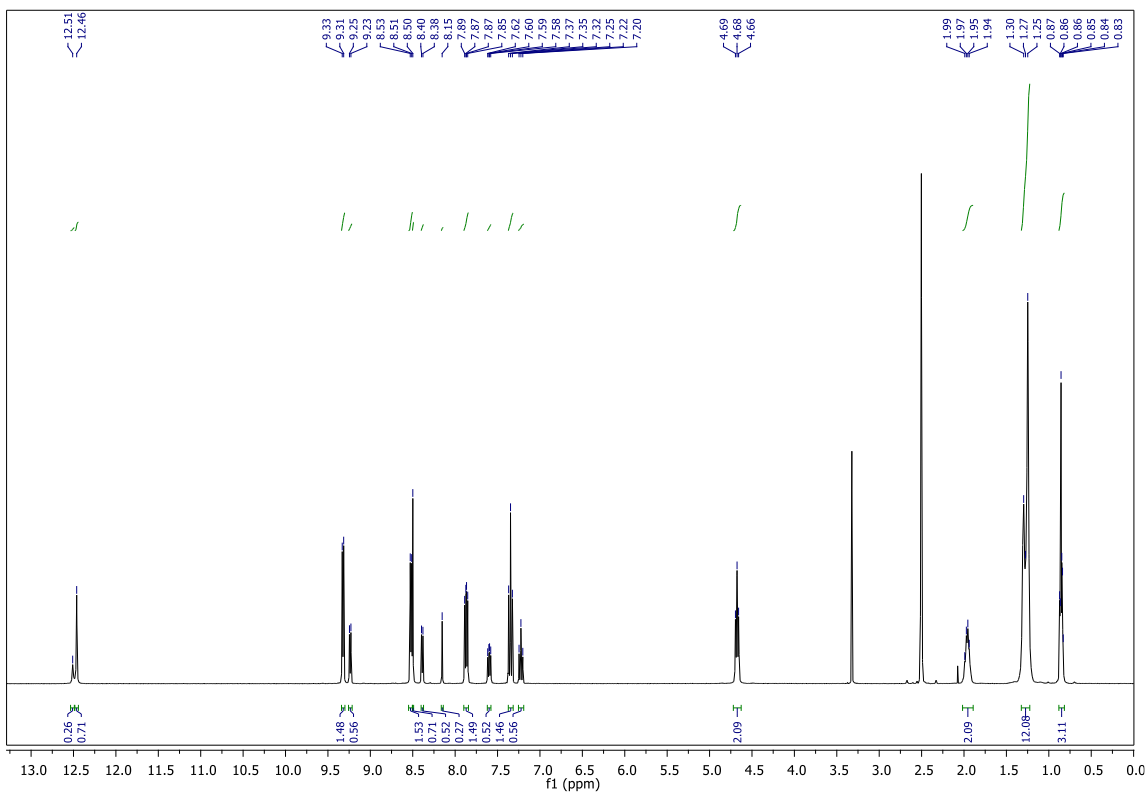

Figure S5. <sup>1</sup>H NMR of Compound 3

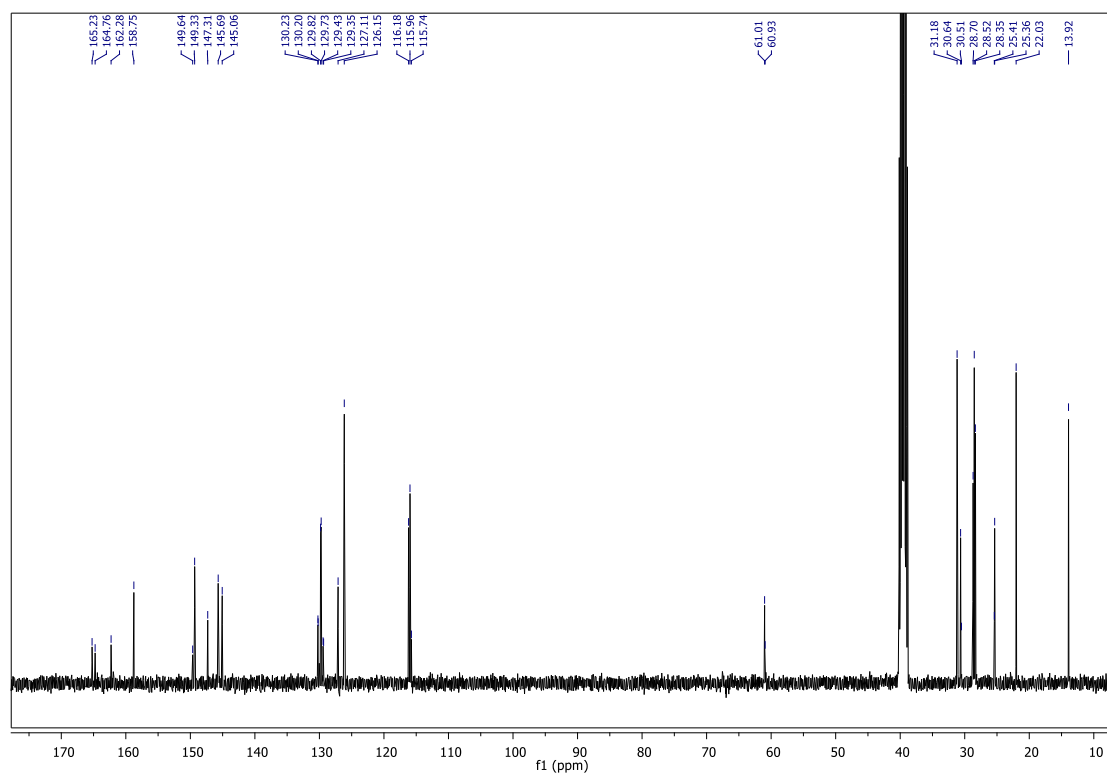

Figure S6. <sup>13</sup>C NMR of Compound 3

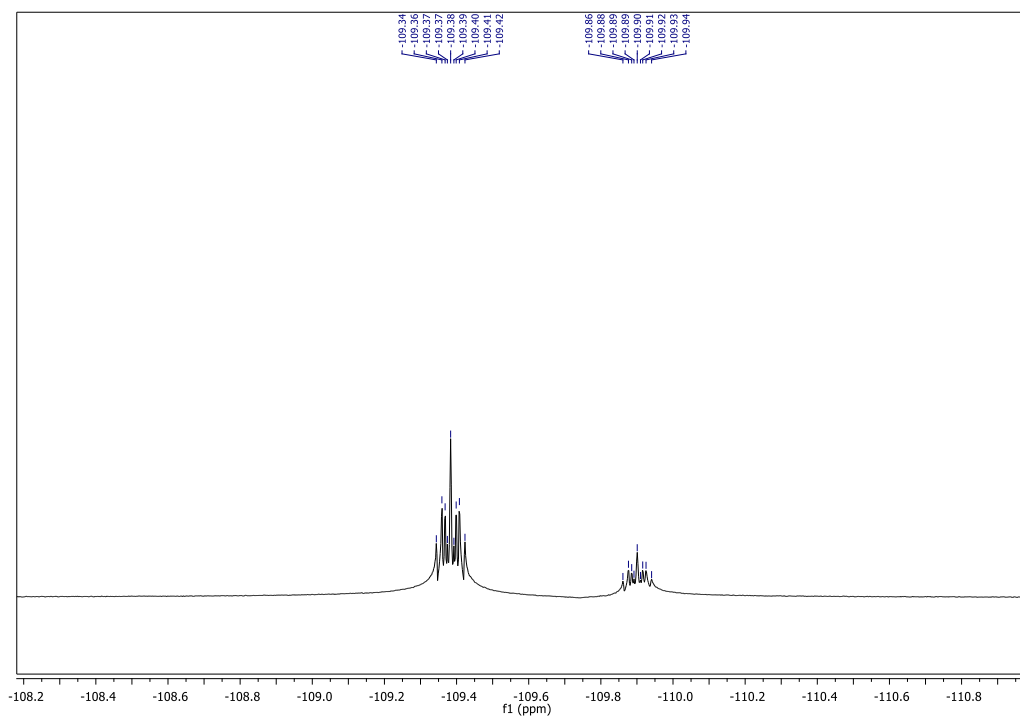

Figure S7.  $^{19}\text{F}$ NMR of Compound 3

Line#:1 R.Time:5.7(Scan#:685)  
 MassPeaks:299  
 RawMode:Single 5.7(685) BasePeak:57(30129)  
 BG Mode:None Group 1 - Event 1

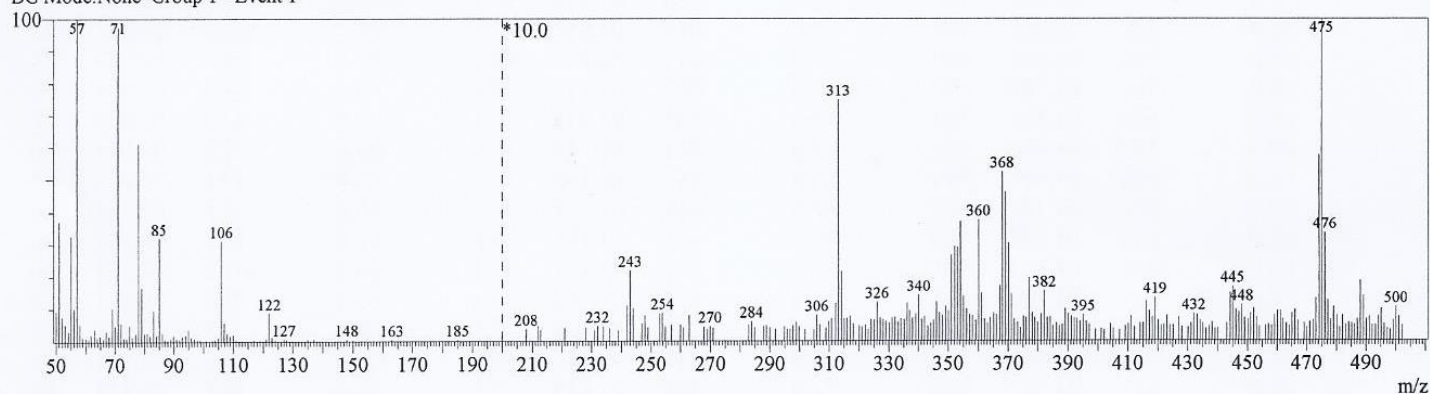

Figure S8. MS (ESI) of Compound 3

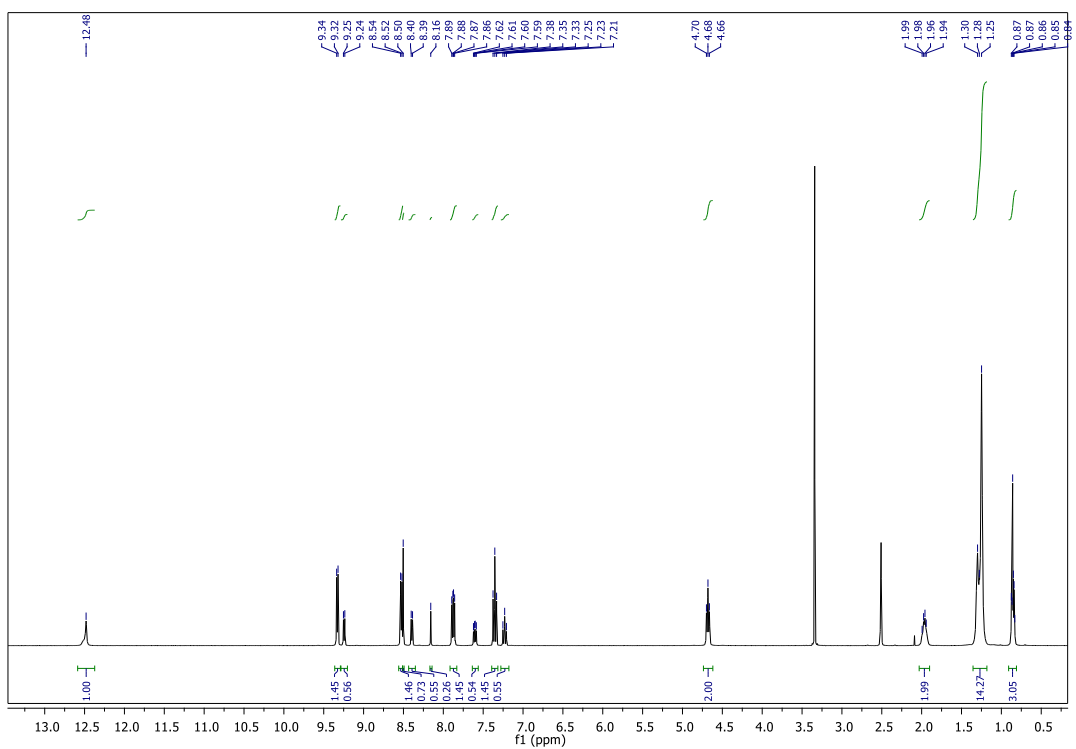

Figure S9. <sup>1</sup>H NMR of Compound 4

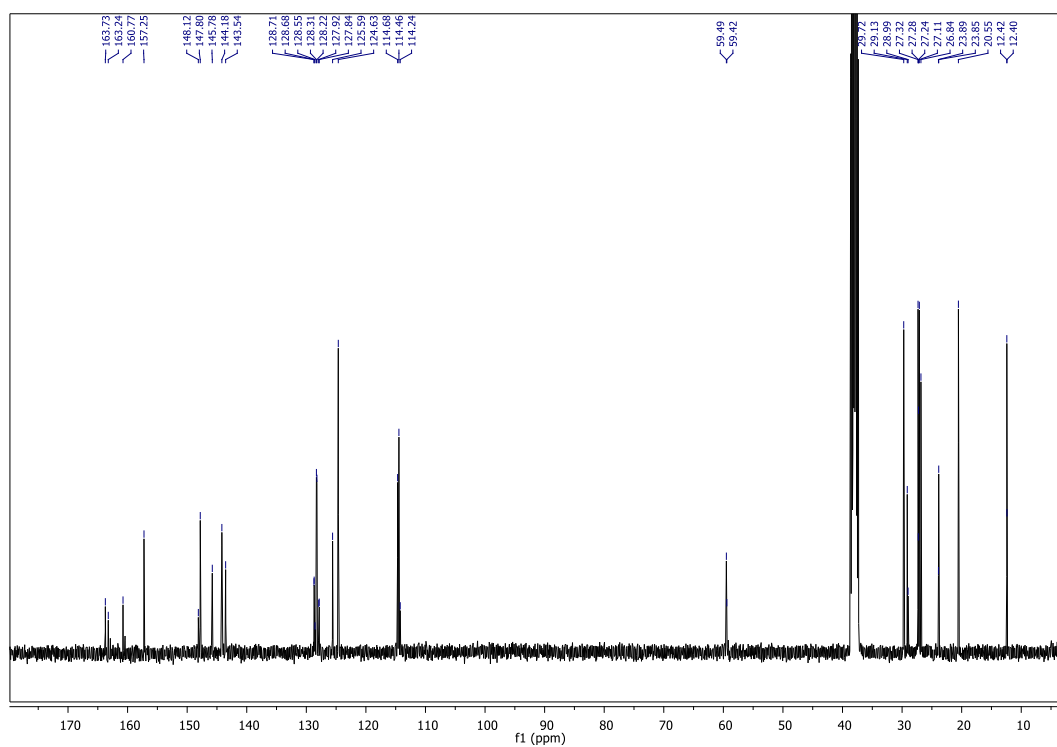

Figure S10. <sup>13</sup>C NMR of Compound 4

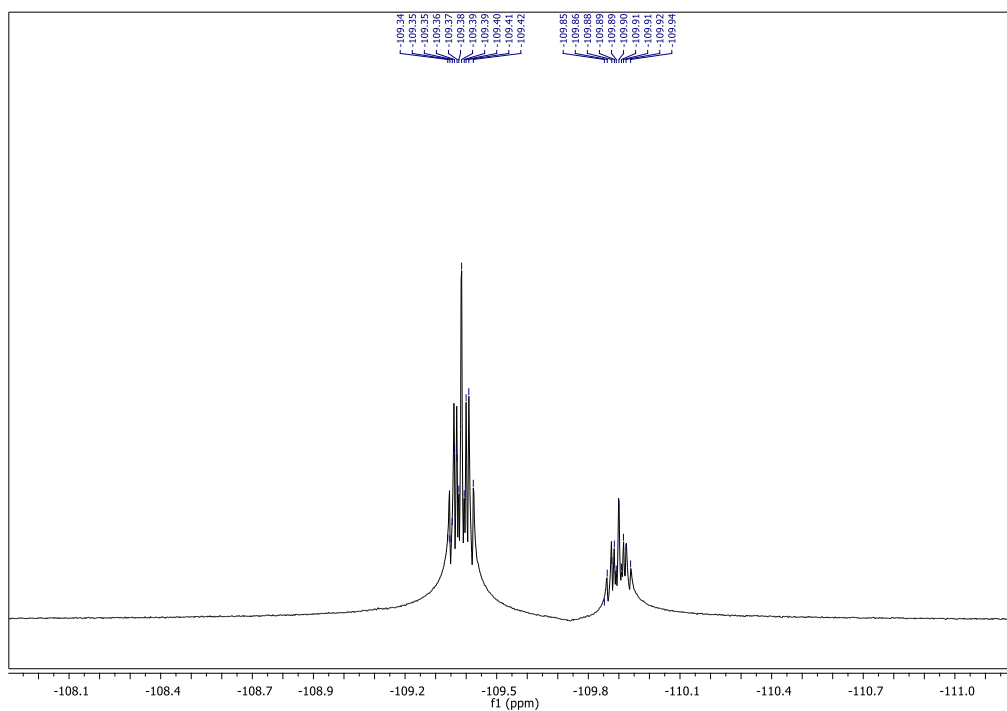

Figure S11.  $^{19}\text{F}$ NMR of Compound 4

Salsabel-S110 #307 RT: 5.15 AV: 1 SB: 273 4.38-6.64, 4.07-6.34 NL: 1.40E5  
 T: (0,0) + c EI Full ms [40.00-1000.00]

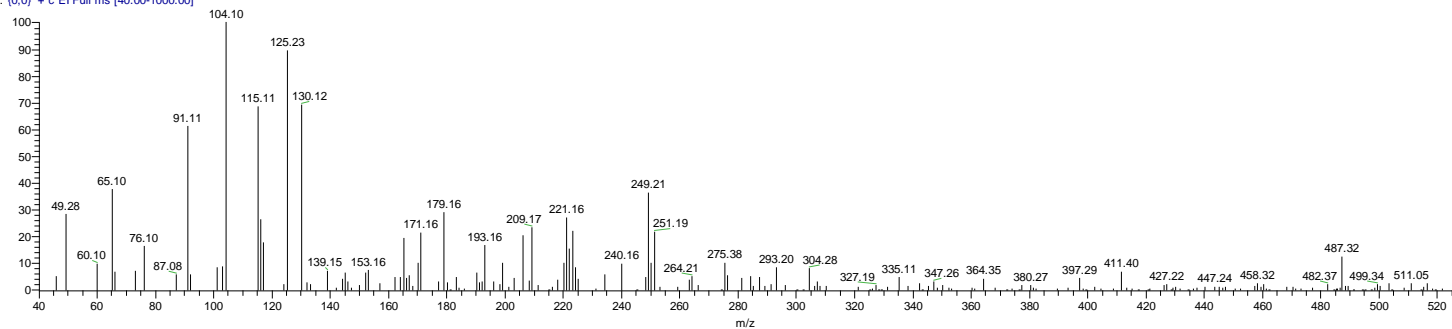

Figure S12. MS (ESI) of Compound 4

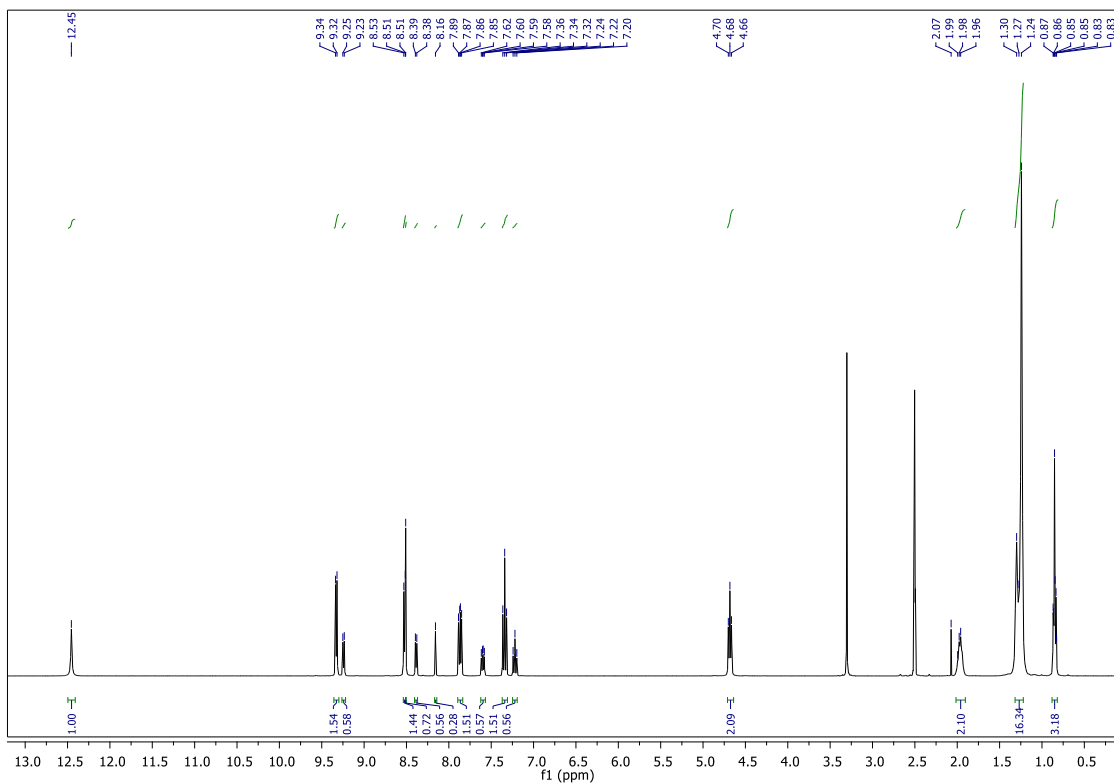

Figure S13. <sup>1</sup>H NMR of Compound 5

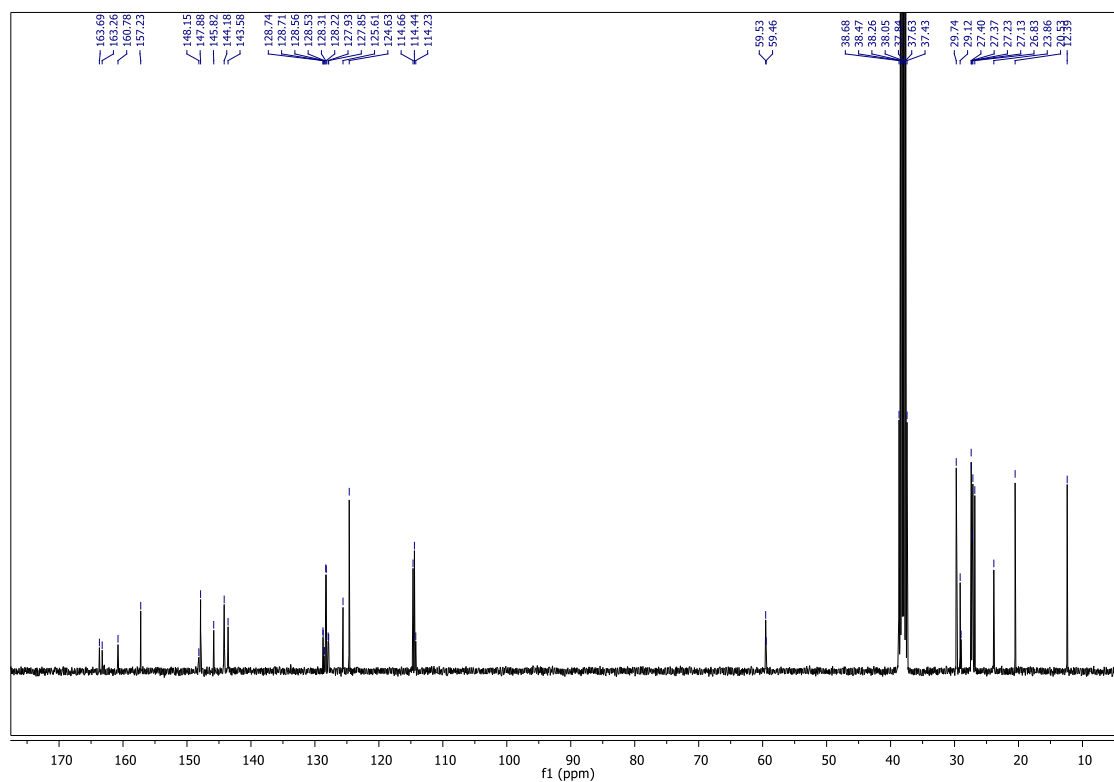

Figure S14. <sup>13</sup>C NMR of Compound 5

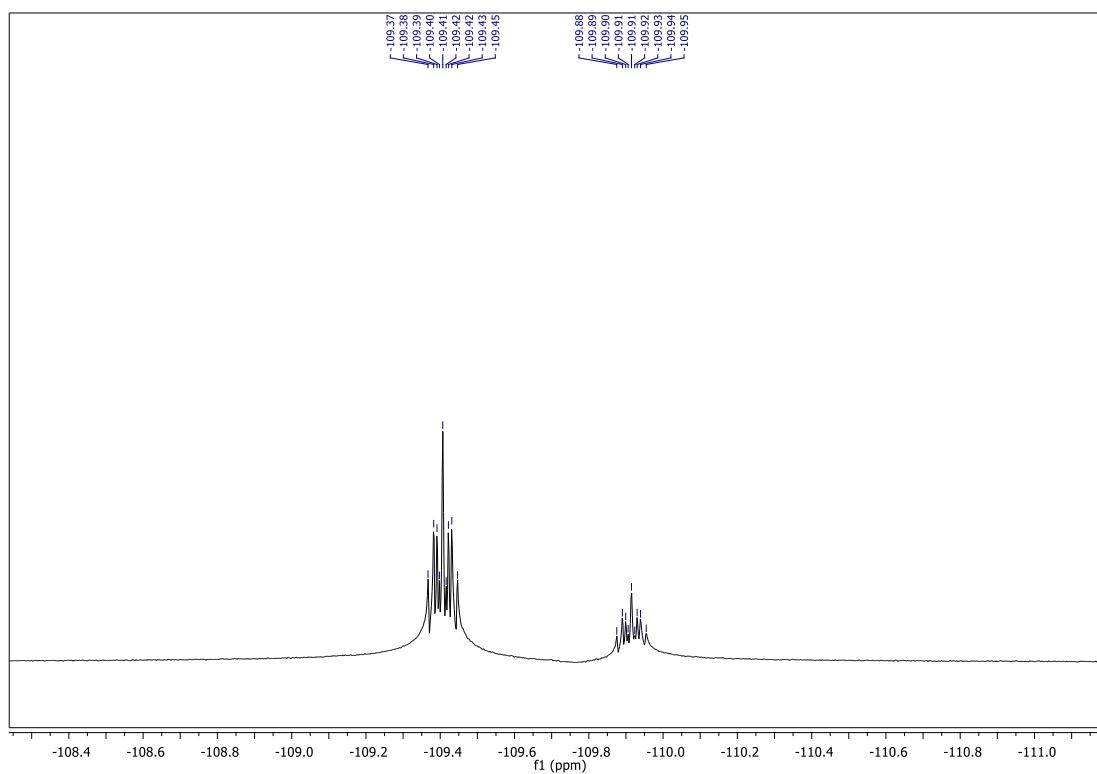

Figure S15.  $^{19}\text{F}$ NMR of Compound 5

Line#:1 R.Time:4.6(Scan#:551)  
MassPeaks:177  
RawMode:Single 4.6(551) BasePeak:57(43391)  
BG Mode:None Group 1 - Event 1

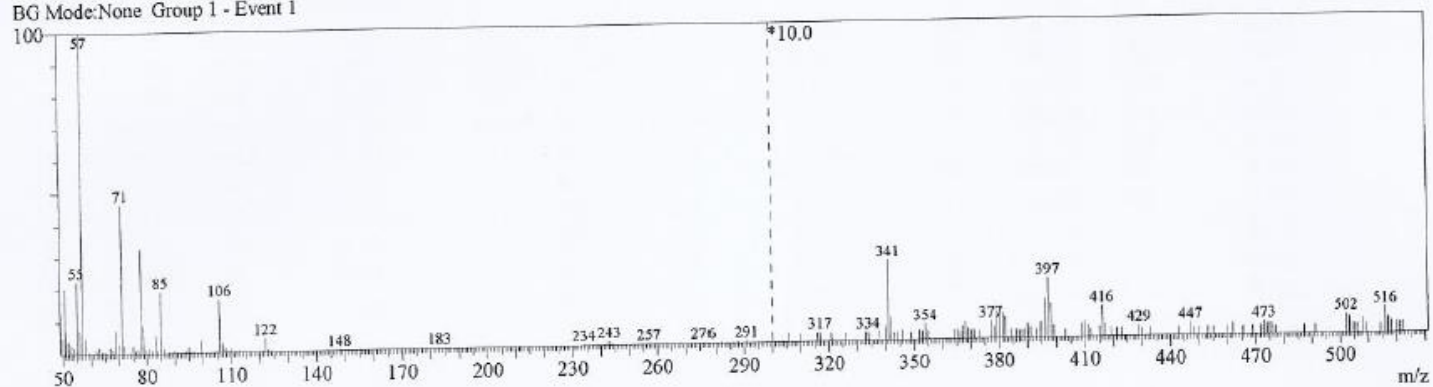

Figure S16. MS (ESI) of Compound 5



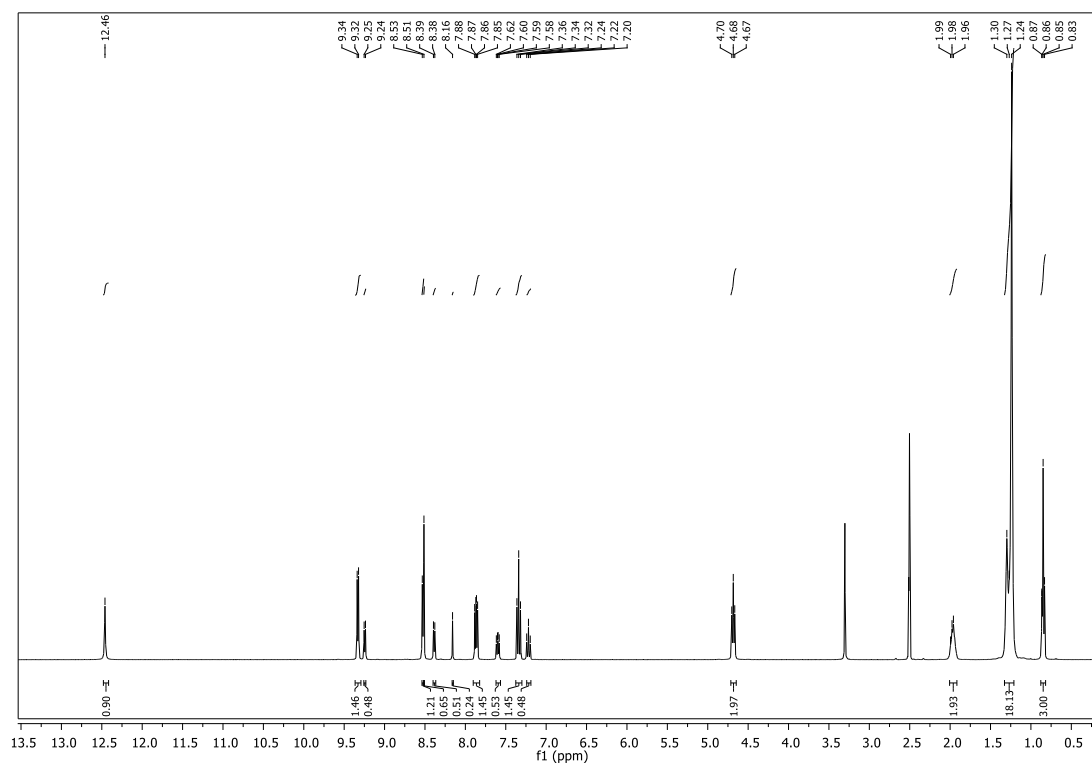

Figure S17. <sup>1</sup>H NMR of Compound 6

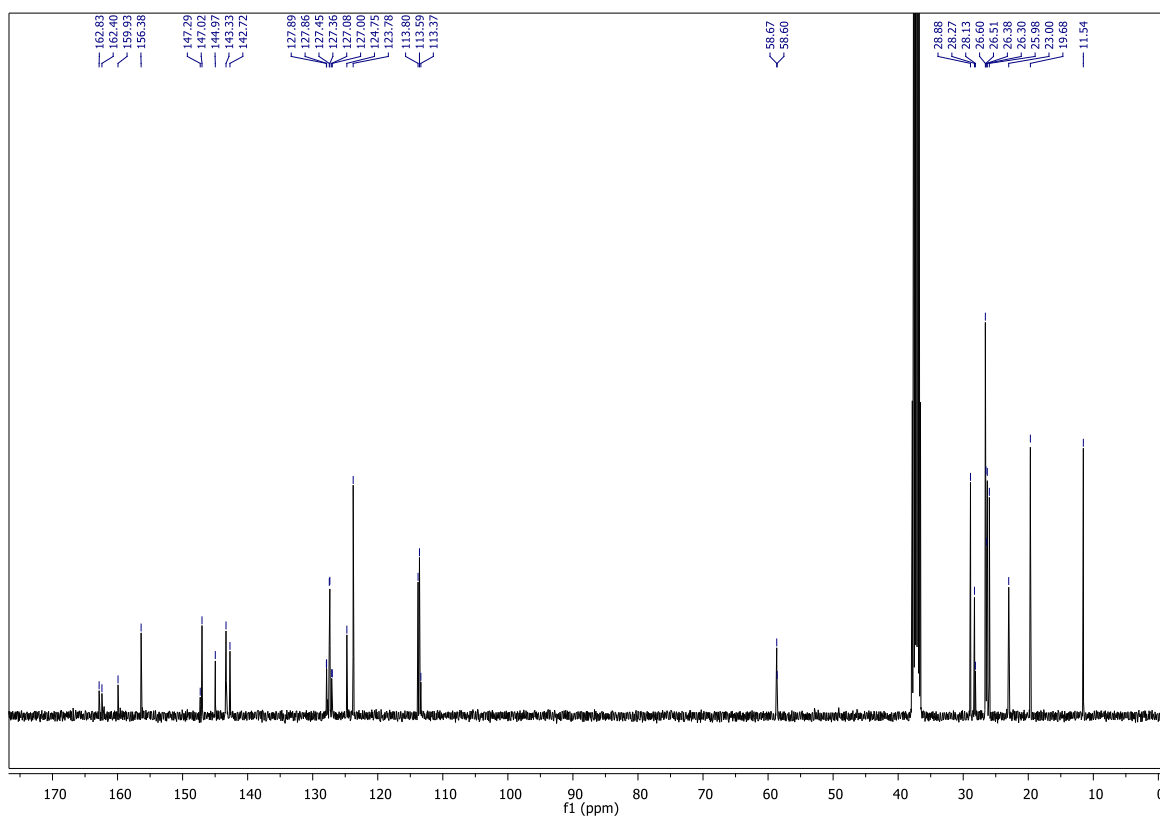

Figure S18. <sup>13</sup>C NMR of Compound 6

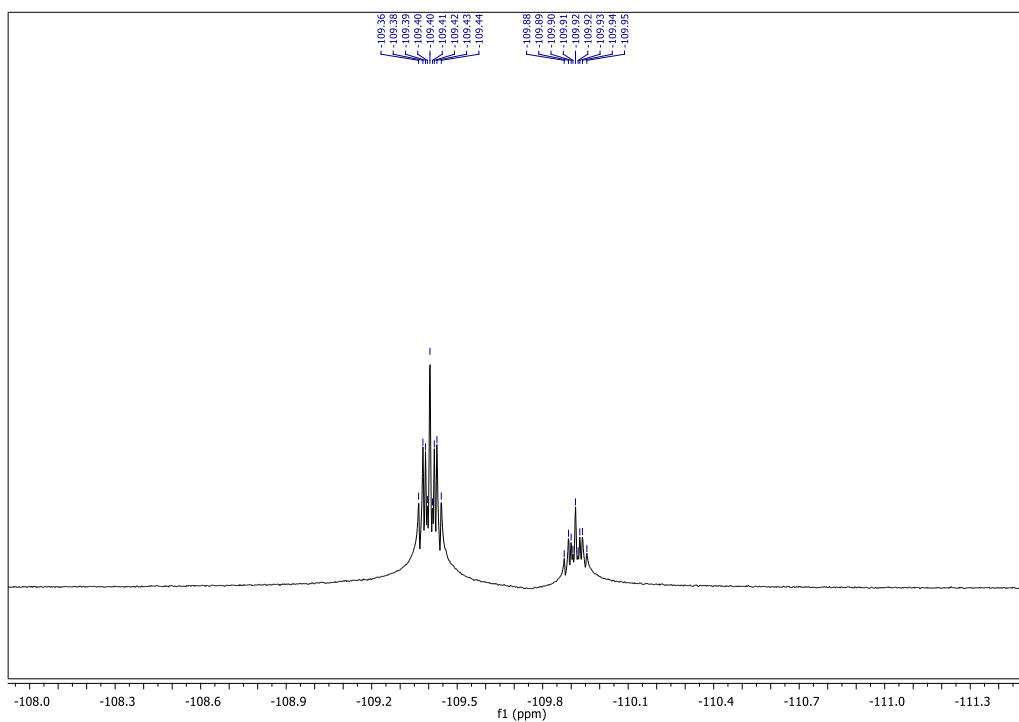

Figure S19.  $^{19}\text{F}$ NMR of Compound 6

Line#:1 R.Time:4.1(Scan#:495)  
MassPeaks:267  
RawMode:Single 4.1(495) BasePeak:57(44346)  
BG Mode:None Group 1 - Event 1

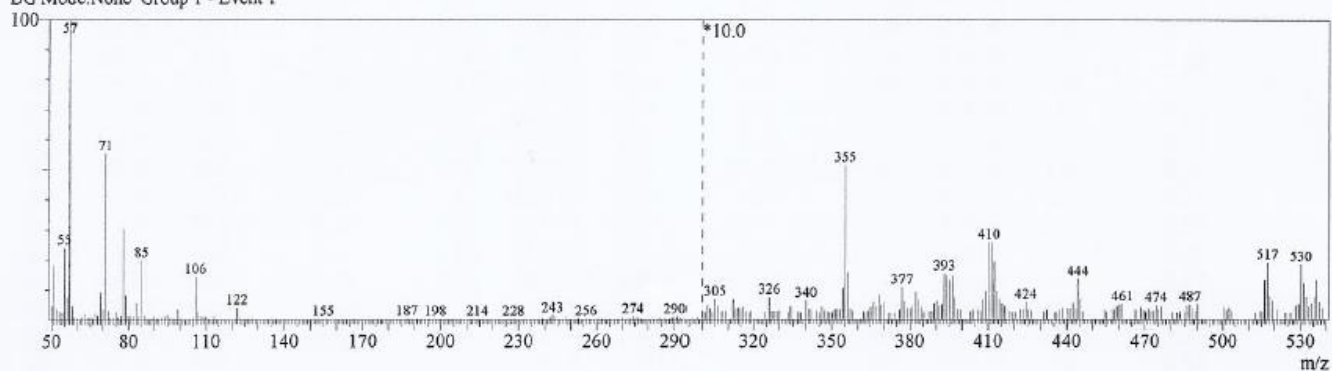

Figure S20. MS (ESI) of Compound 6

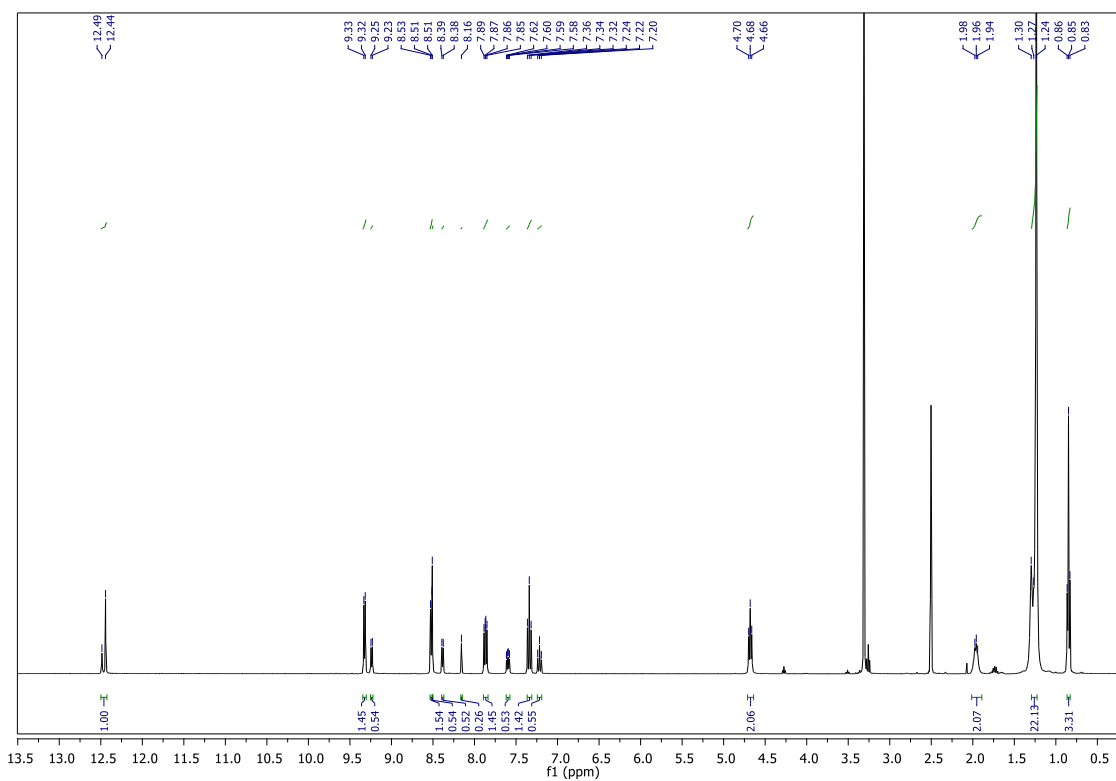

Figure S21. <sup>1</sup>H NMR of Compound 7

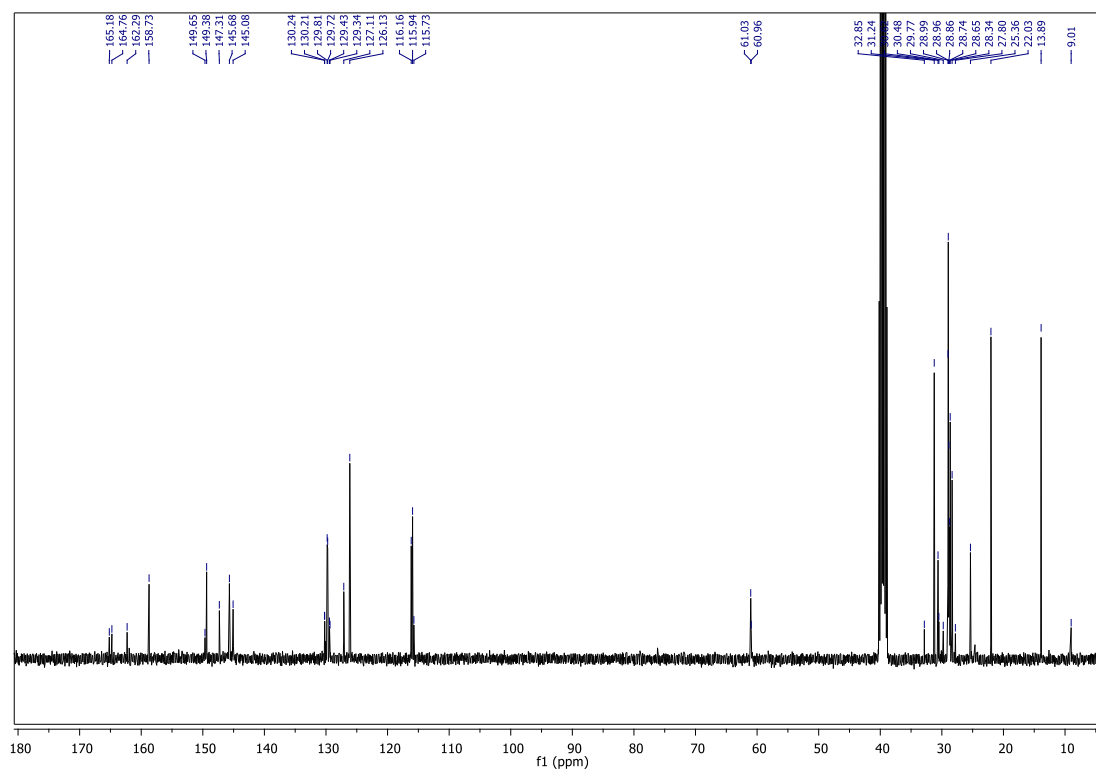

Figure S22. <sup>13</sup>C NMR of Compound 7

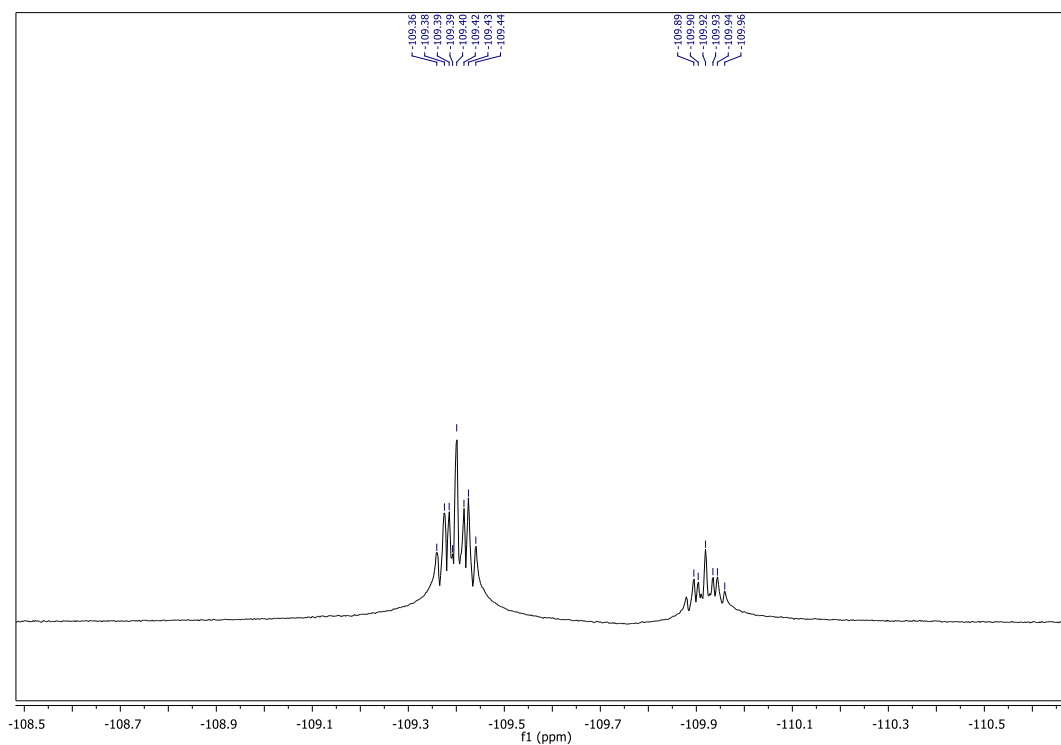

Figure S23.  $^{19}\text{F}$ NMR of Compound 7

Line#:1 R.Time:5.4(Scan#:650)

MassPeaks:319

RawMode:Single 5.4(650) BasePeak:57(39404)

BG Mode:None Group 1 - Event 1

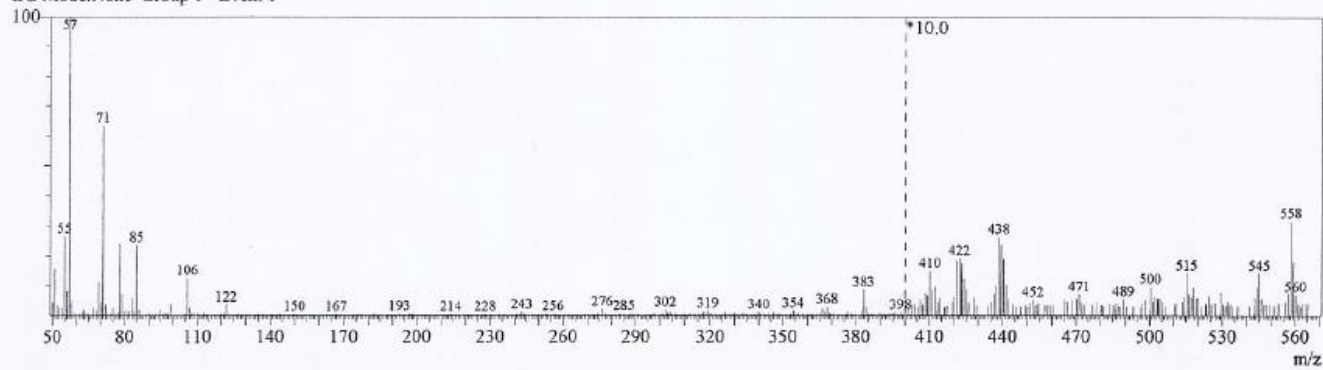

Mass Table

Figure S24. MS (ESI) of Compound 7

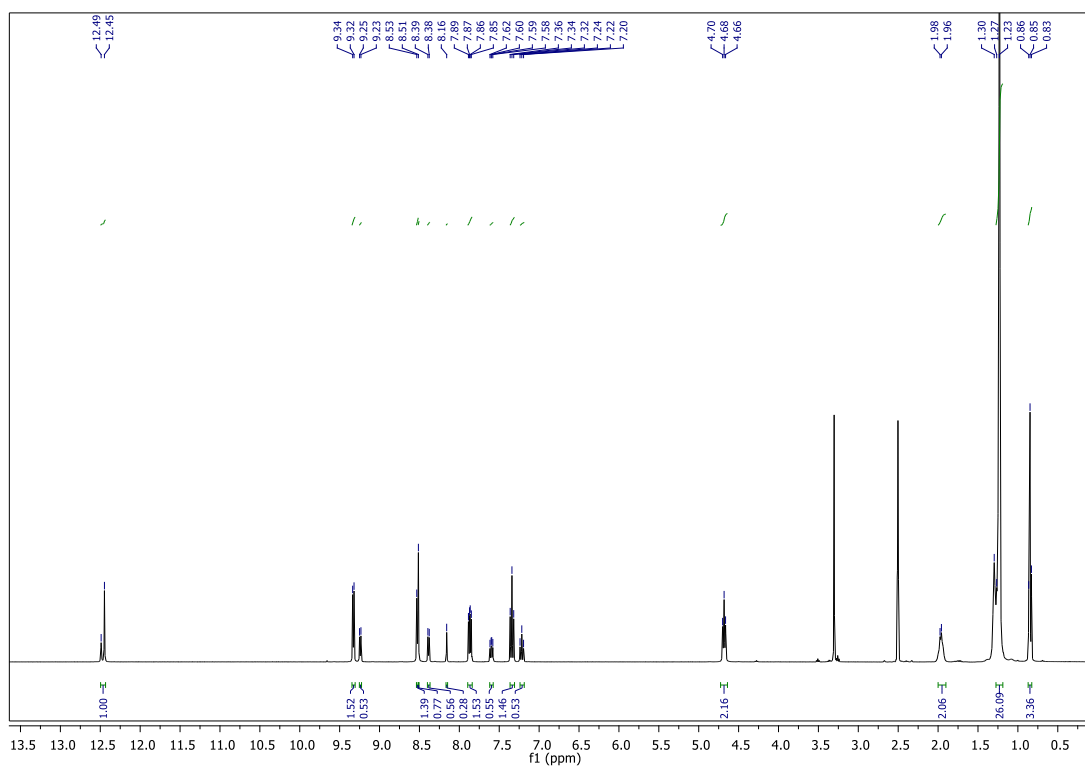

Figure S25. <sup>1</sup>H NMR of Compound 8

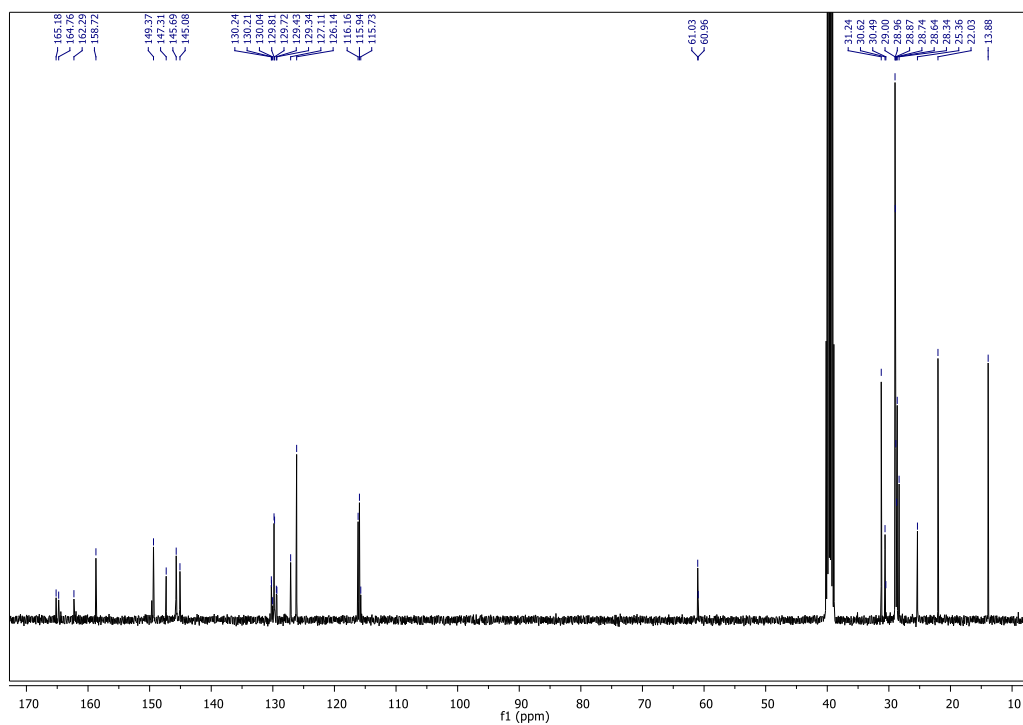

Figure S26. <sup>13</sup>C NMR of Compound 8

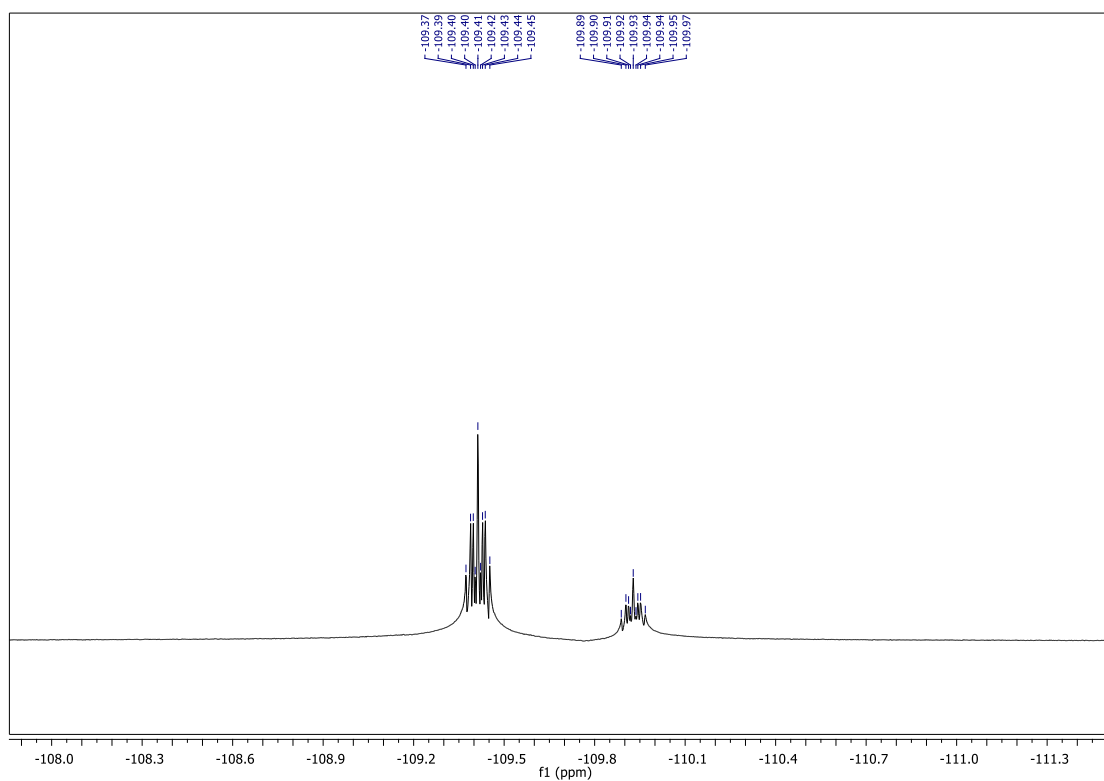

Figure S27. <sup>19</sup>F NMR of Compound 8

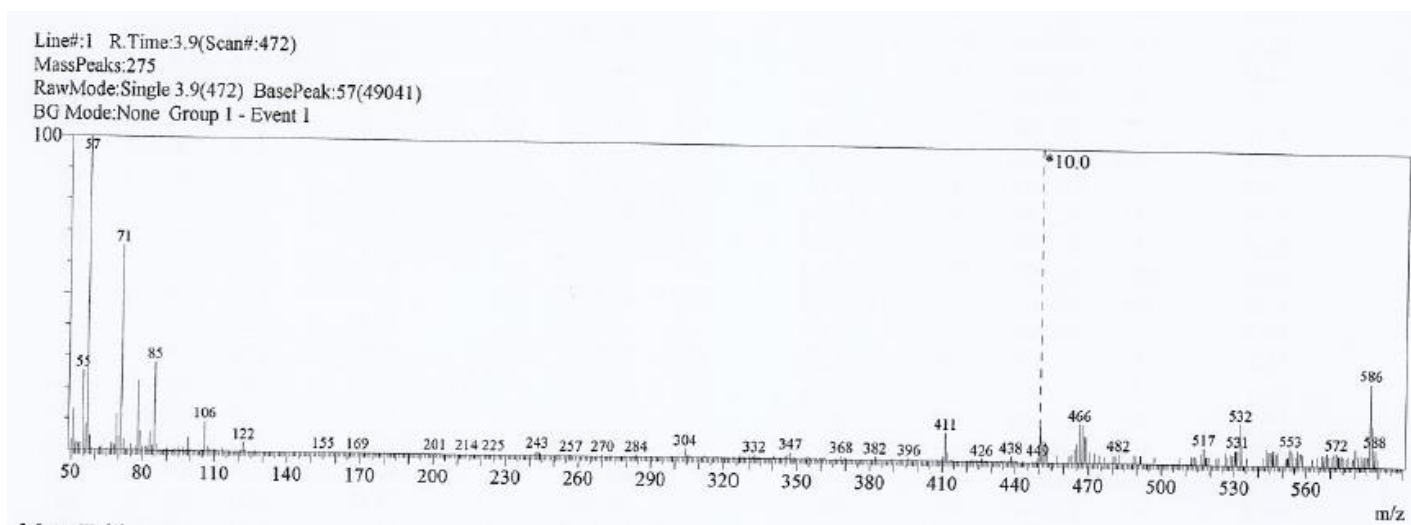

Figure S28. MS (ESI) of Compound 8

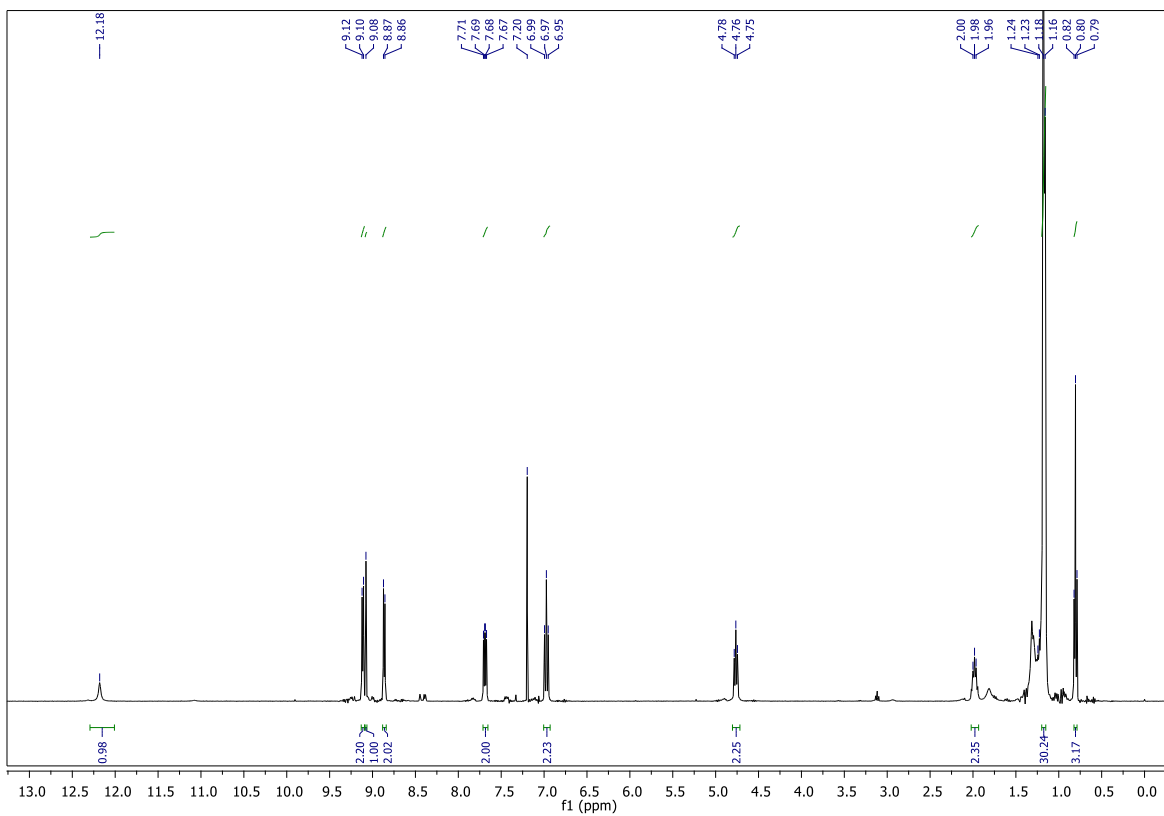

Figure S29. <sup>1</sup>H NMR of Compound 9

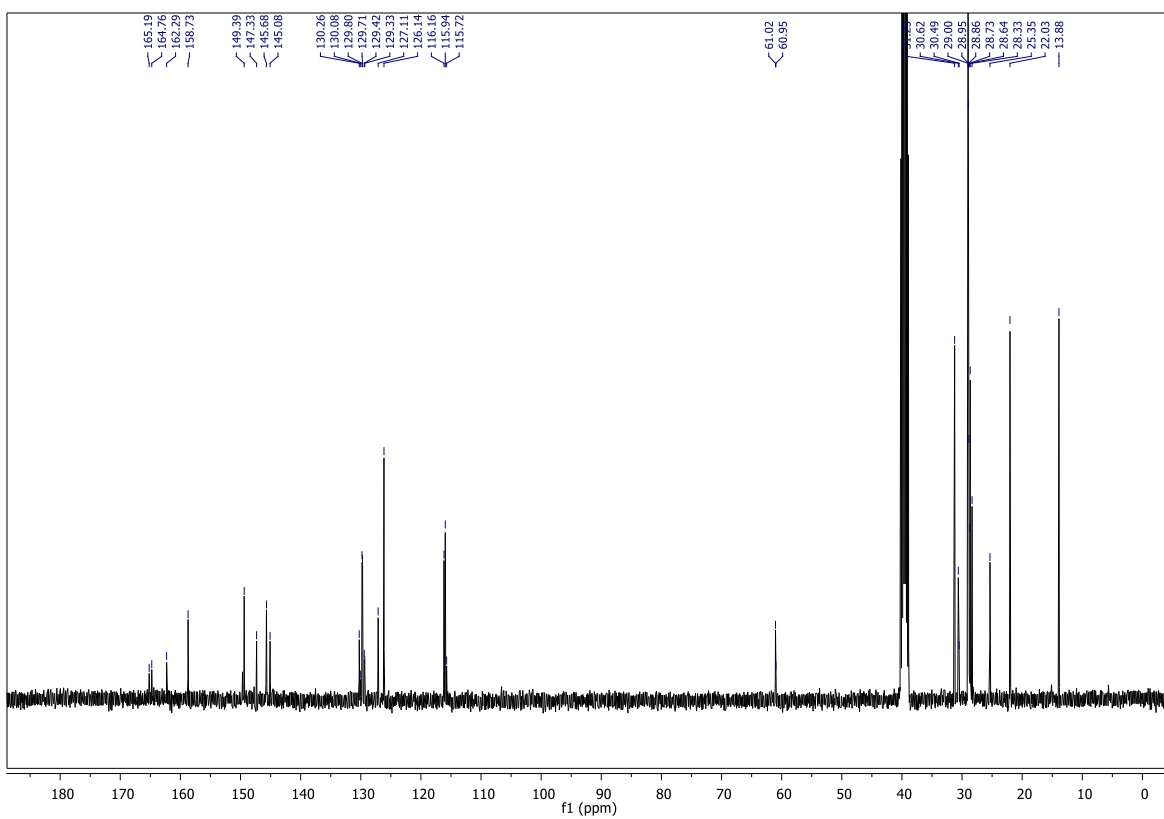

Figure S30. <sup>13</sup>C NMR of Compound 9

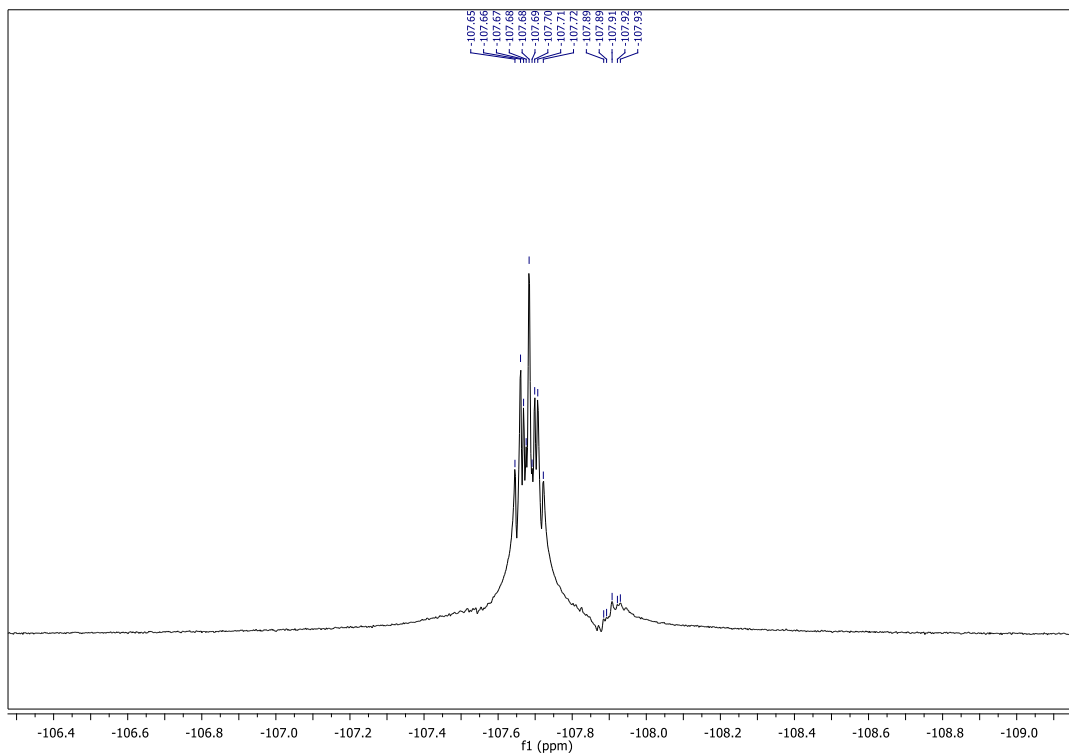

Figure S31.  $^{19}\text{F}$ NMR of Compound 9

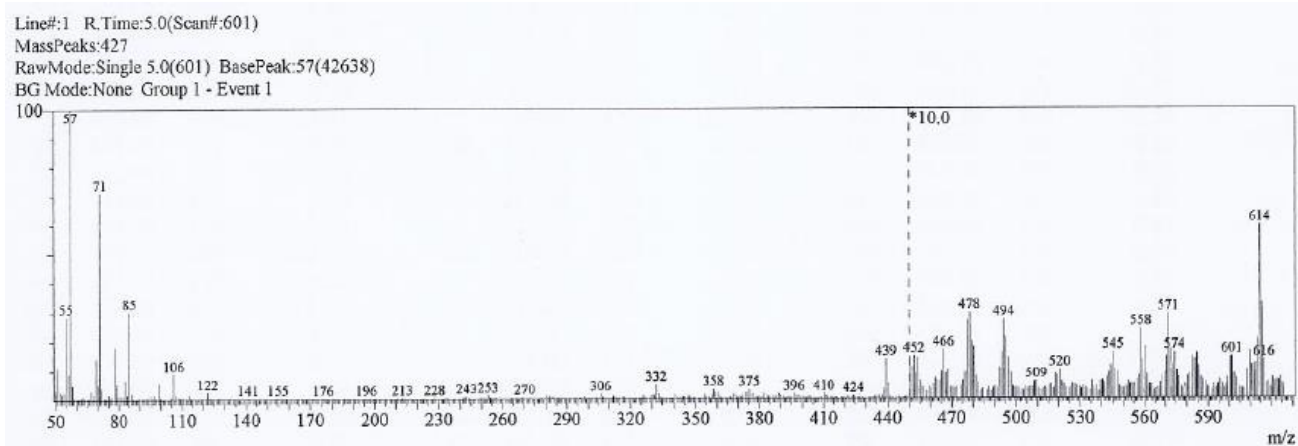

Figure S32. MS (ESI) of Compound 9



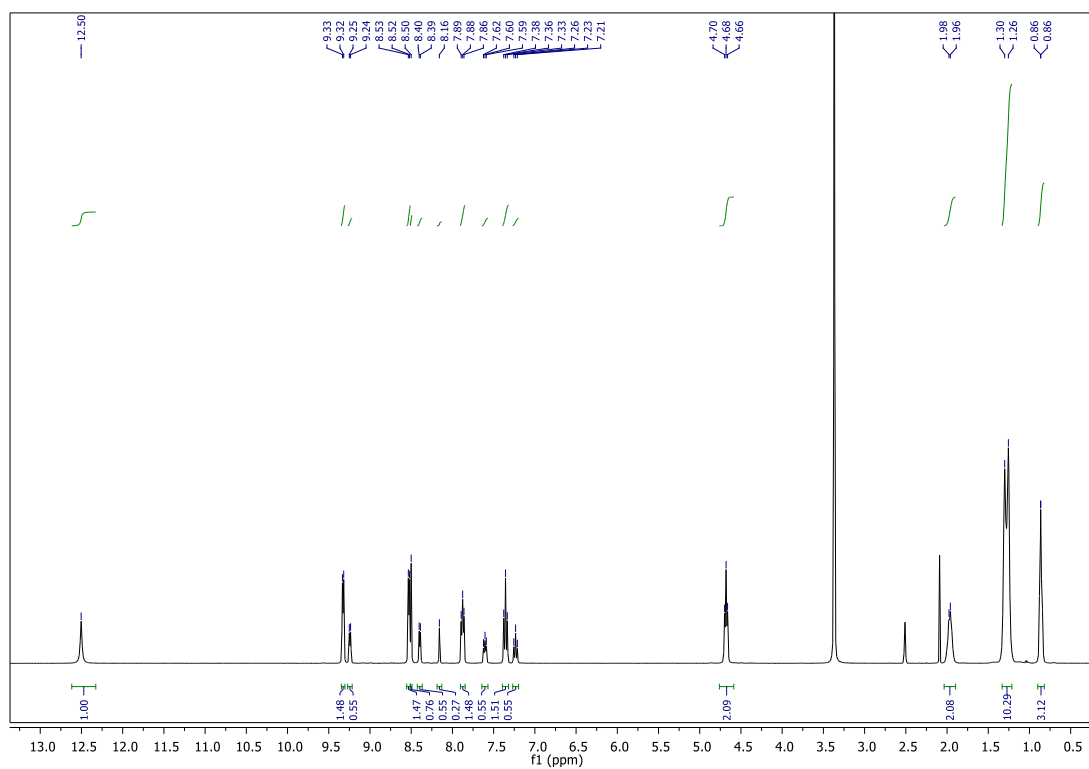

Figure S33.  $^1\text{H}$ NMR of Compound 10

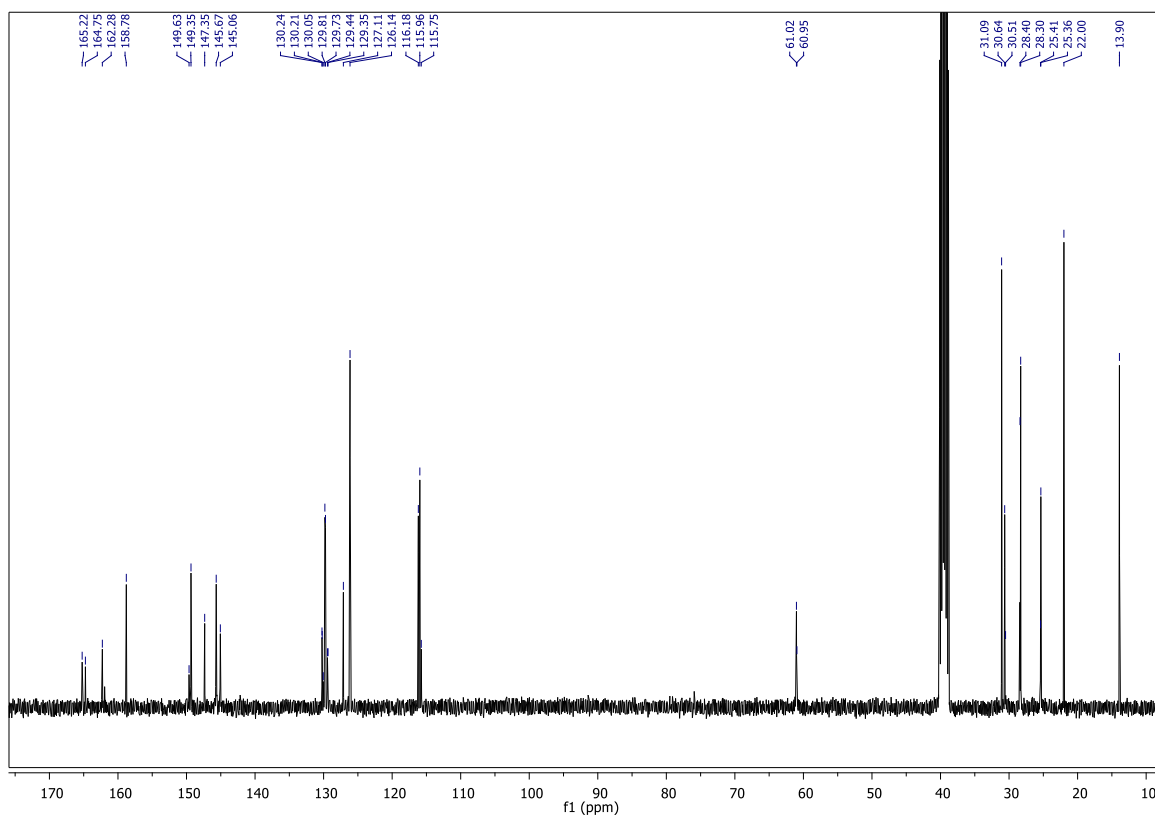

Figure S34.  $^{13}\text{C}$ NMR of Compound 10

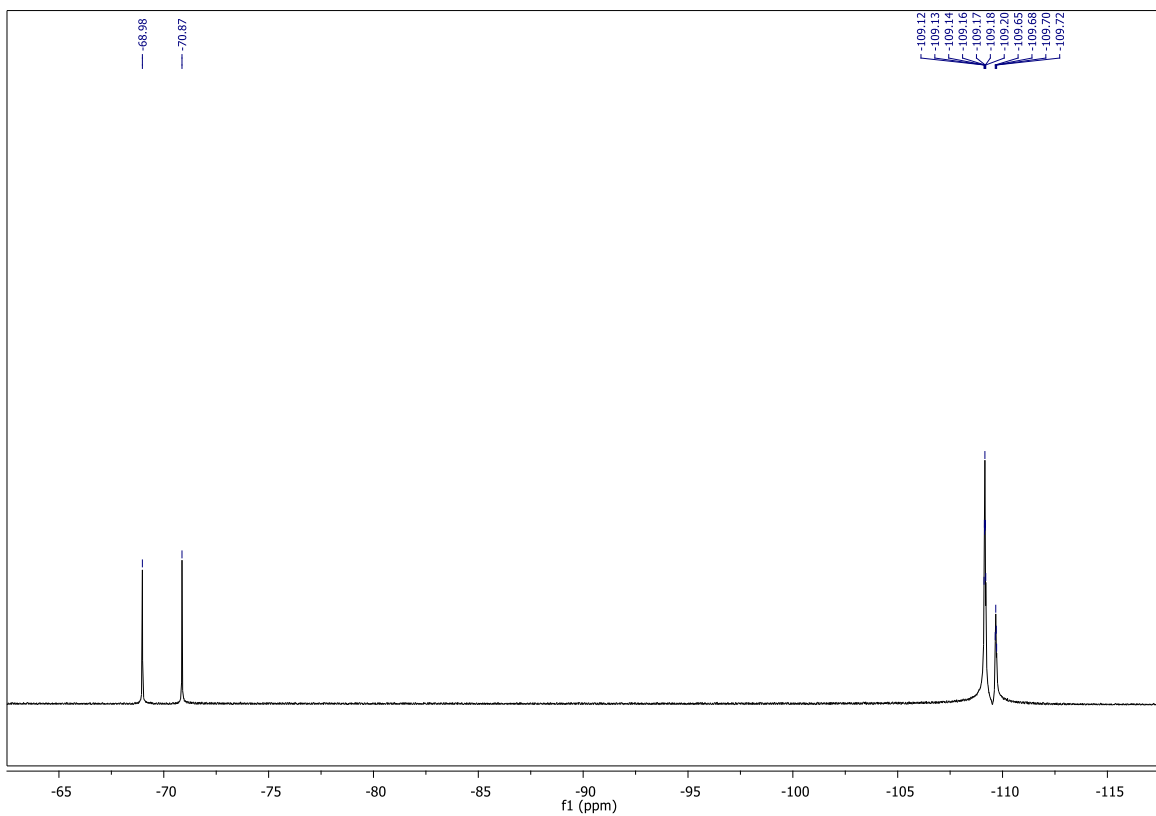

Figure S35.  $^{19}\text{F}$ NMR of Compound 10

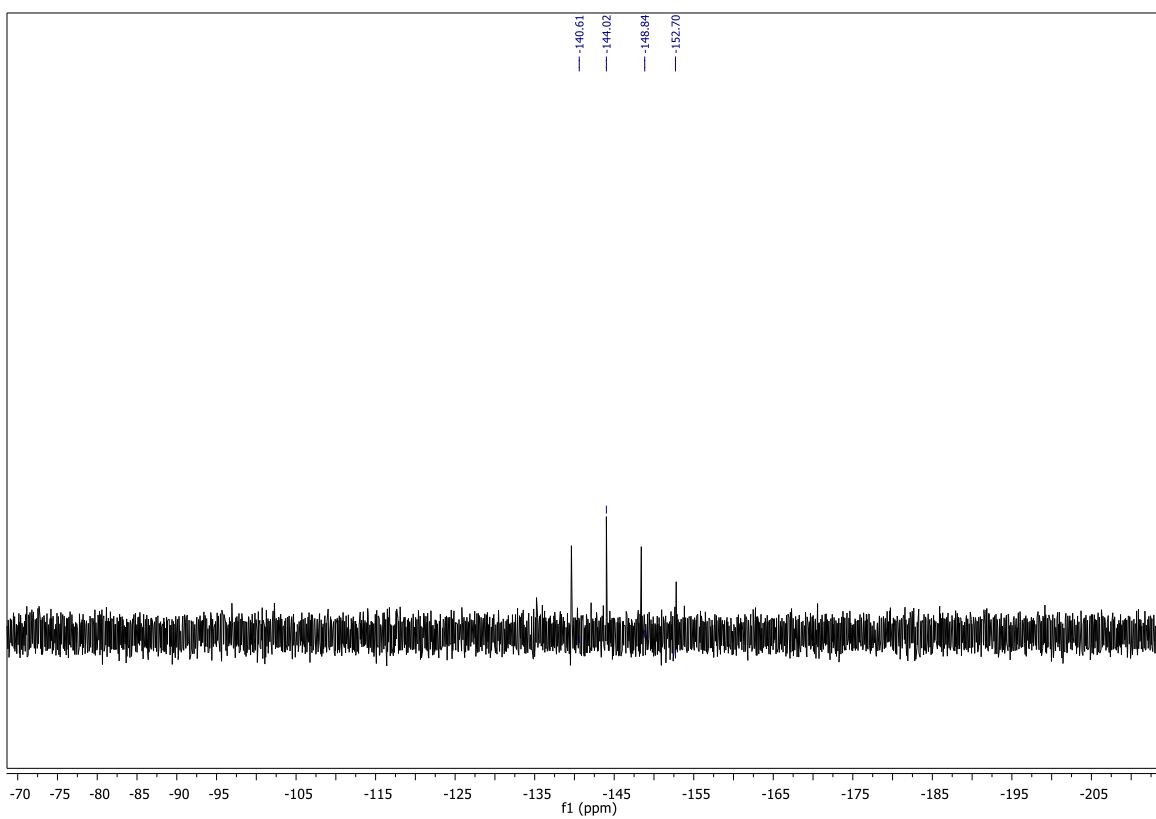

Figure S36.  $^{31}\text{P}$ NMR of Compound 10

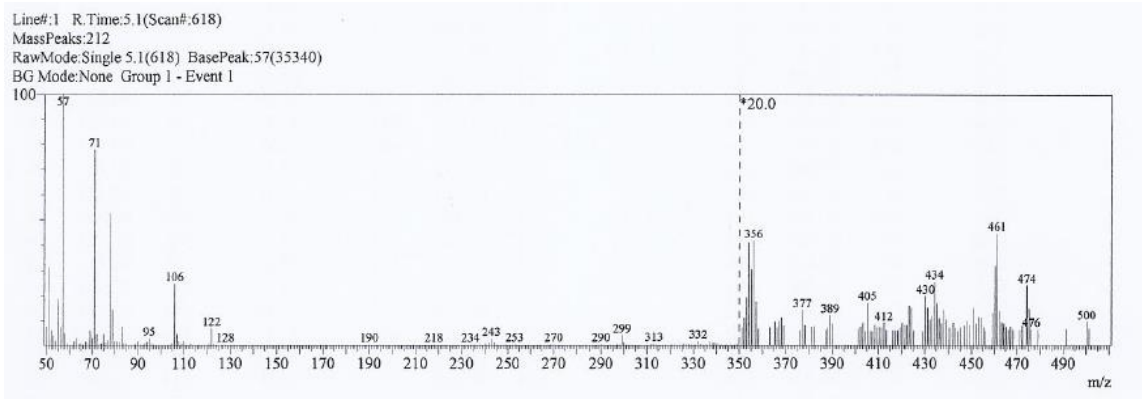

Figure S37. MS (ESI) of Compound 10

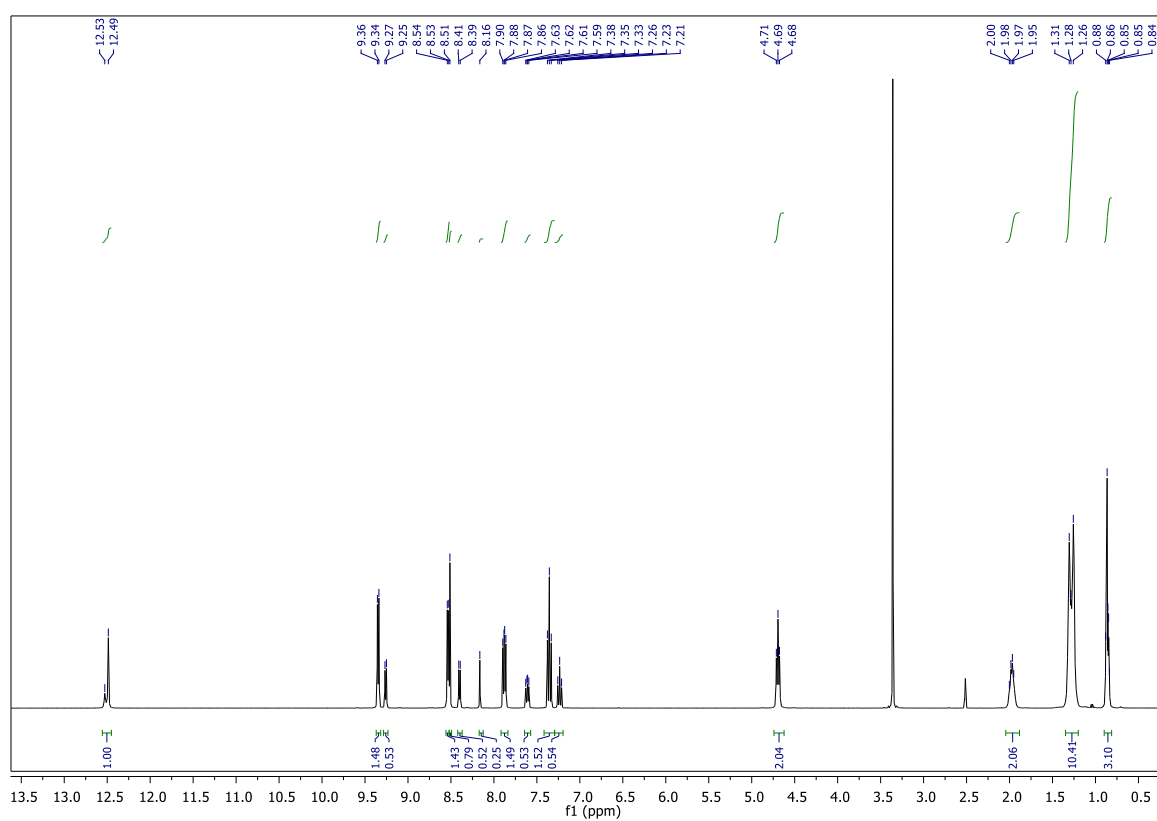

Figure S38. <sup>1</sup>H NMR of Compound 11

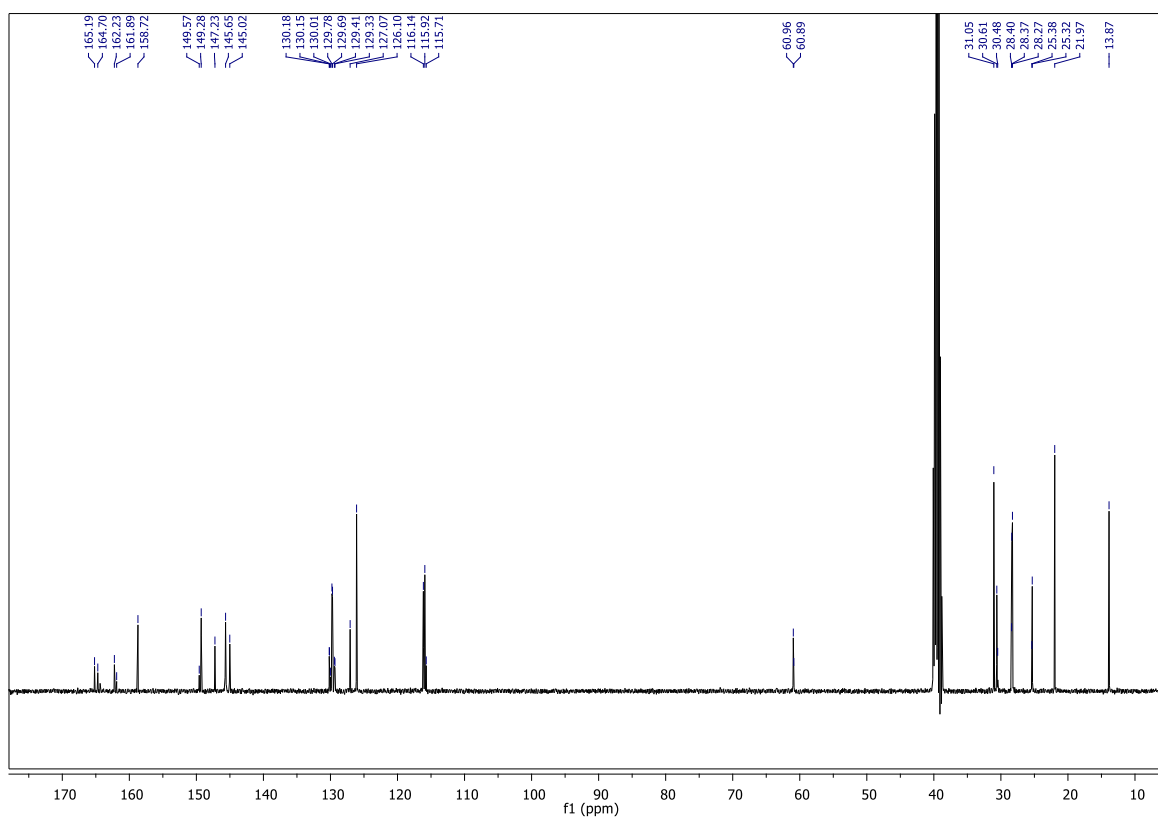

Figure S39. <sup>13</sup>C NMR of Compound 11

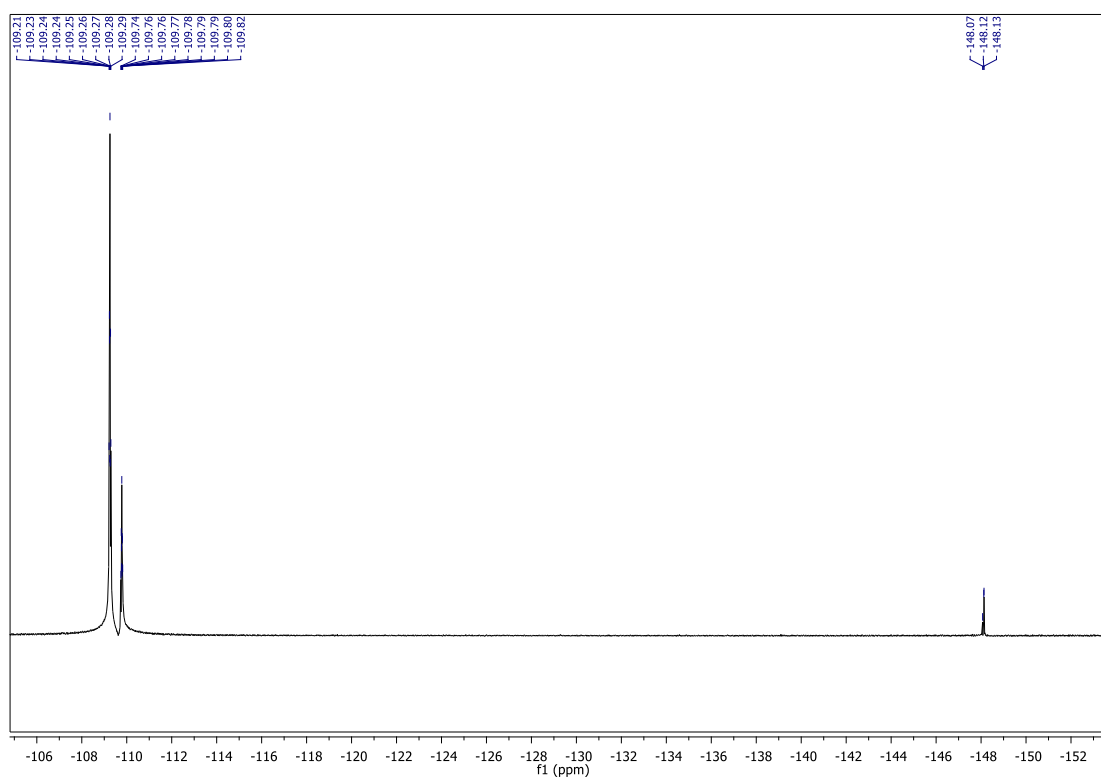

Figure S40. <sup>19</sup>F NMR of Compound 11

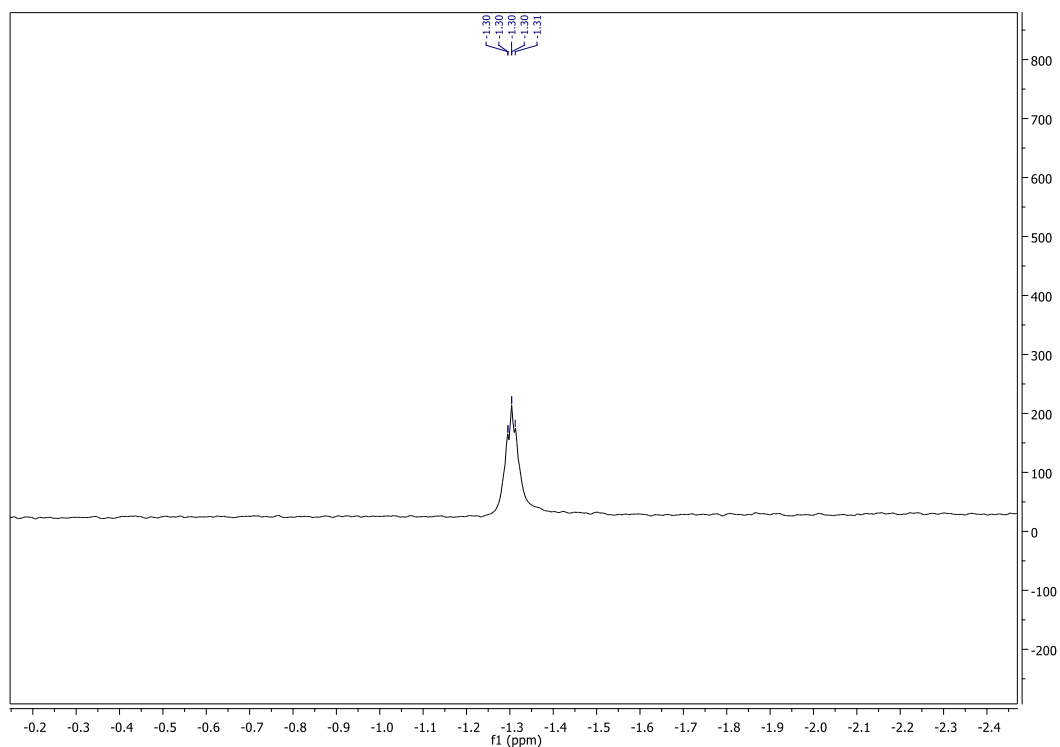

Figure S41.  $^{11}\text{B}$ NMR of Compound 11

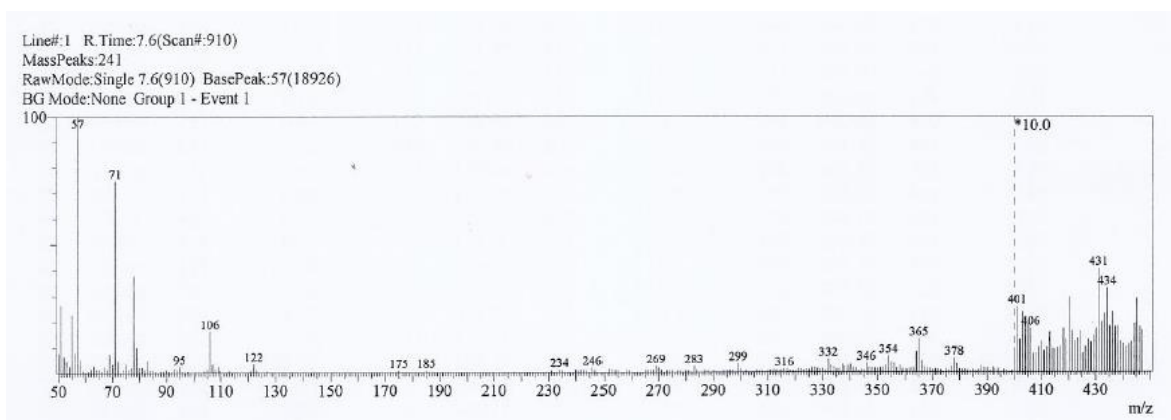

Figure S42. MS (ESI) of Compound 11

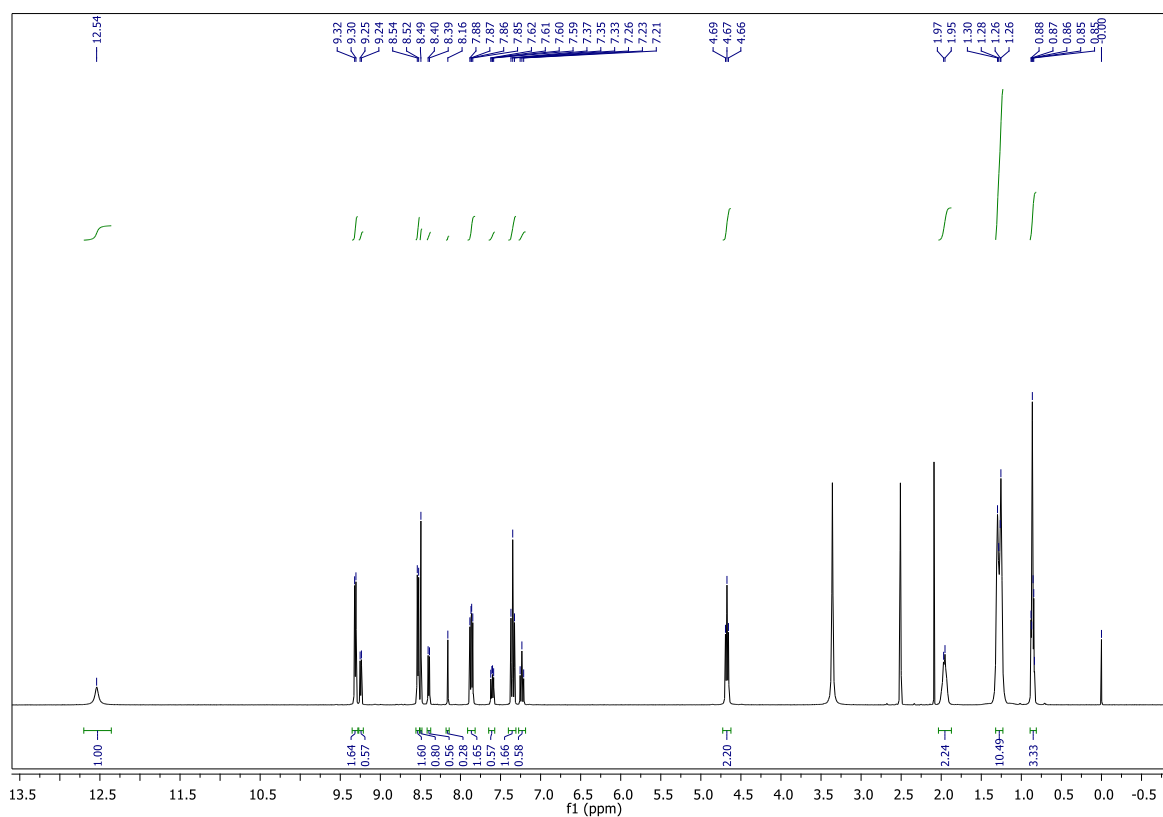

Figure S43. <sup>1</sup>H NMR of Compound 12

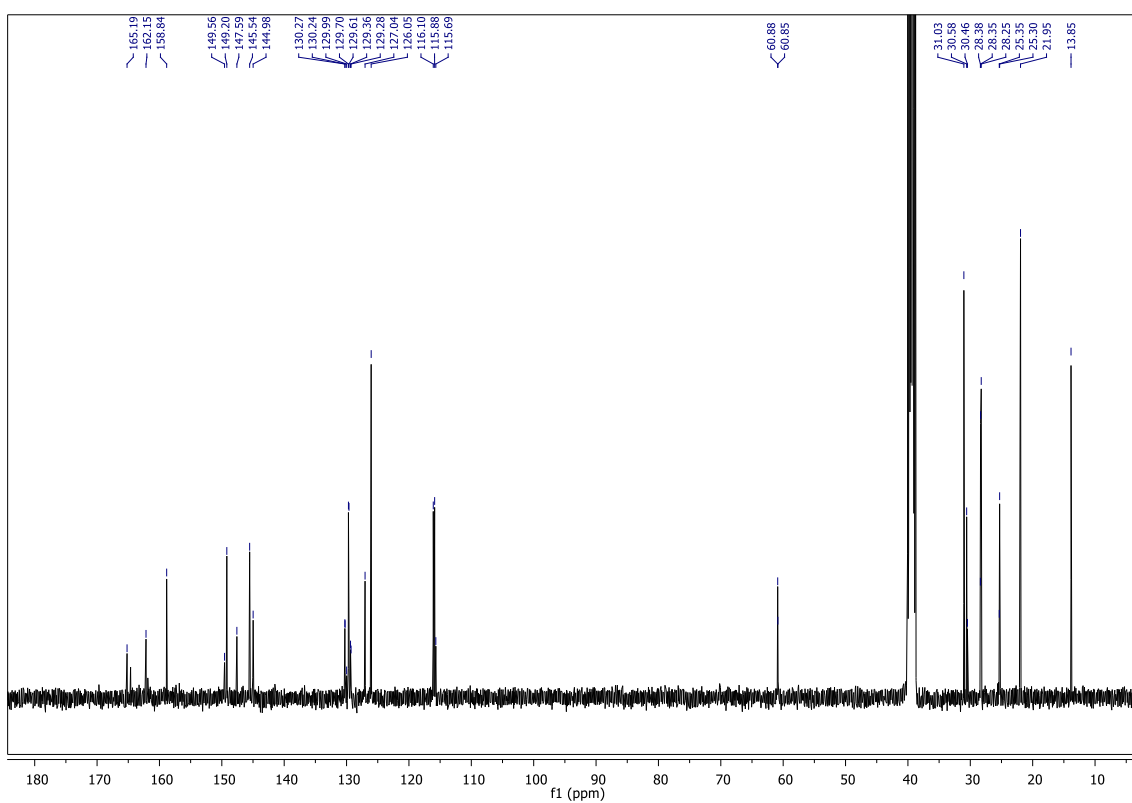

Figure S44. <sup>13</sup>C NMR of Compound 12

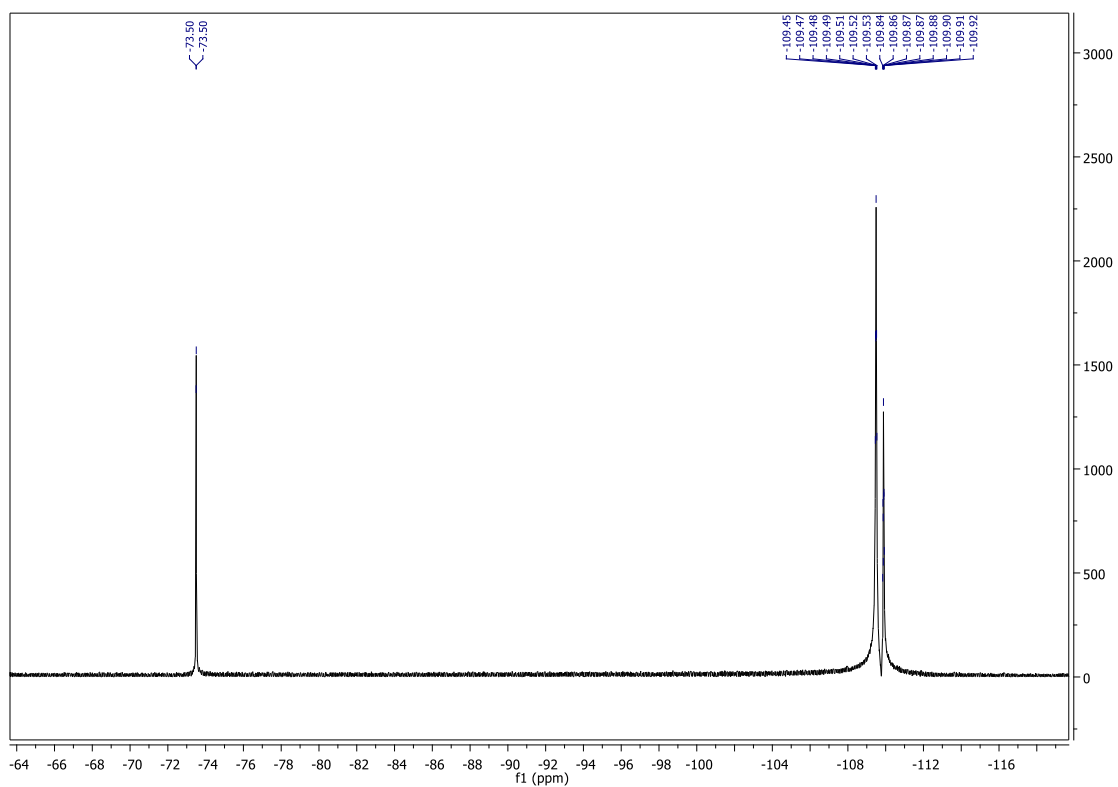

Figure S45.  $^{19}\text{F}$ NMR of Compound 12

Line#:1 R.Time:3.8(Scan#:453)

MassPeaks:209

RawMode:Single 3.8(453) BasePeak:57(31484)

BG Mode:None Group 1 - Event 1

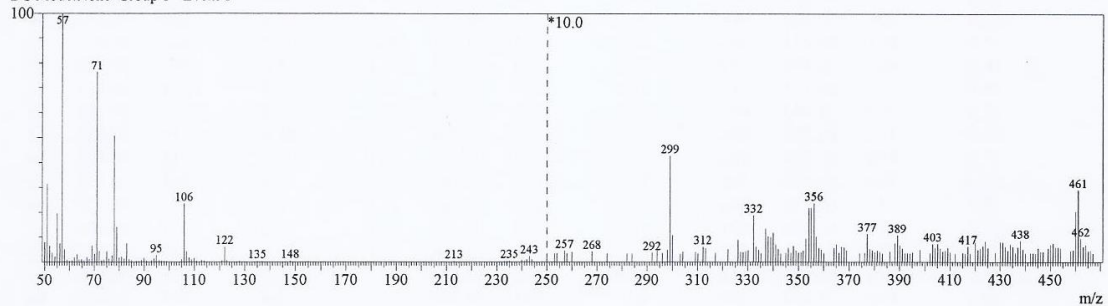

Figure S46. MS (ESI) of Compound 12

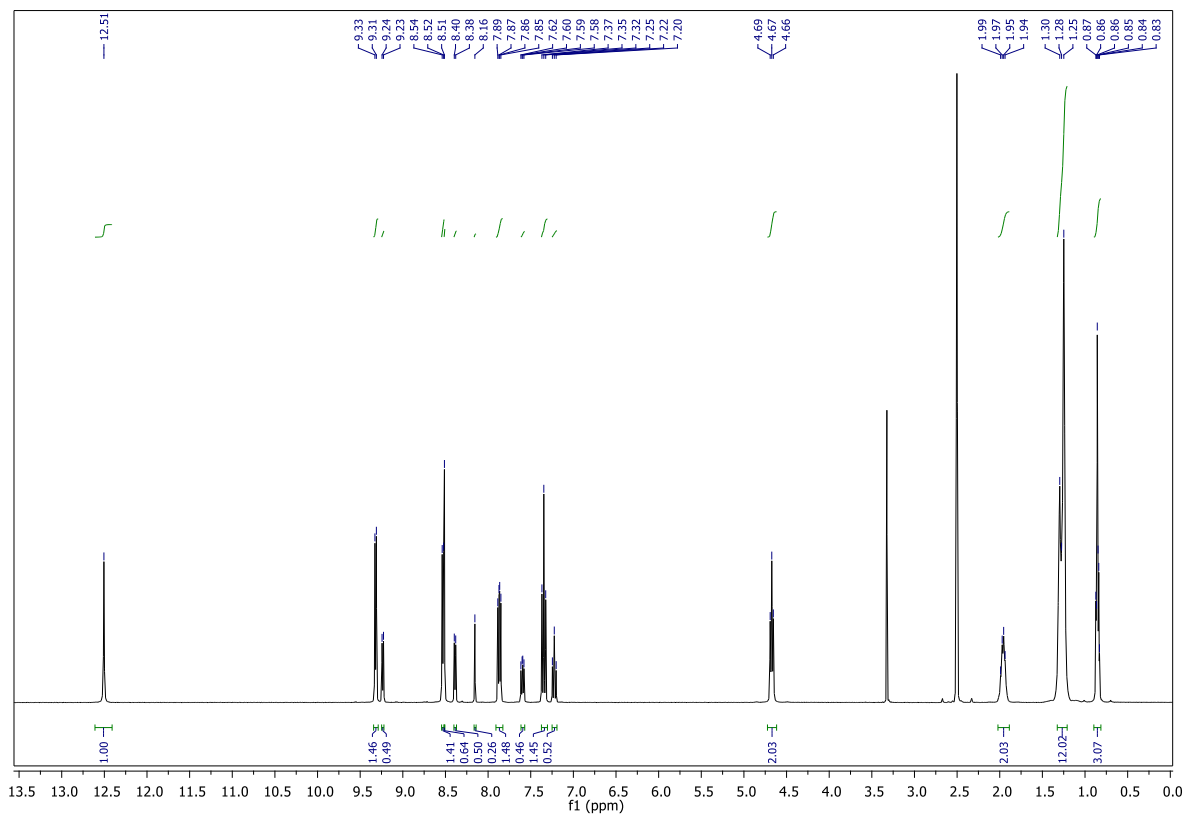

Figure S47.  $^1\text{H}$ NMR of Compound 13

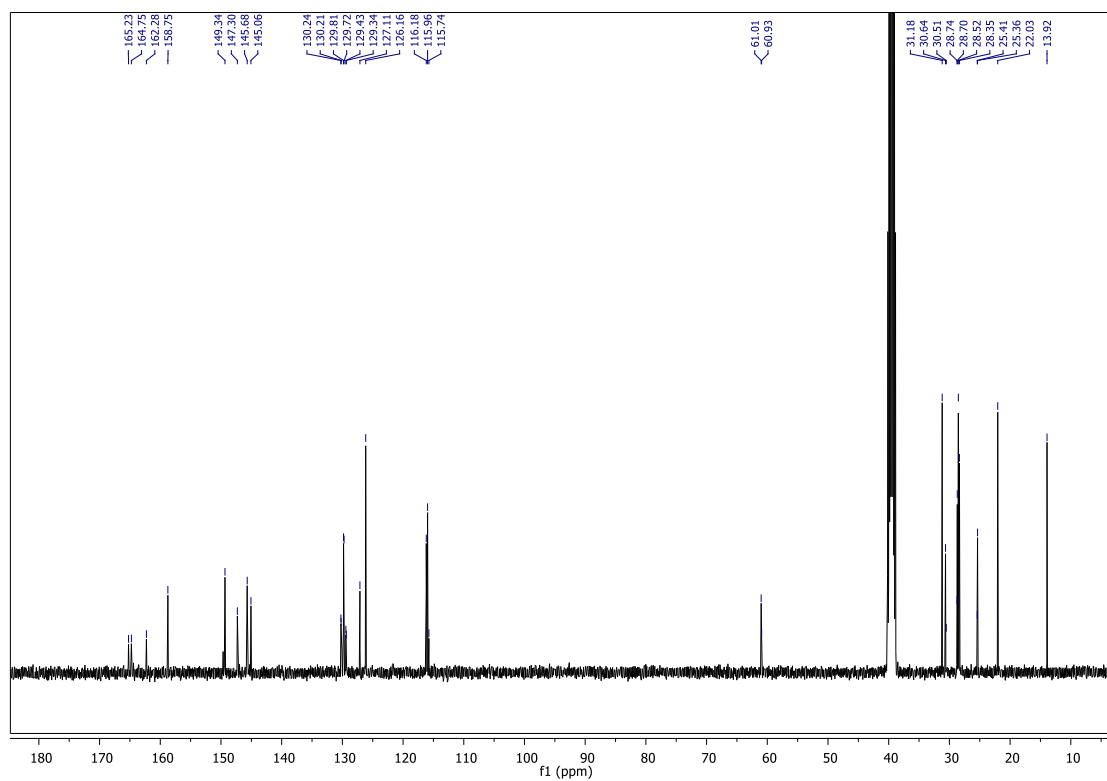

Figure S48.  $^{13}\text{C}$ NMR of Compound 13



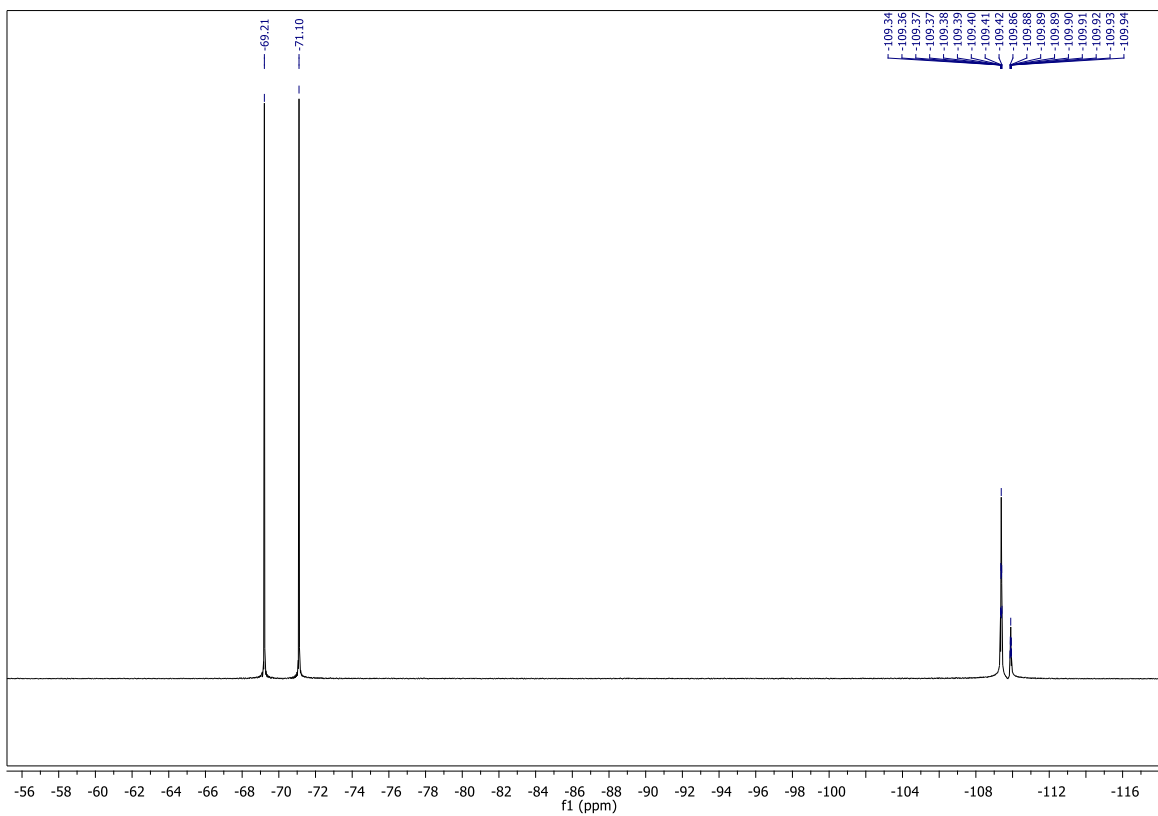

Figure S49.  $^{19}\text{F}$ NMR of Compound 13

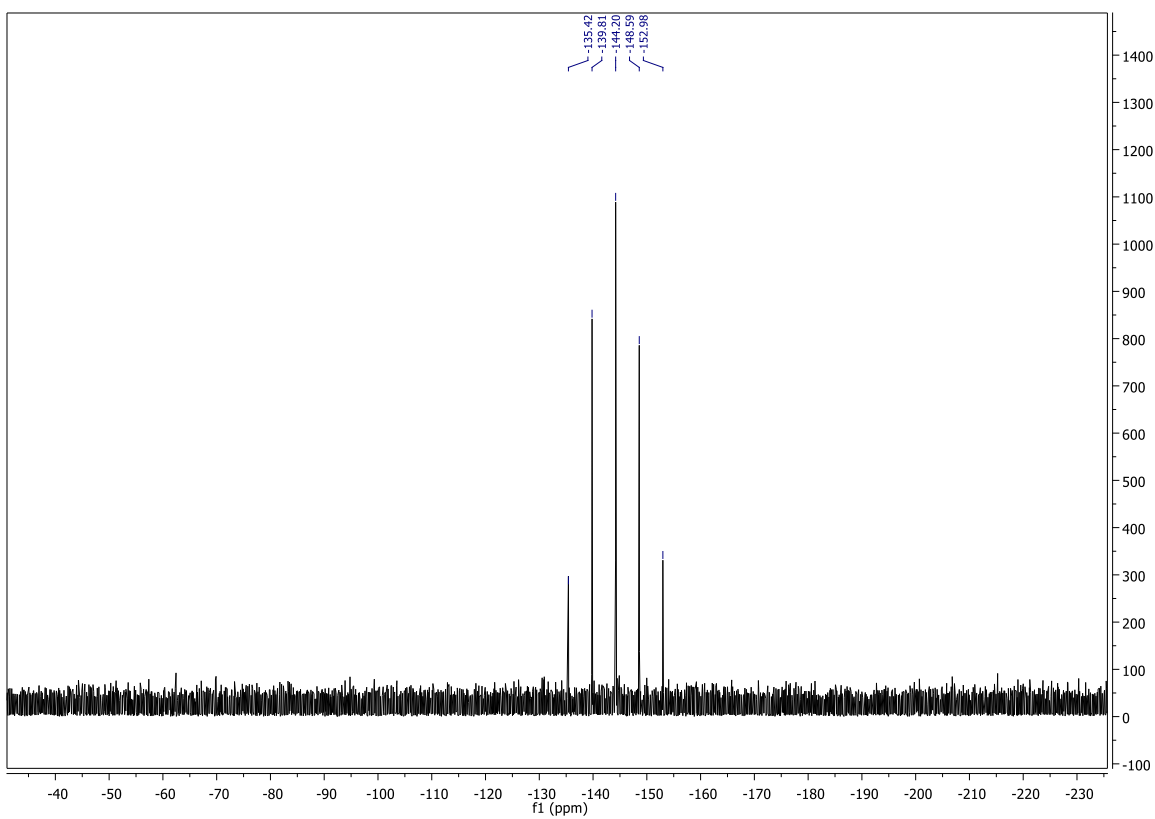

Figure S50.  $^{31}\text{P}$ NMR of Compound 13

Line#:1 R.Time:5.5(Scan#:661)  
MassPeaks:313  
RawMode:Single 5.5(661) BasePeak:57(5370)  
BG Mode:None Group 1 - Event 1

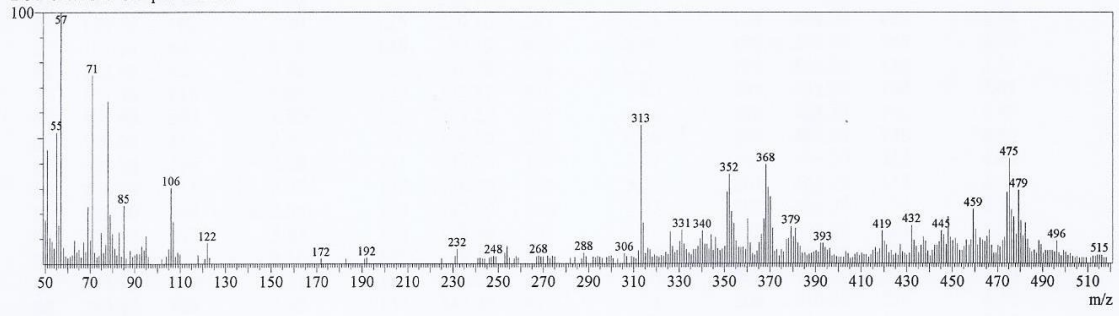

Figure S51. MS (ESI) of Compound 13

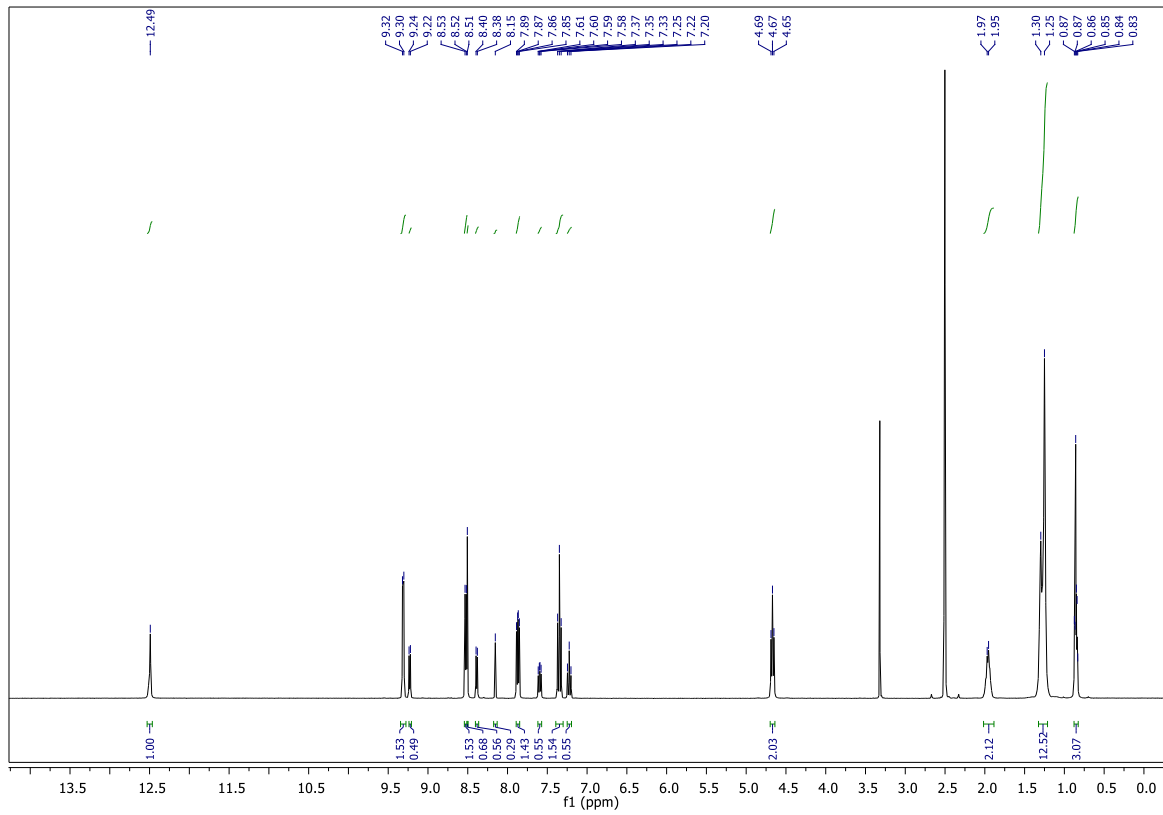

Figure S52. <sup>1</sup>H NMR of Compound 14

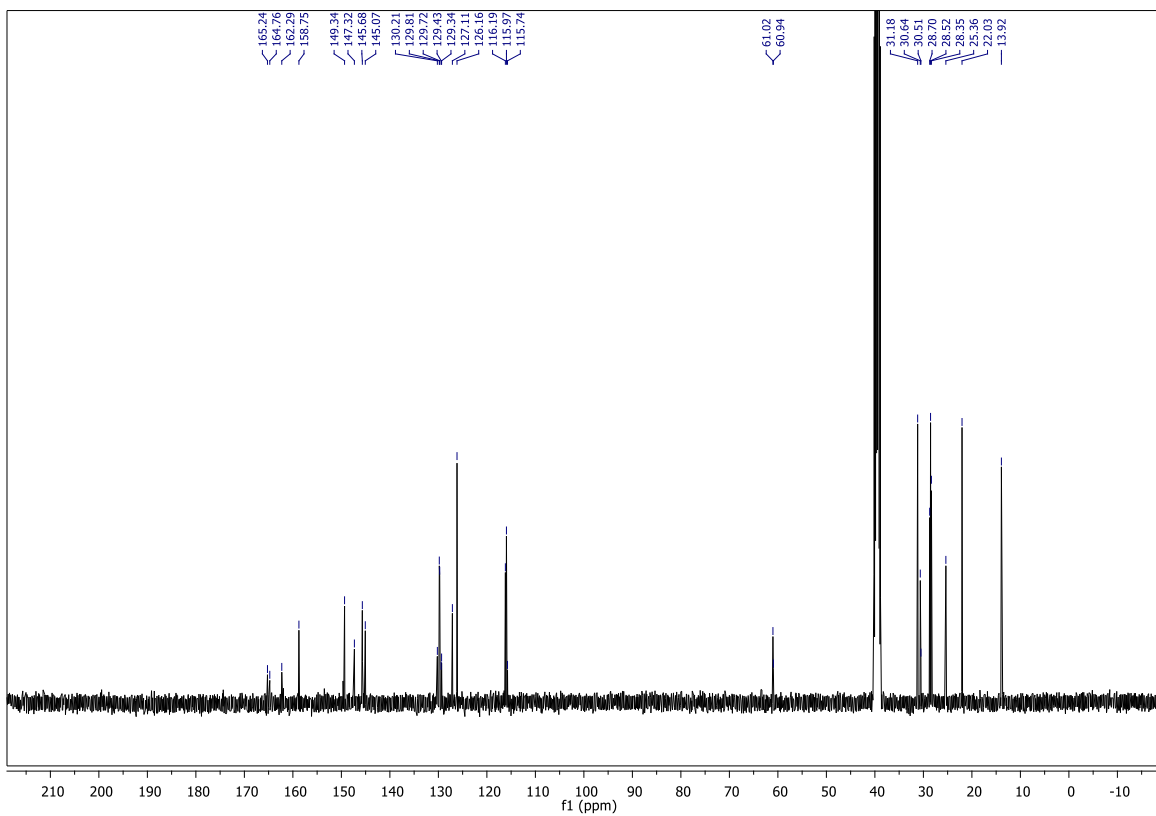

Figure S53. <sup>13</sup>CNMR of Compound 14

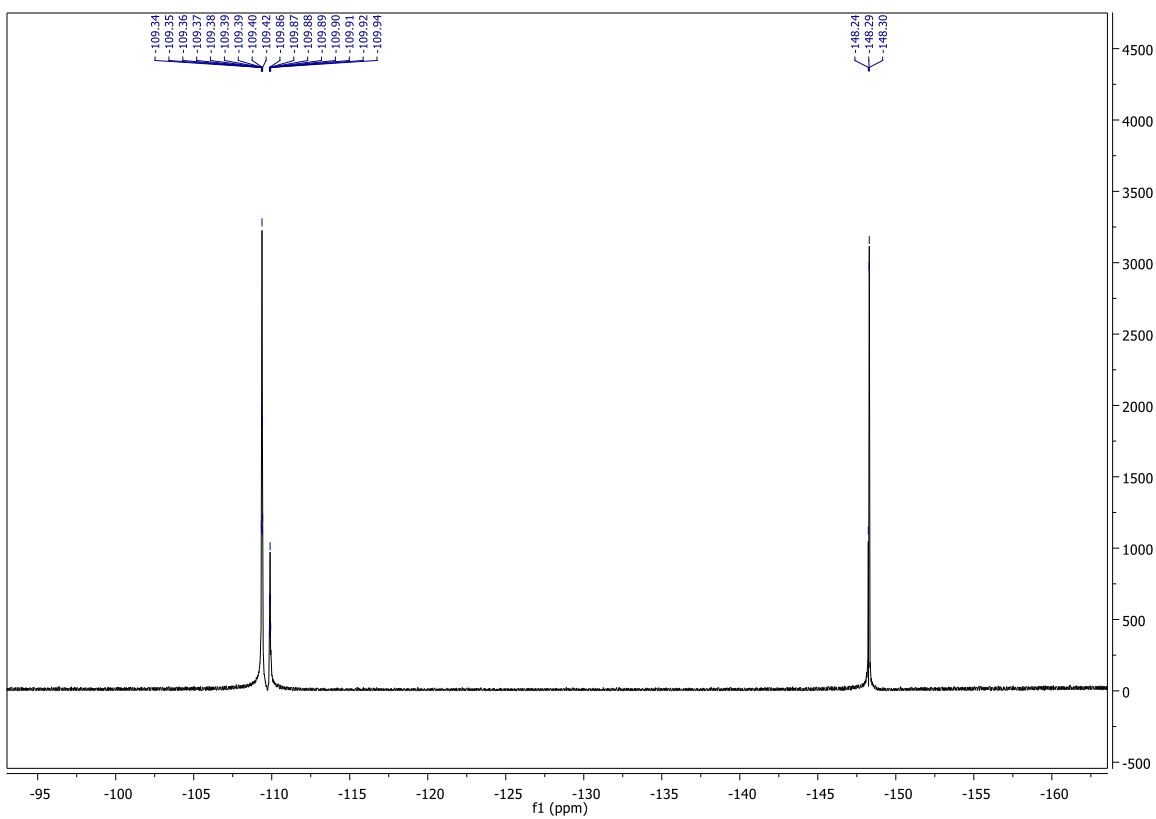

Figure S54. <sup>19</sup>FNMR of Compound 14

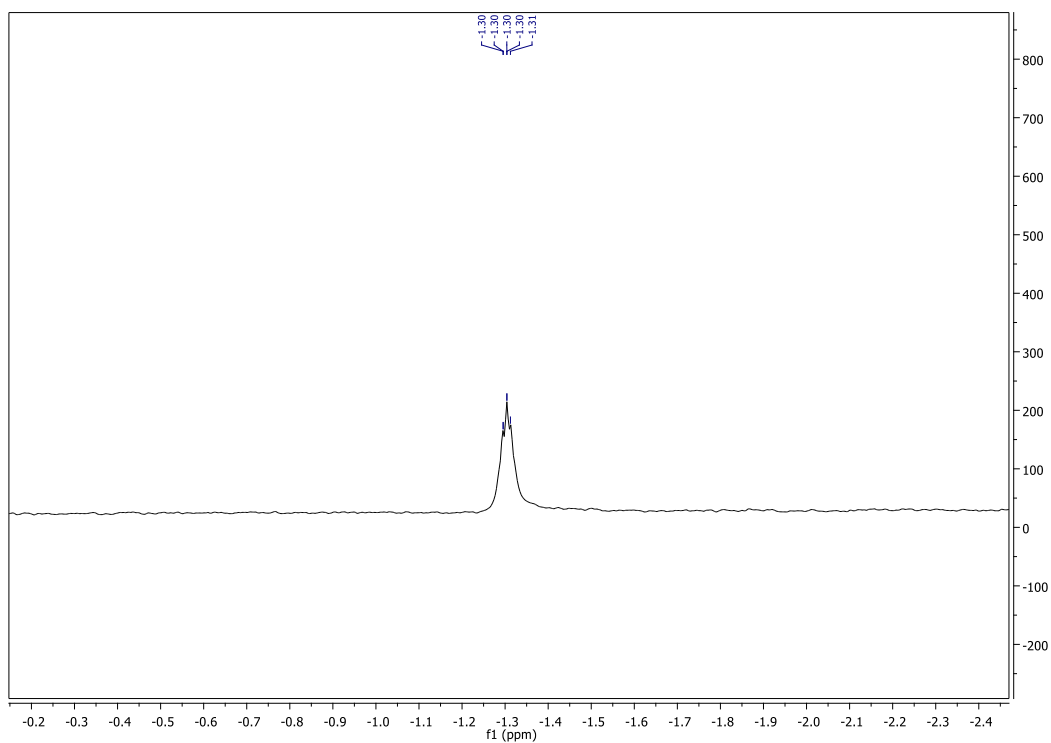

Figure S55.  $^{11}\text{B}$ NMR of Compound 14

Line#:1 R.Time:5.5(Scan#:658)

MassPeaks:303

RawMode:Single 5.5(658) BasePeak:57(16645)

BG Mode:None Group 1 - Event 1

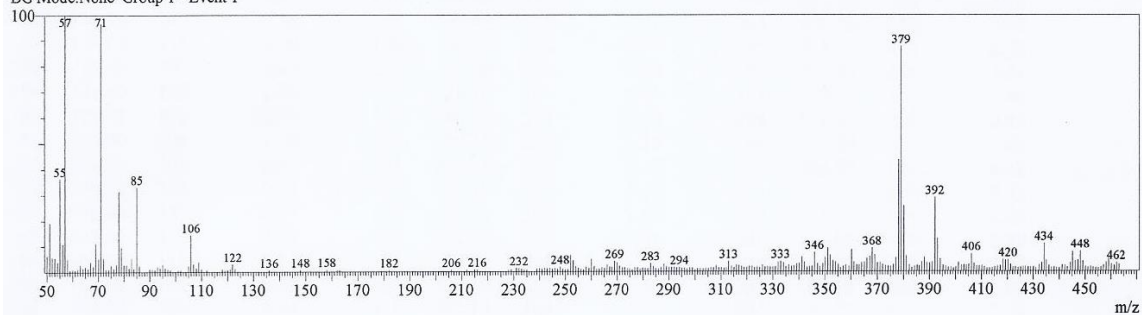

Figure S56. MS (ESI) of Compound 14

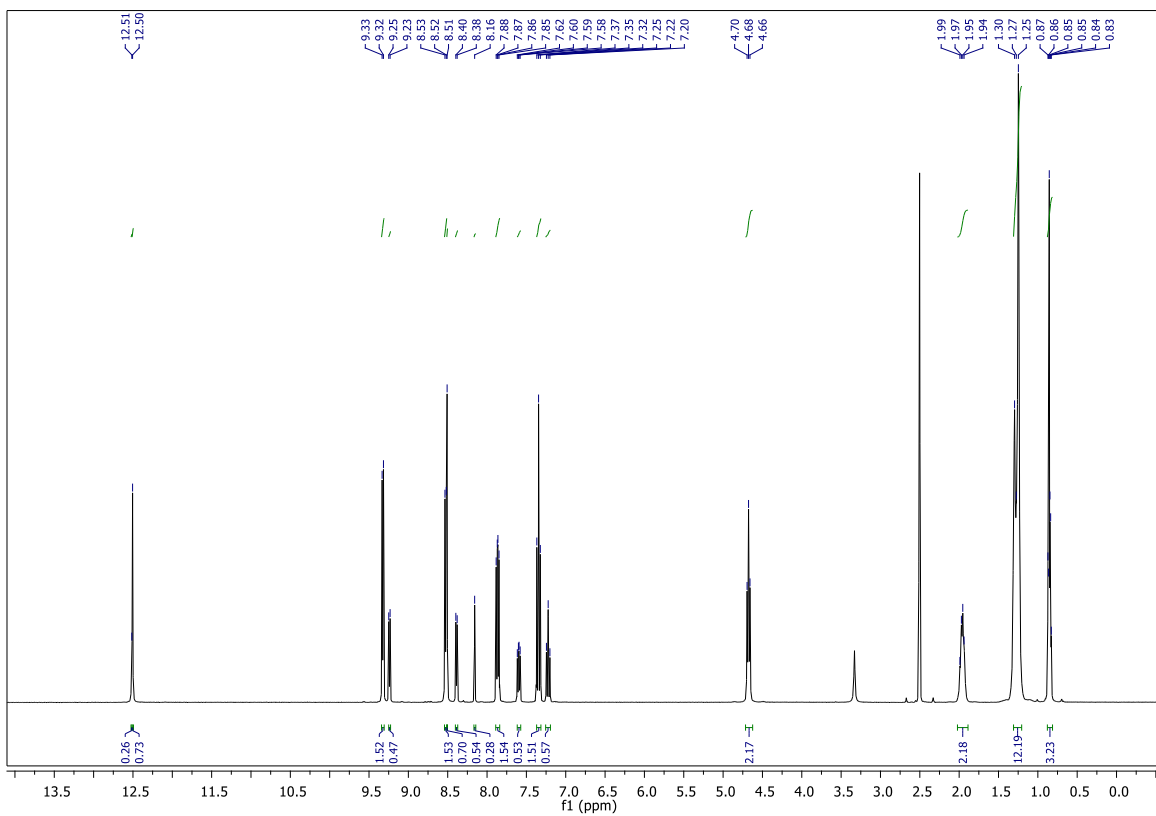

Figure S57.  $^1\text{H}$ NMR of Compound 15

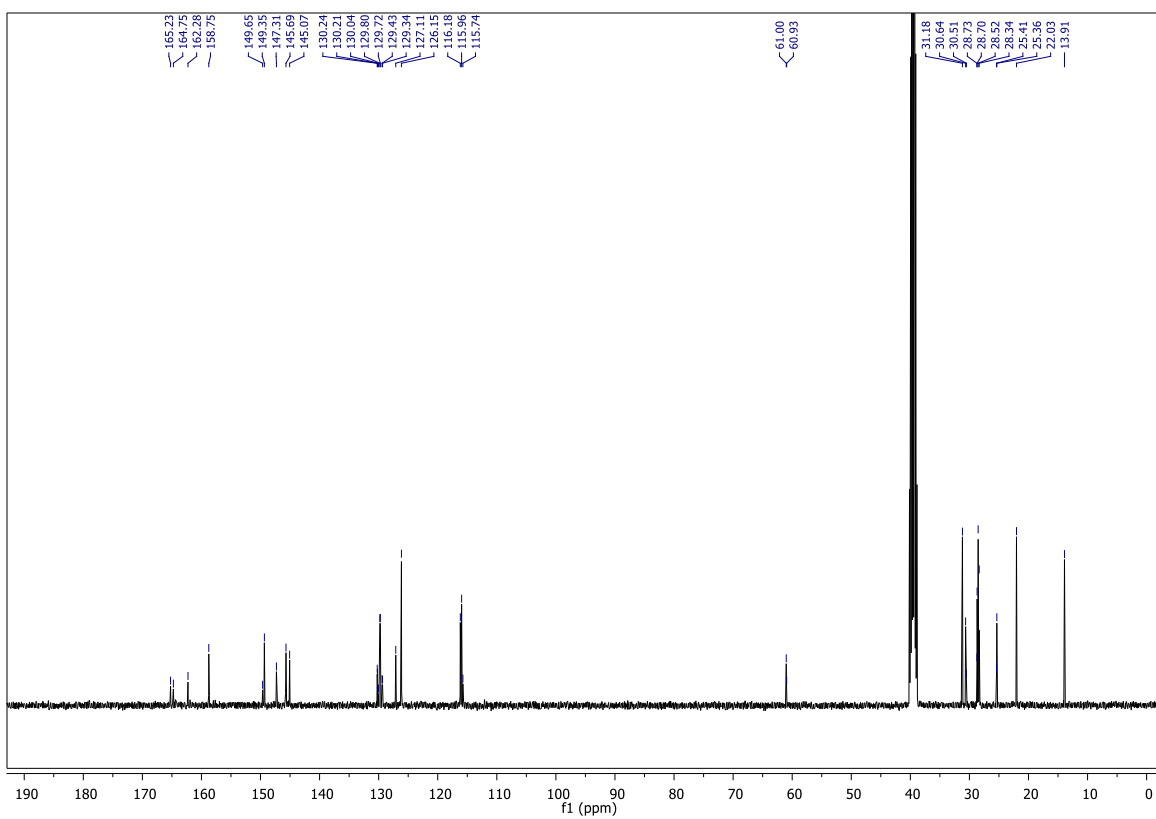

Figure S58.  $^{13}\text{C}$ NMR of Compound 15

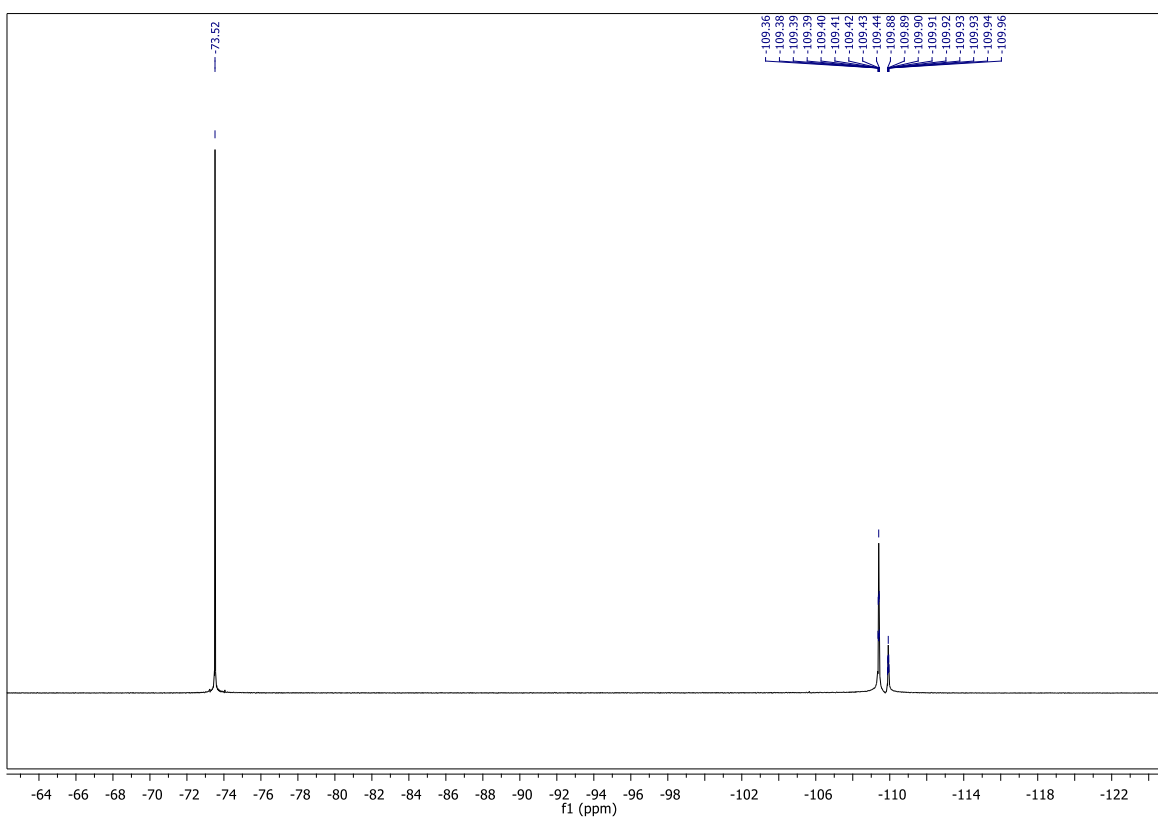

Figure S59. <sup>19</sup>F NMR of Compound 15

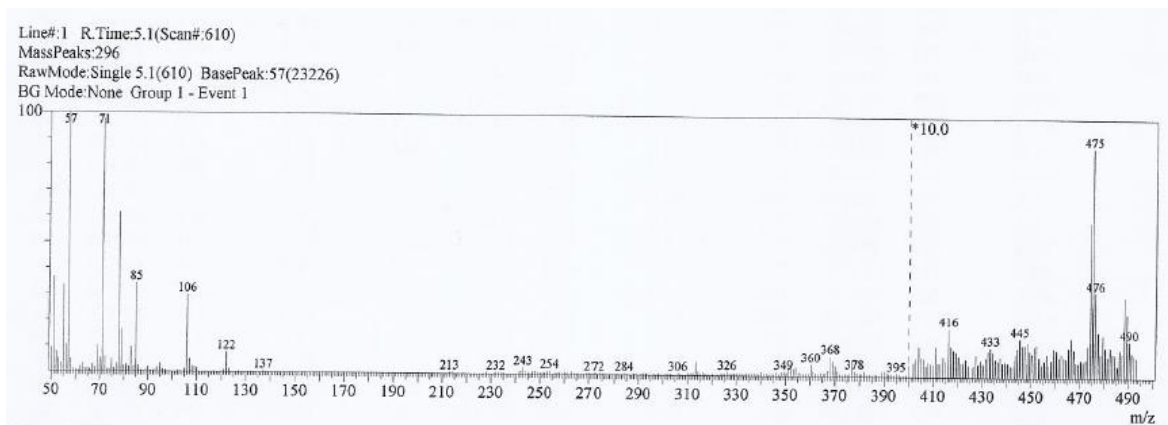

Figure S60. MS (ESI) of Compound 15

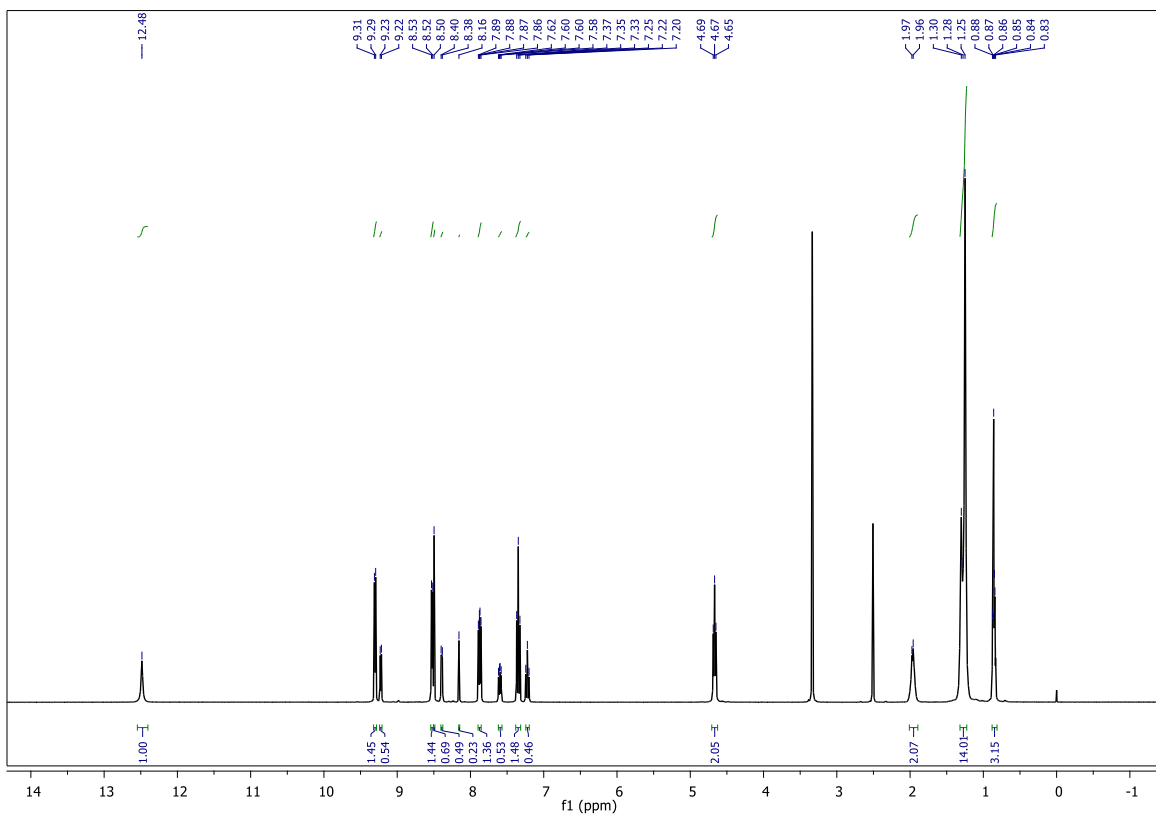

Figure S61. <sup>1</sup>H NMR of Compound 16

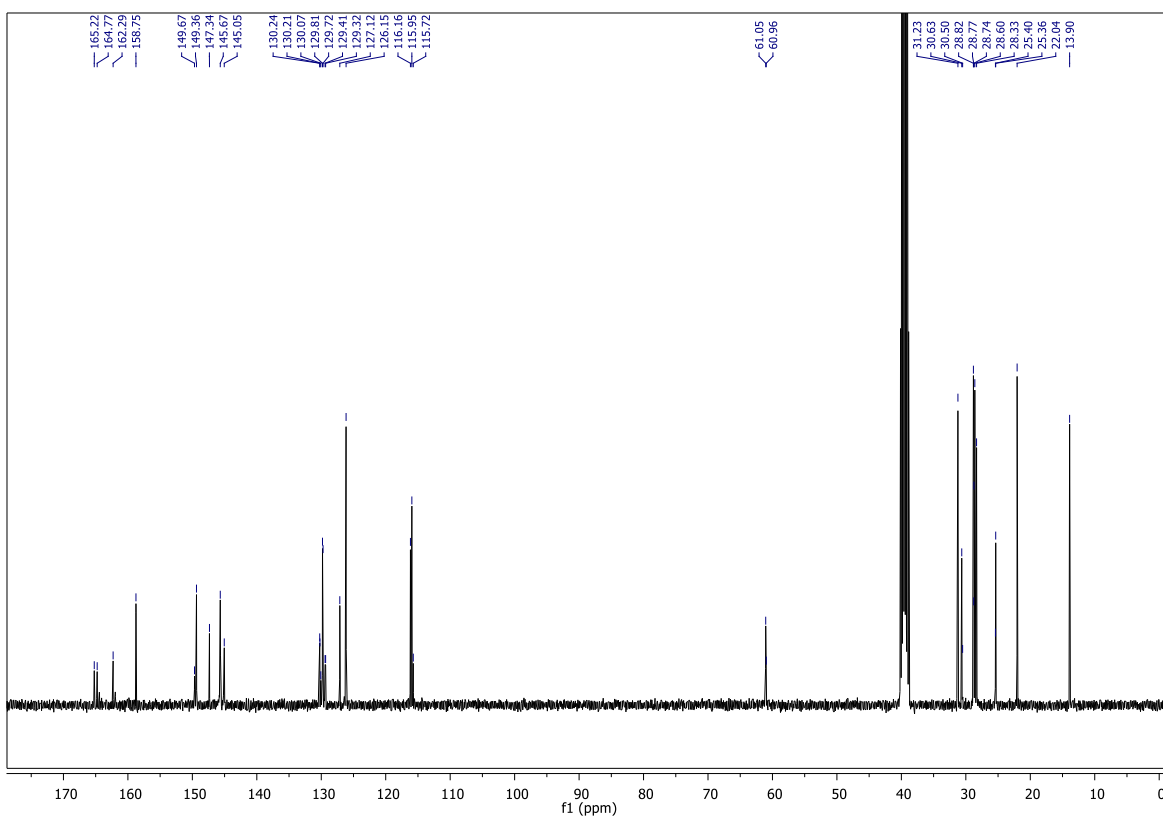

Figure S62. <sup>13</sup>C NMR of Compound 16

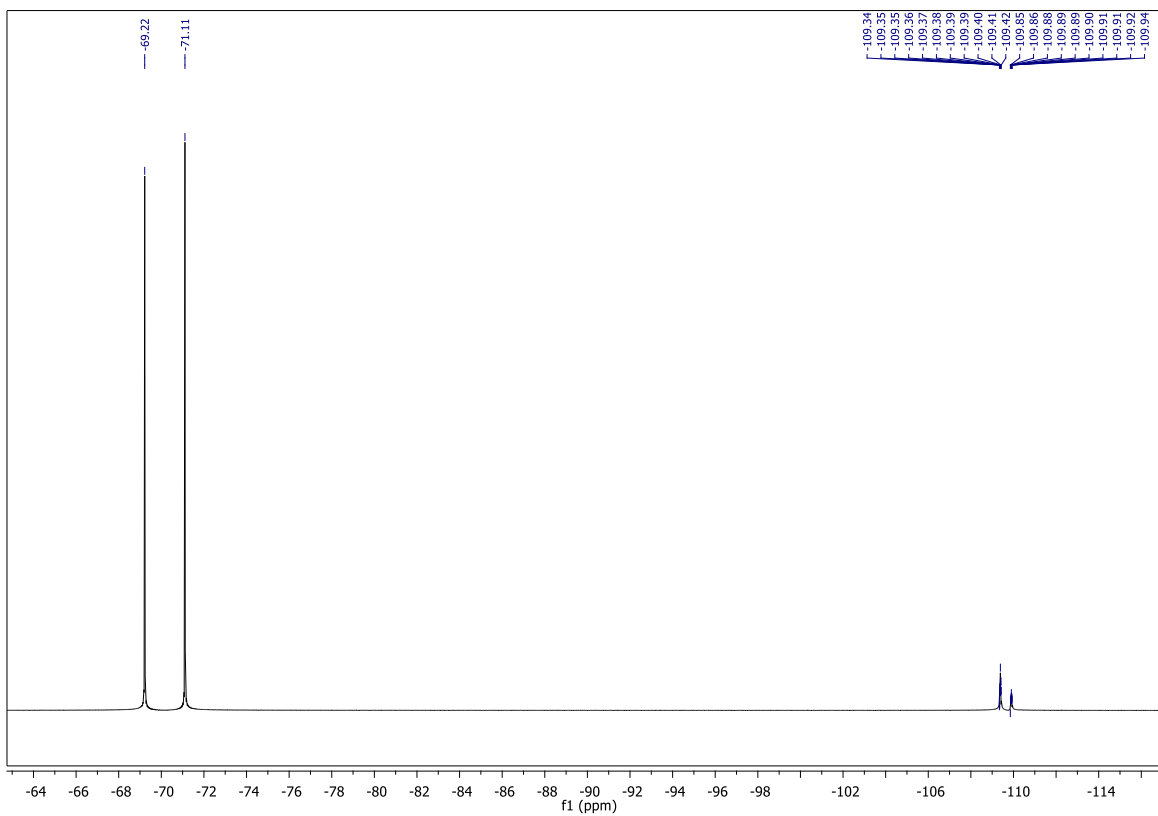

Figure S63.  $^{19}\text{F}$ NMR of Compound 16

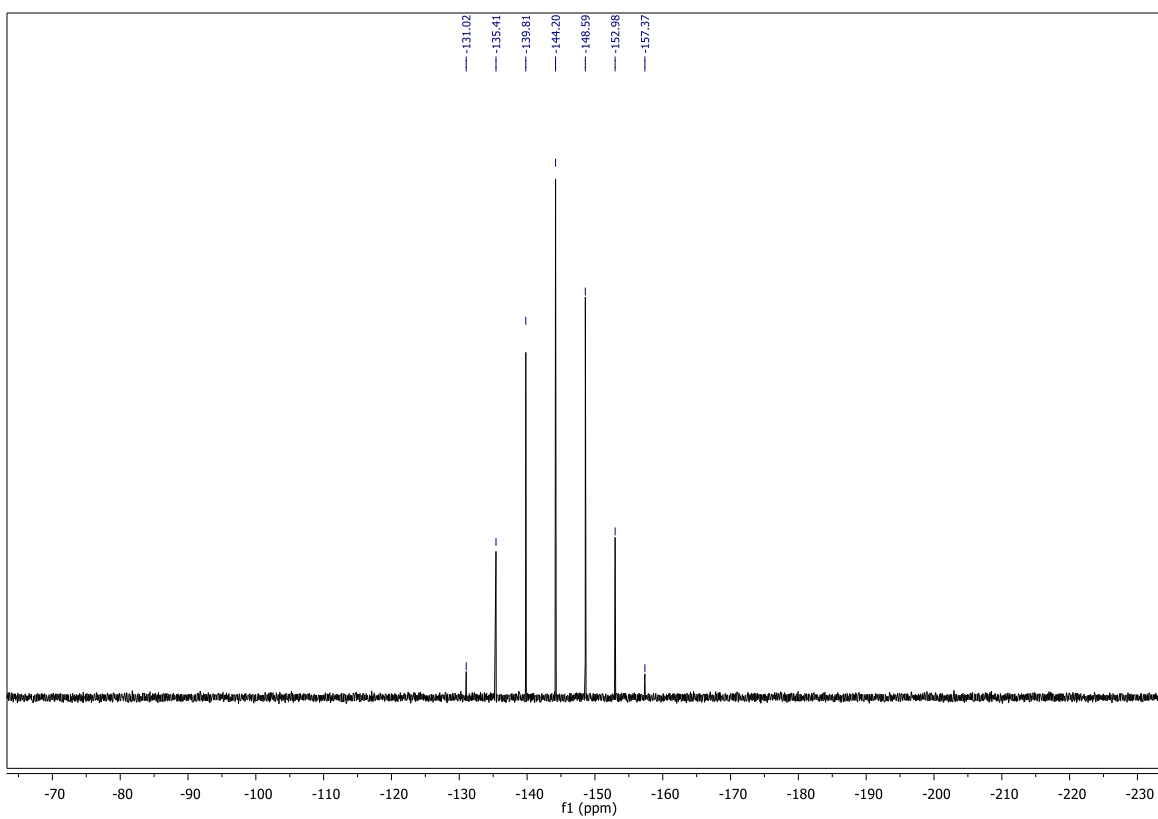

Figure S64.  $^{31}\text{P}$ NMR of Compound 16



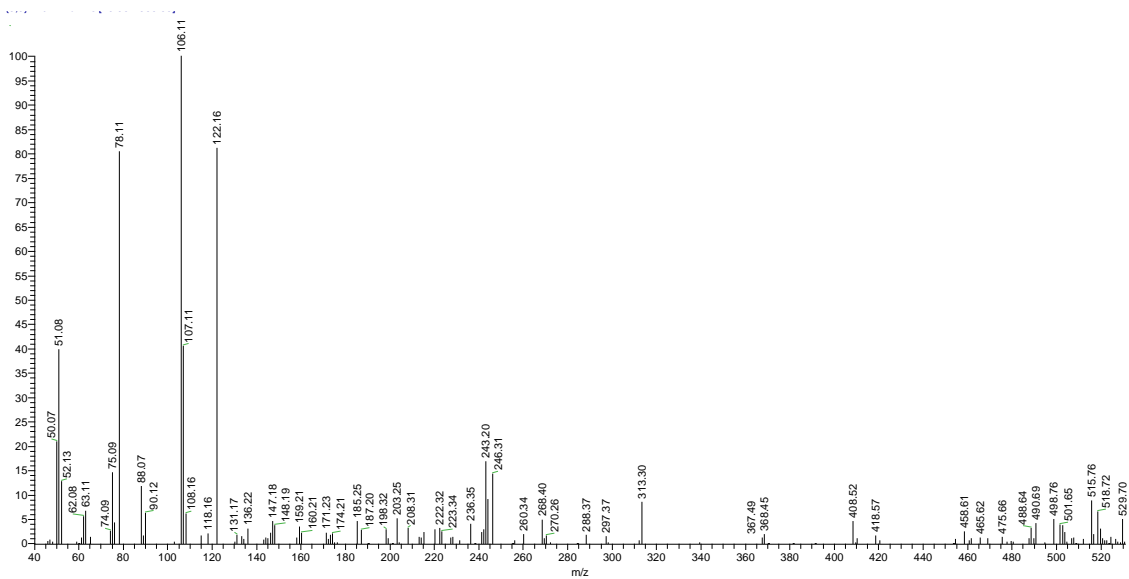

Figure S65. MS (ESI) of Compound 16

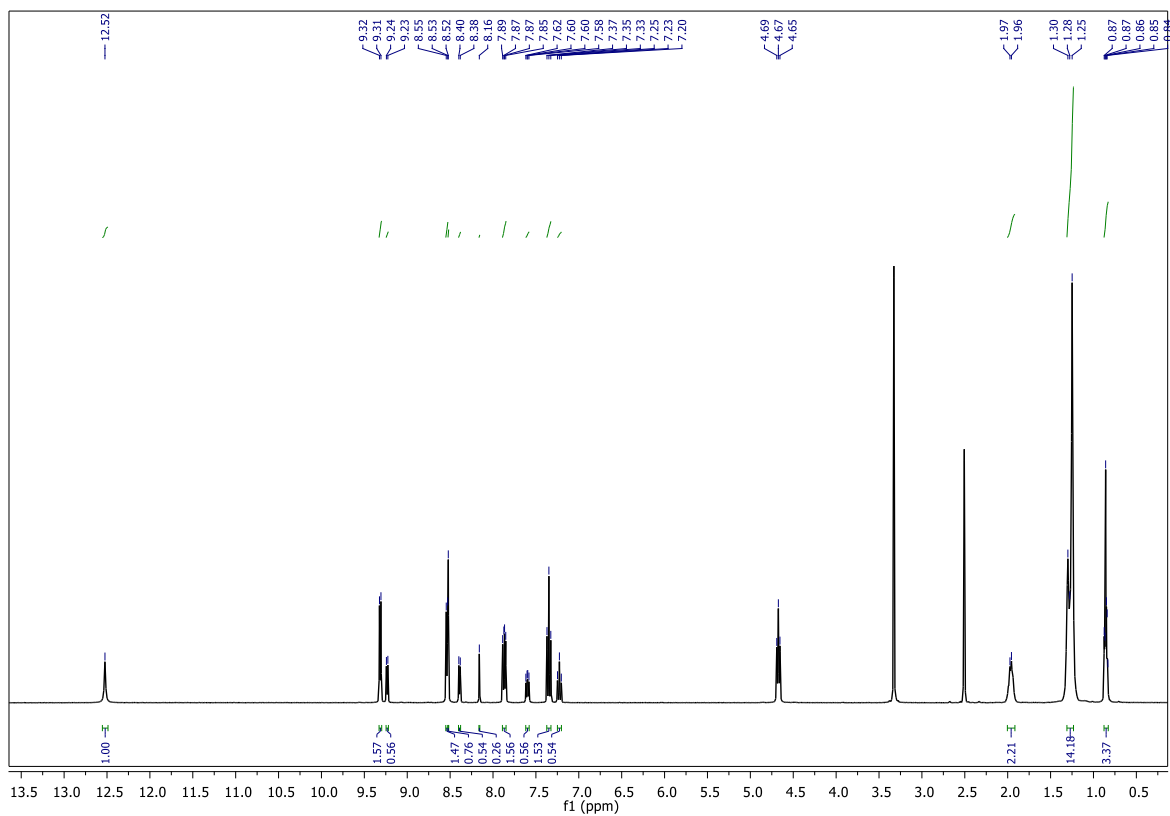

Figure S66. <sup>1</sup>H NMR of Compound 17

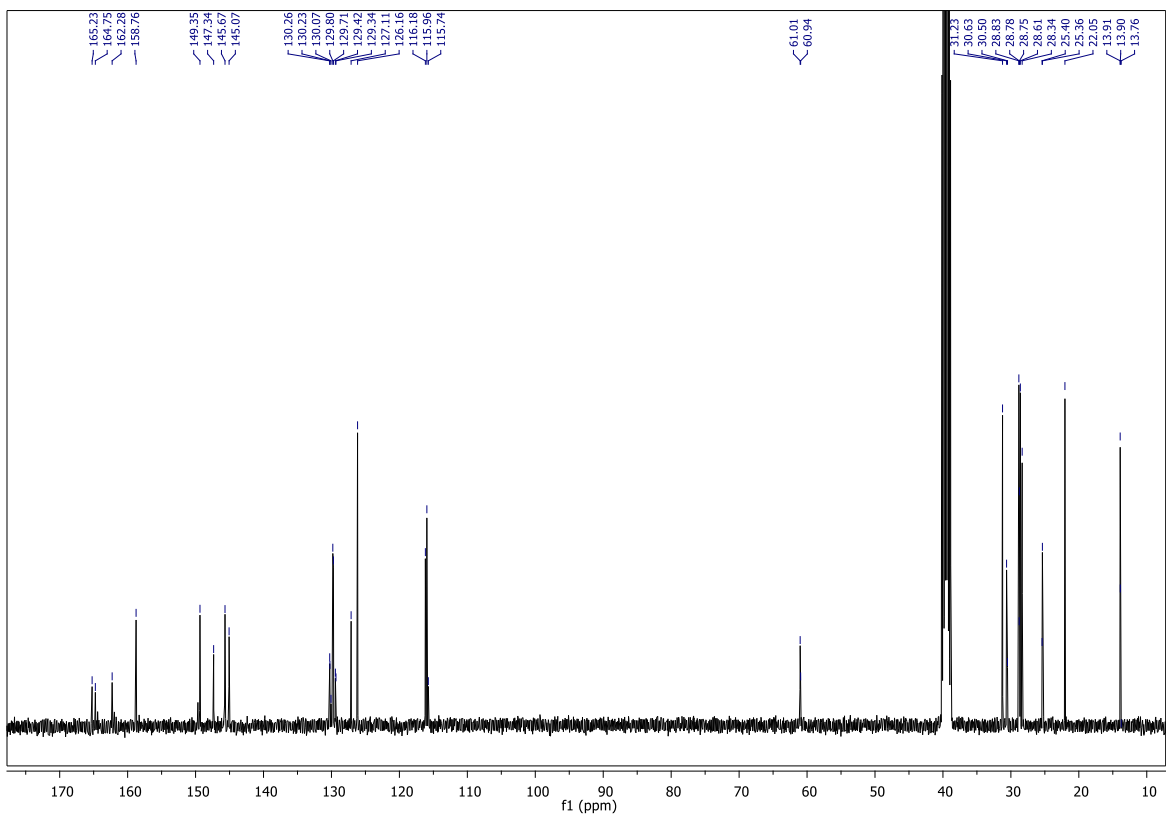

Figure S67.  $^{13}\text{C}$ NMR of Compound 17

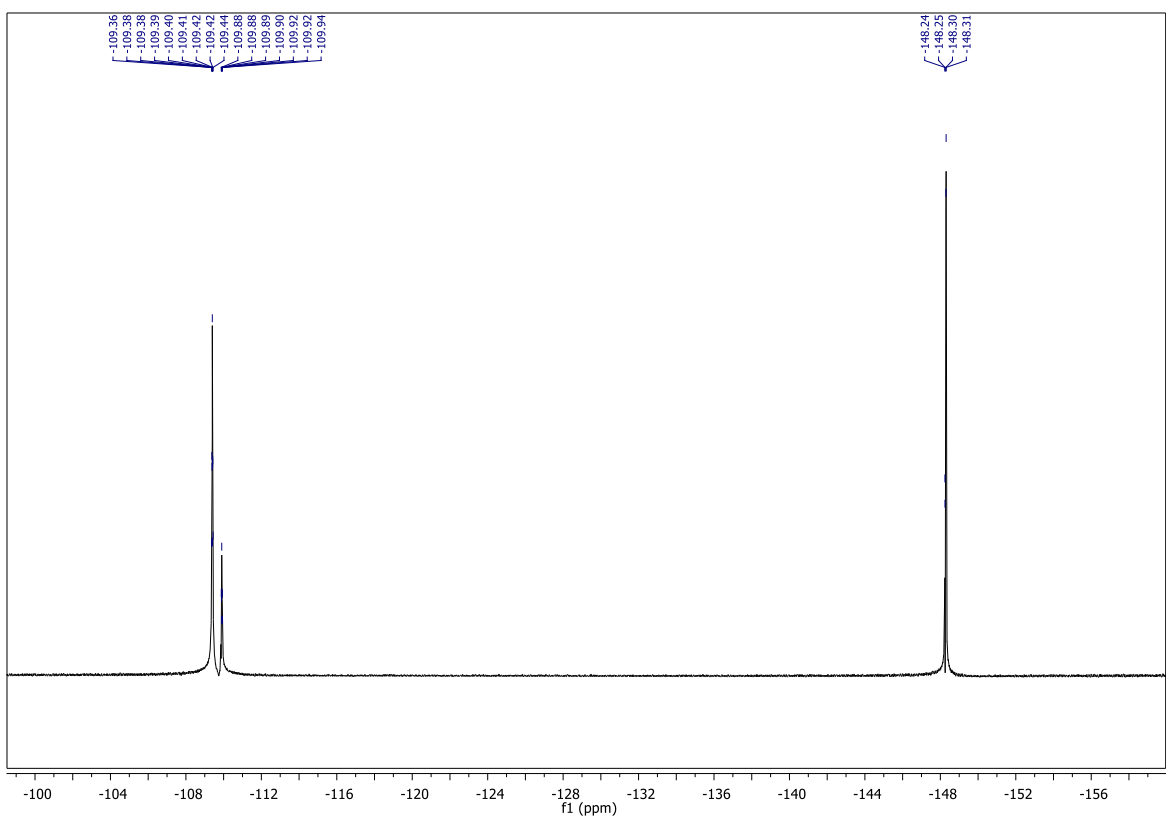

Figure S68.  $^{19}\text{F}$ NMR of Compound 17

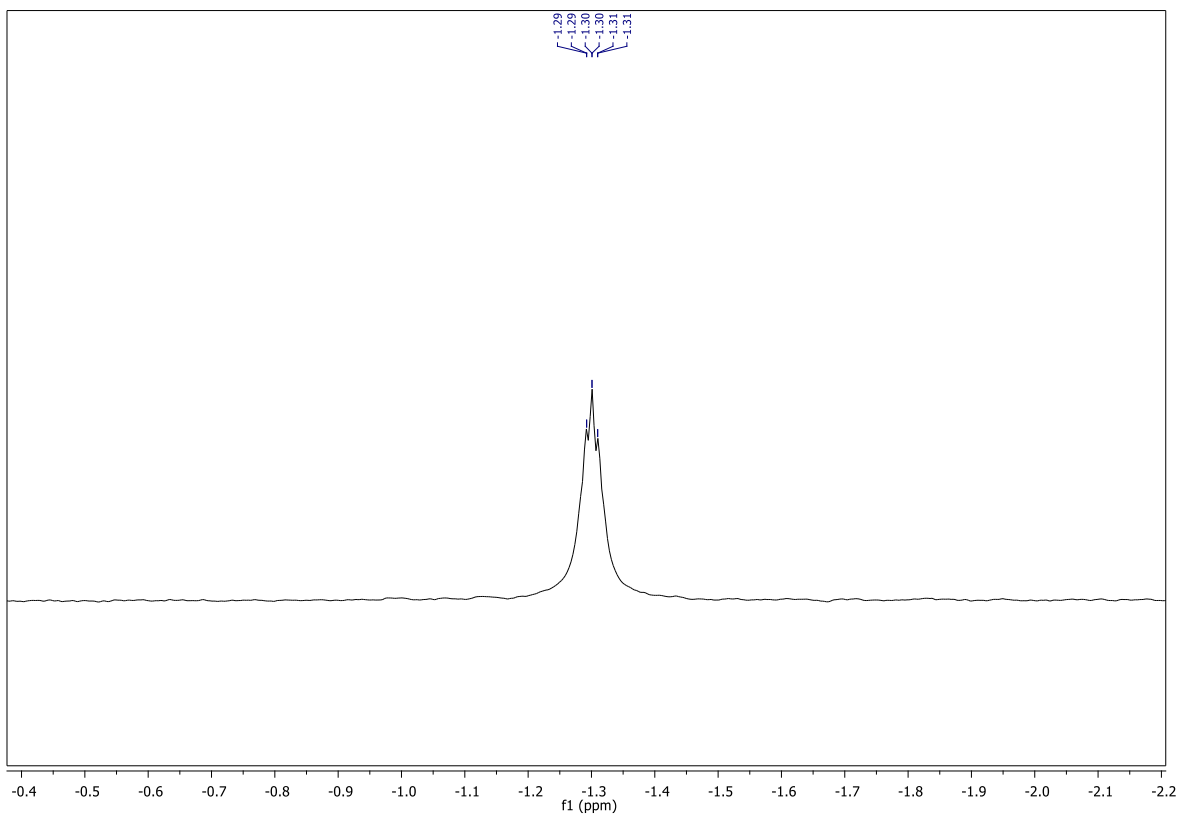

Figure S69.  $^{11}\text{B}$ NMR of Compound 17

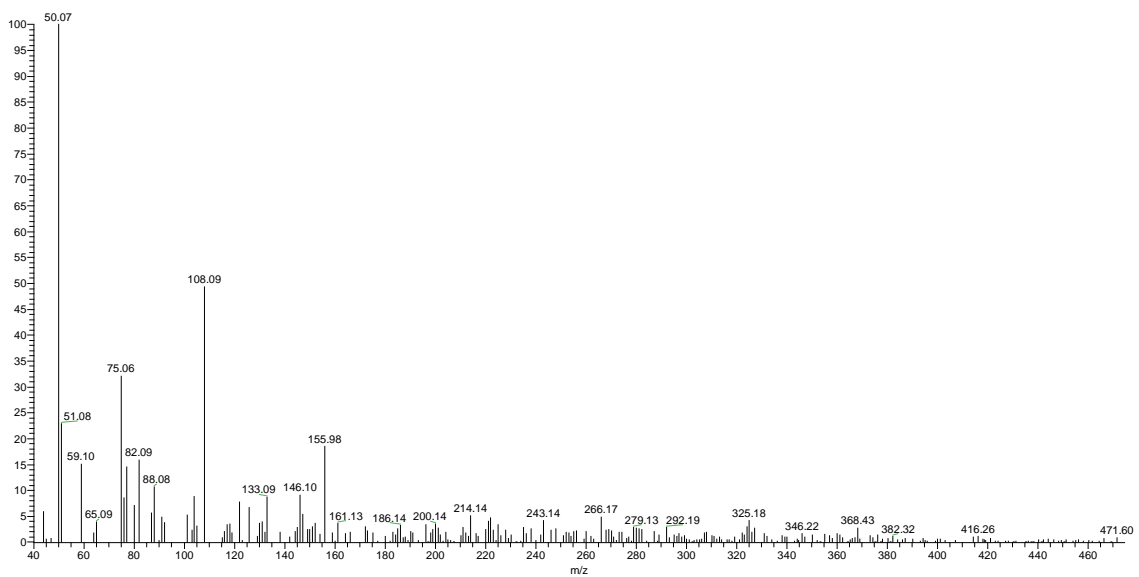

Figure S70. MS (ESI) of Compound 17

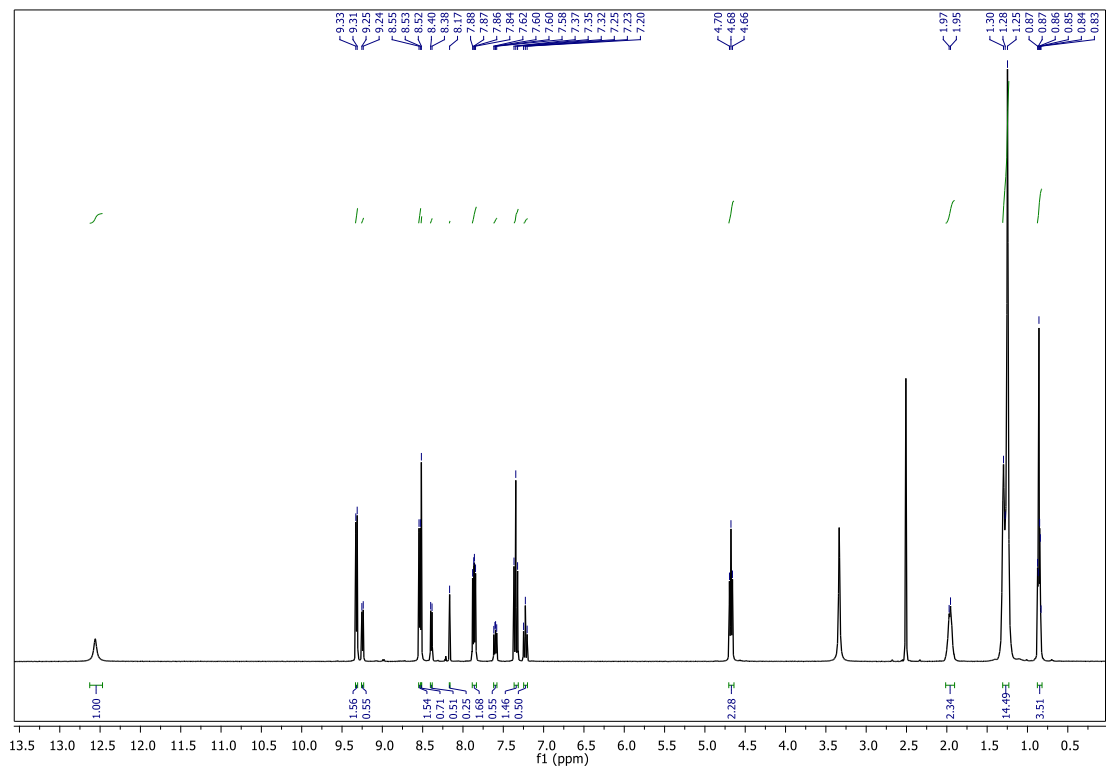

Figure S71. <sup>1</sup>H NMR of Compound 18

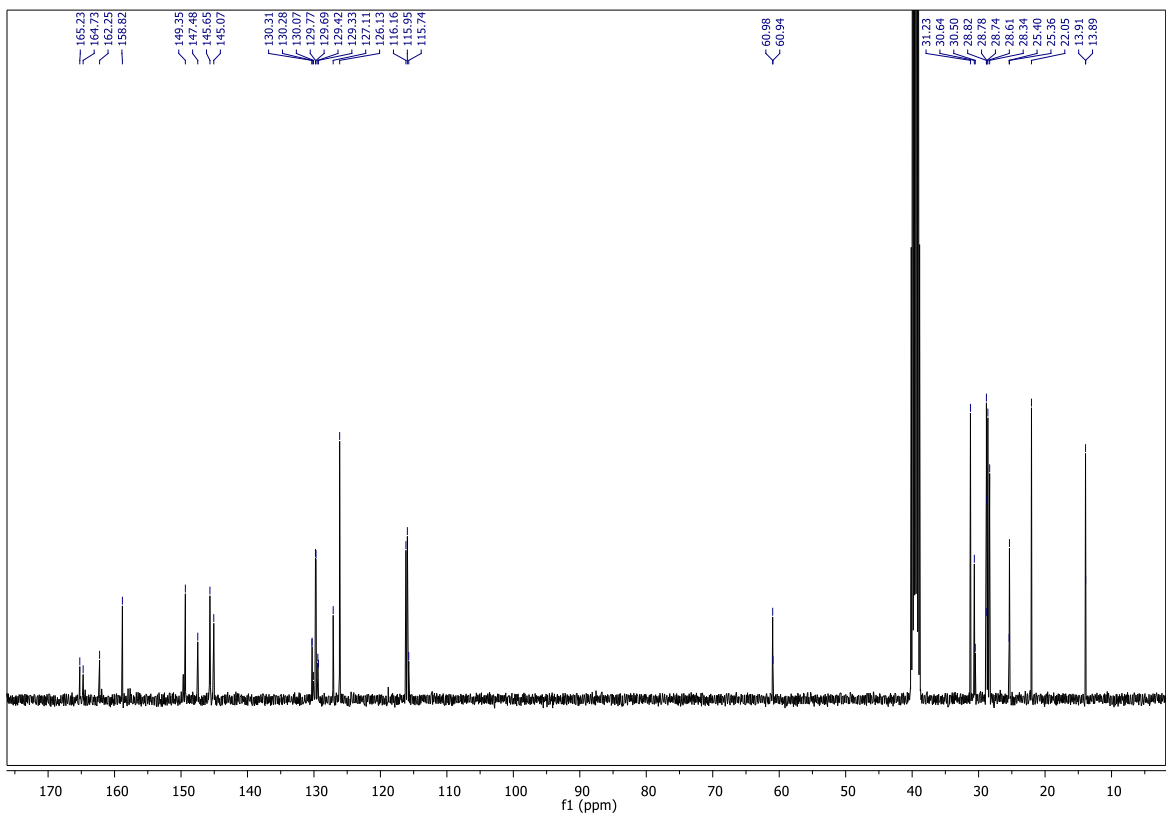

Figure S72. <sup>13</sup>C NMR of Compound 18

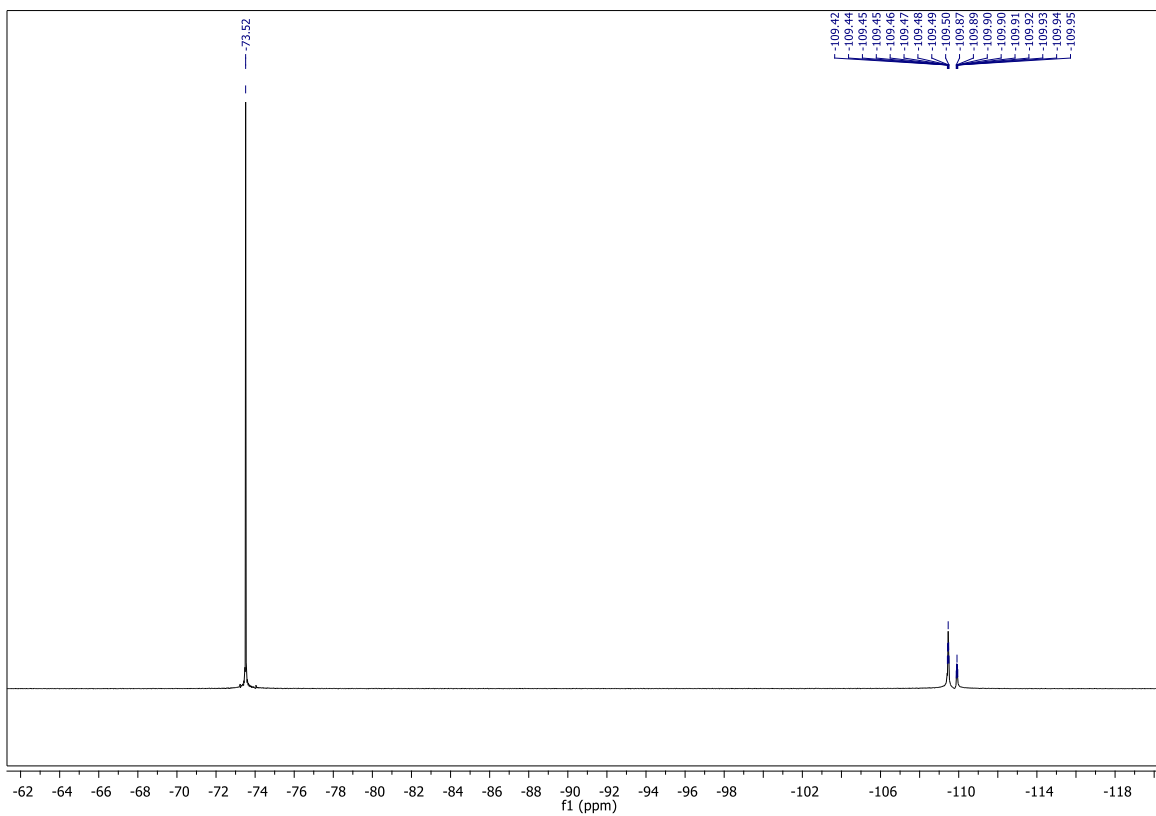

Figure S73.  $^{19}\text{F}$ NMR of Compound 18

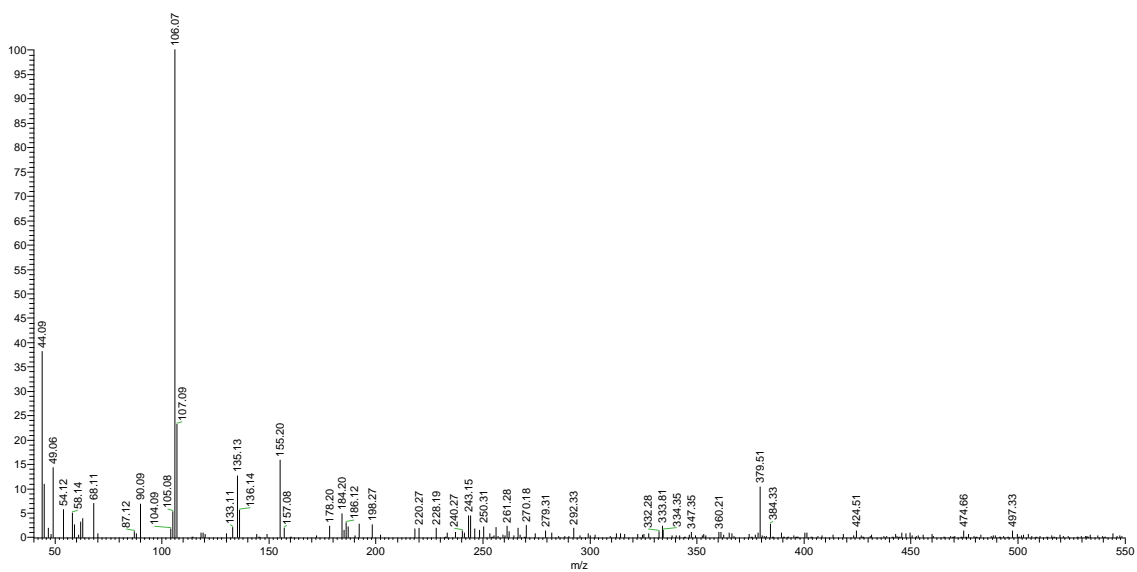

Figure S74. MS (ESI) of Compound 18

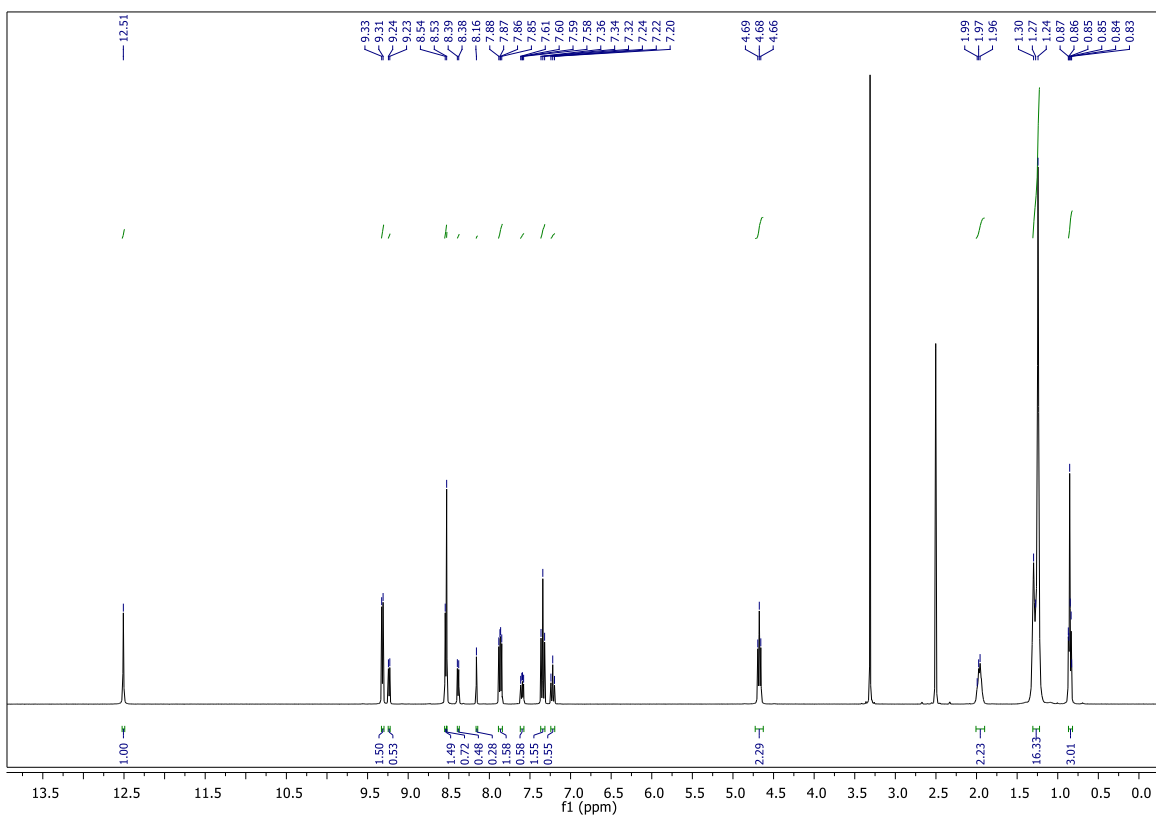

Figure S75. <sup>1</sup>H NMR of Compound 19

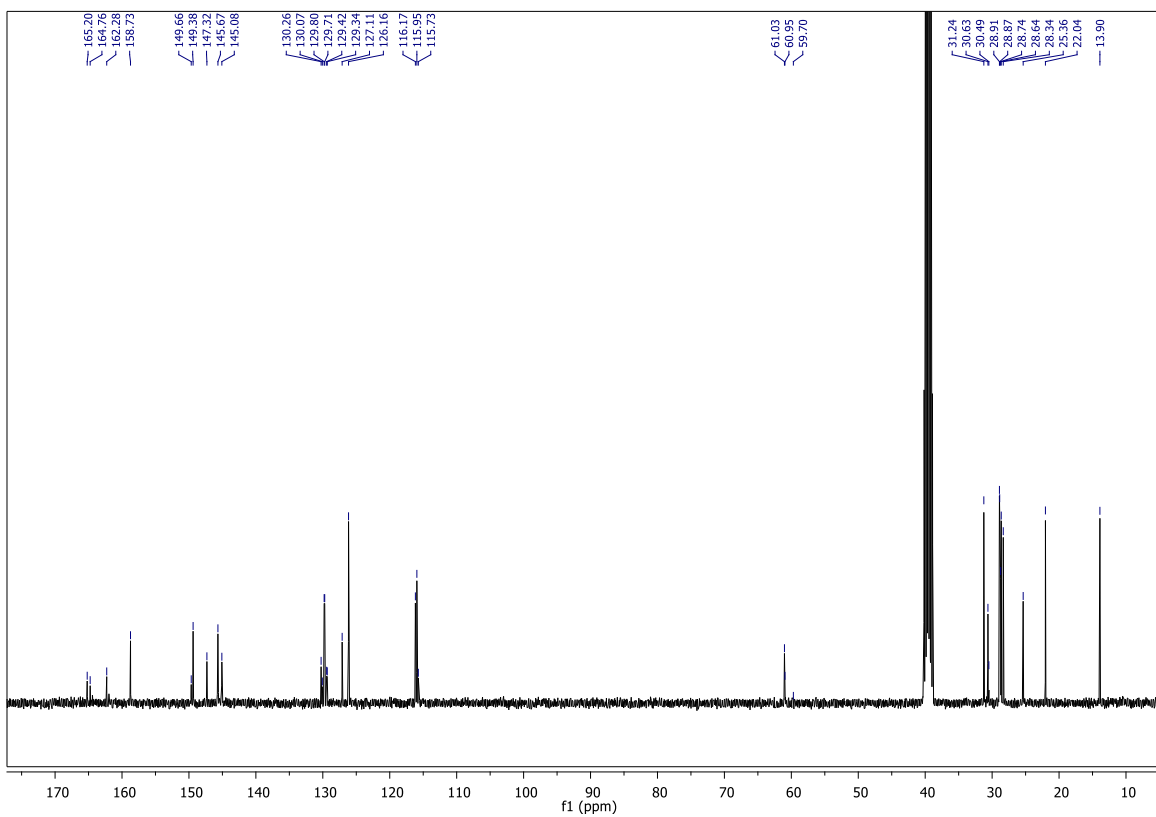

Figure S76. <sup>13</sup>C NMR of Compound 19

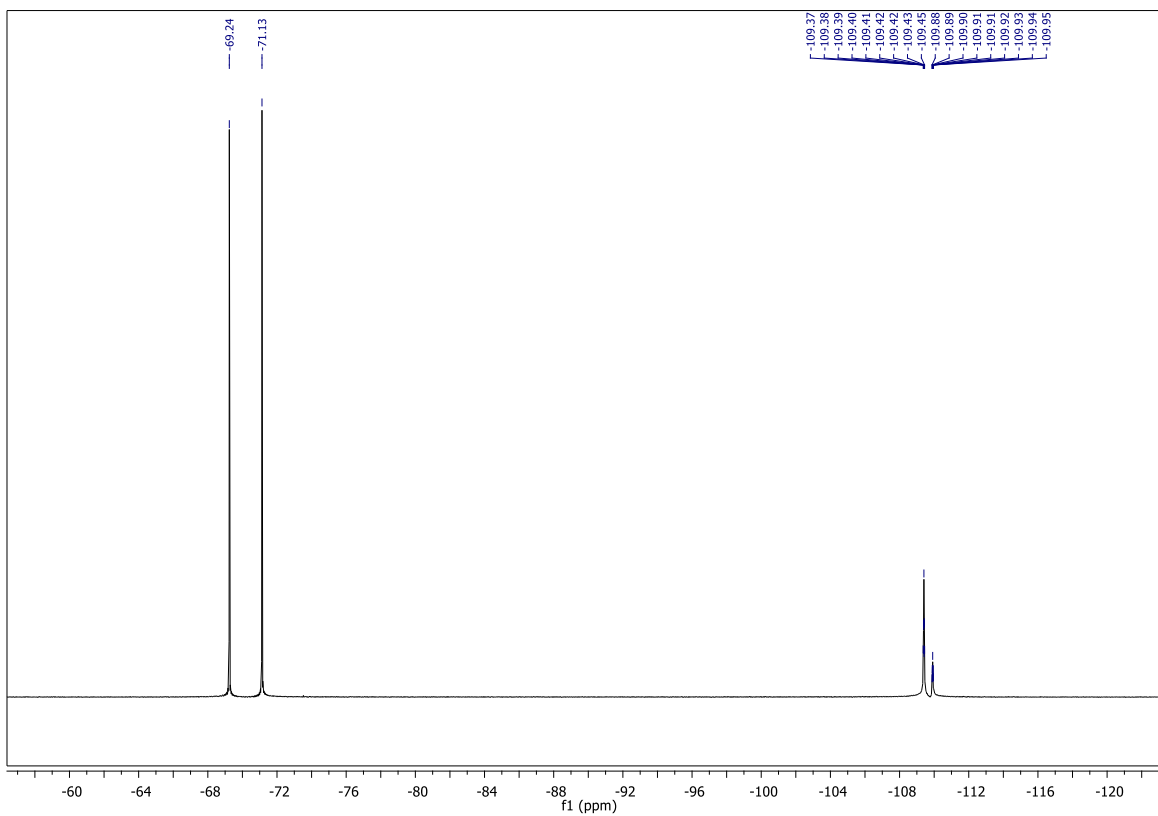

Figure S77. <sup>19</sup>F NMR of Compound 19

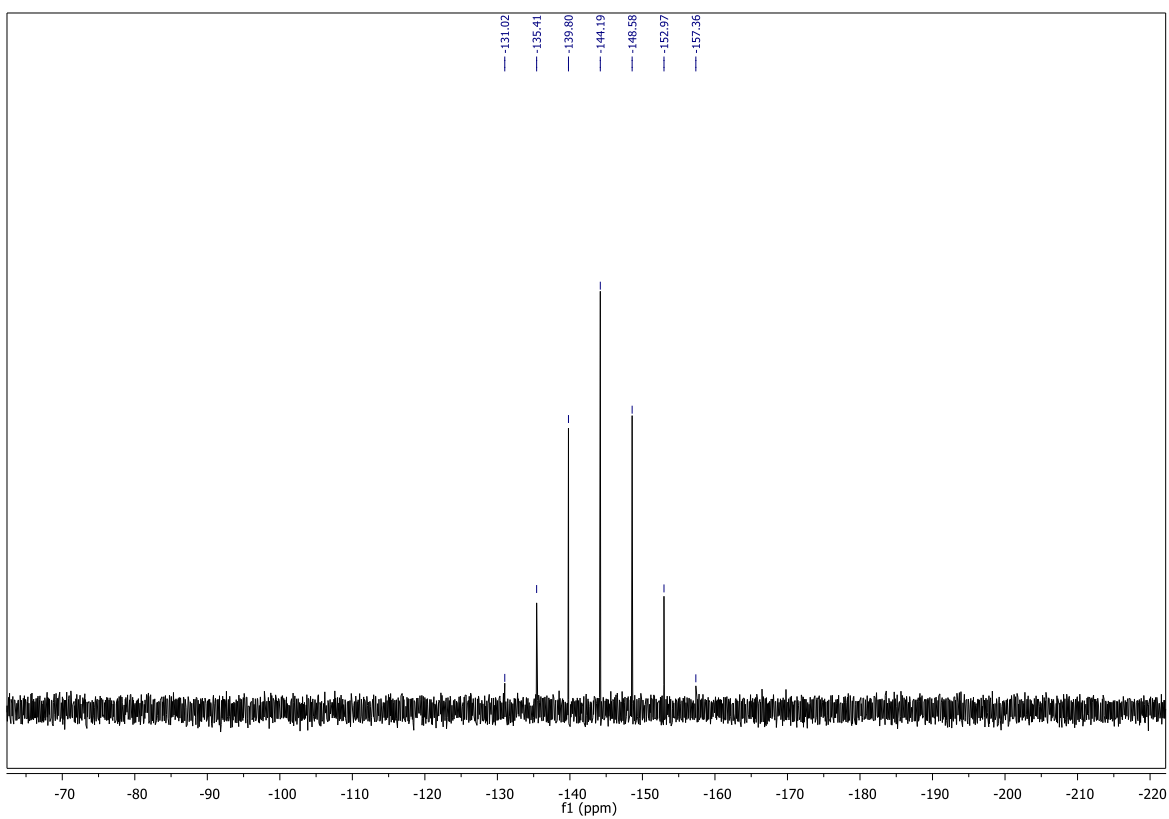

Figure S78. <sup>31</sup>P NMR of Compound 19

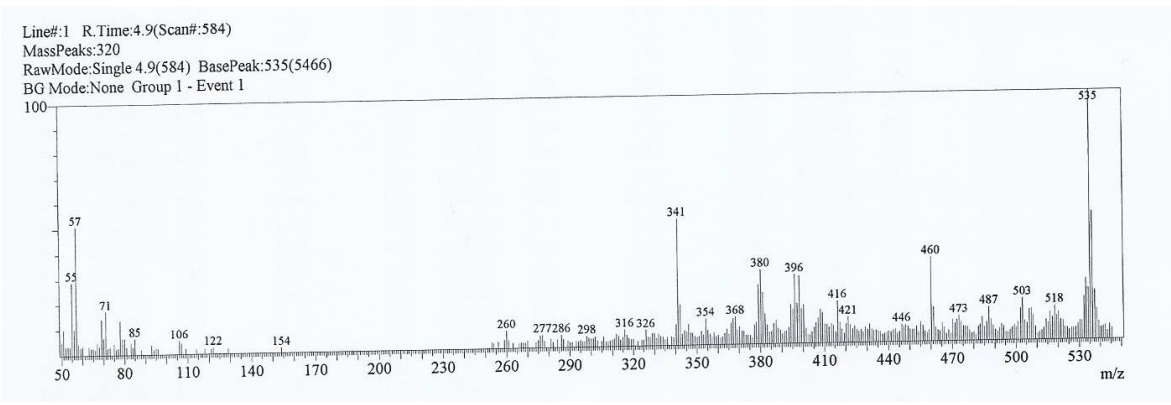

Figure S79. MS (ESI) of Compound 19

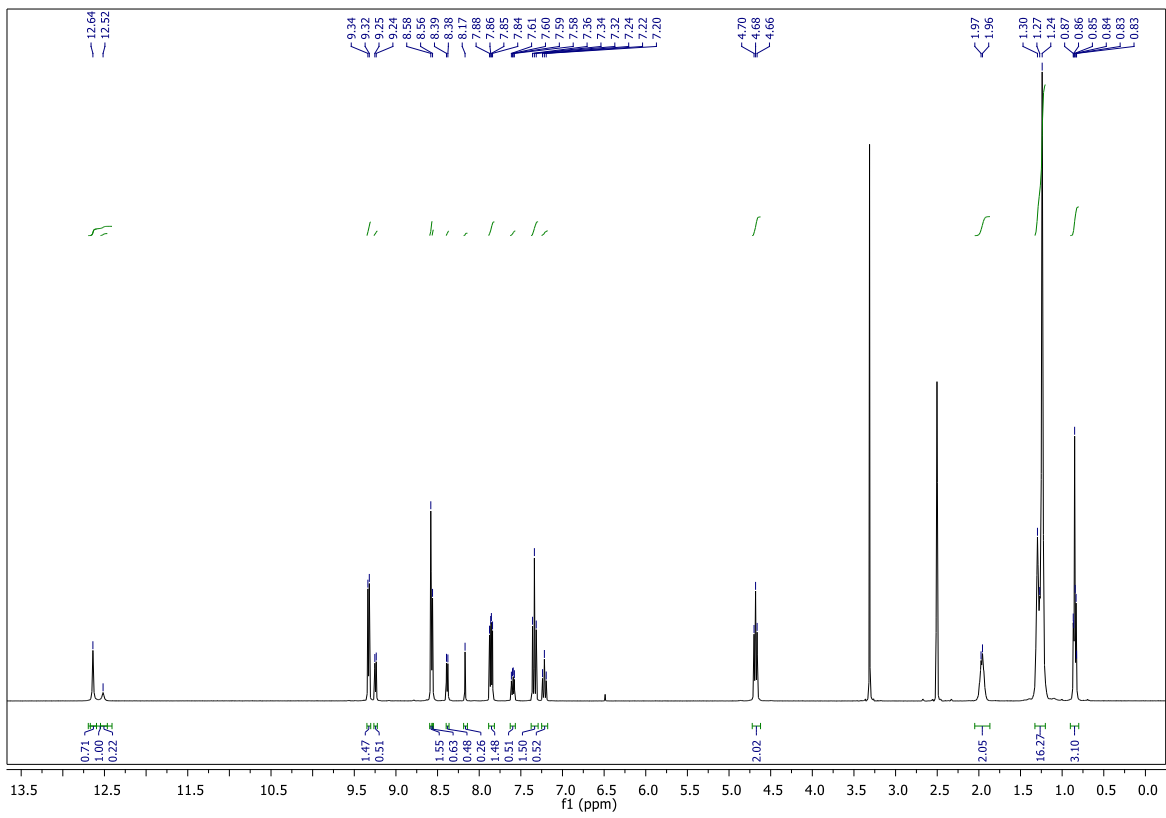

Figure S80. <sup>1</sup>H NMR of Compound 20



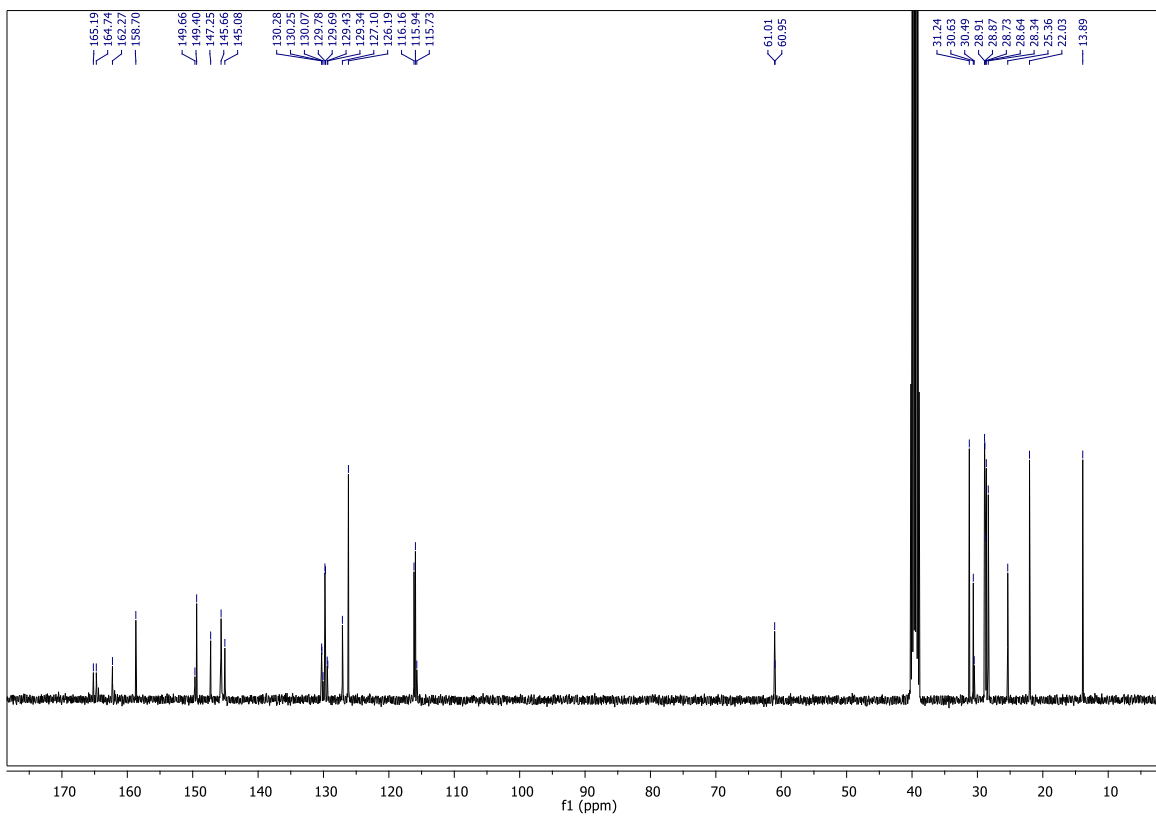

Figure S81.  $^{13}\text{C}$ NMR of Compound 20

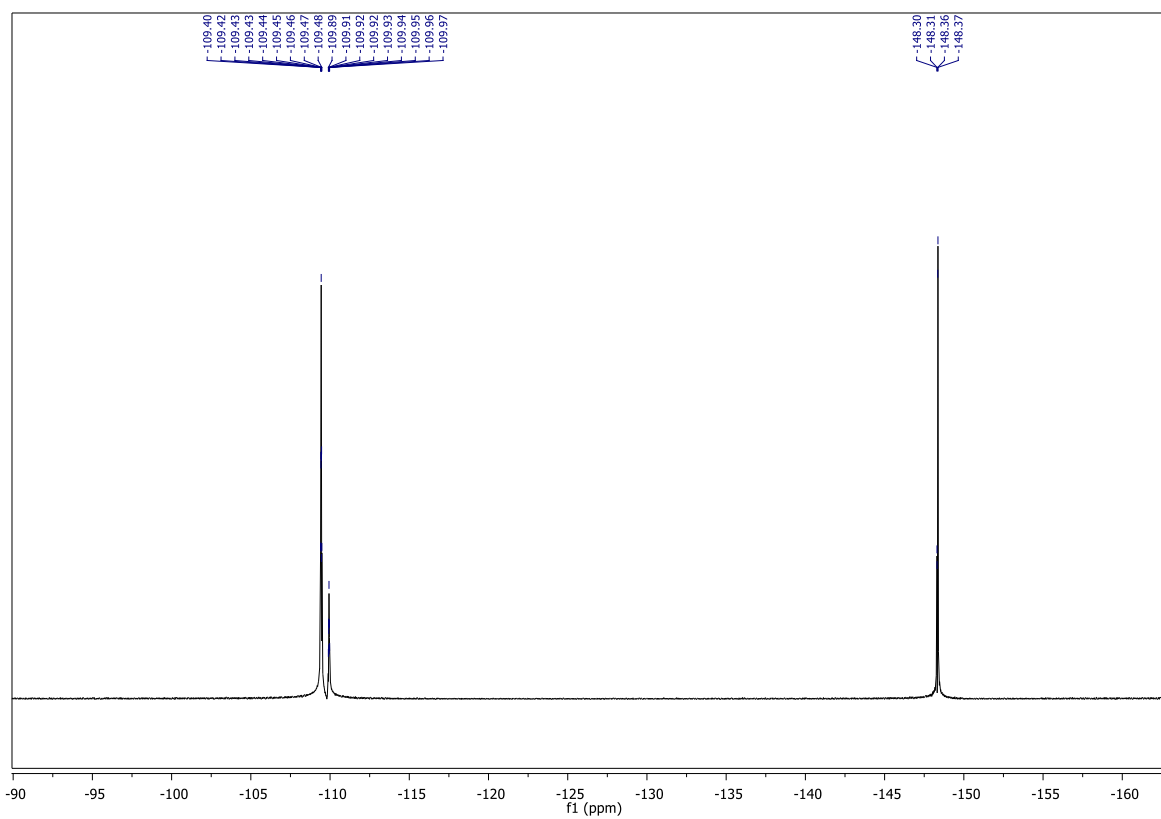

Figure S82.  $^{19}\text{F}$ NMR of Compound 20

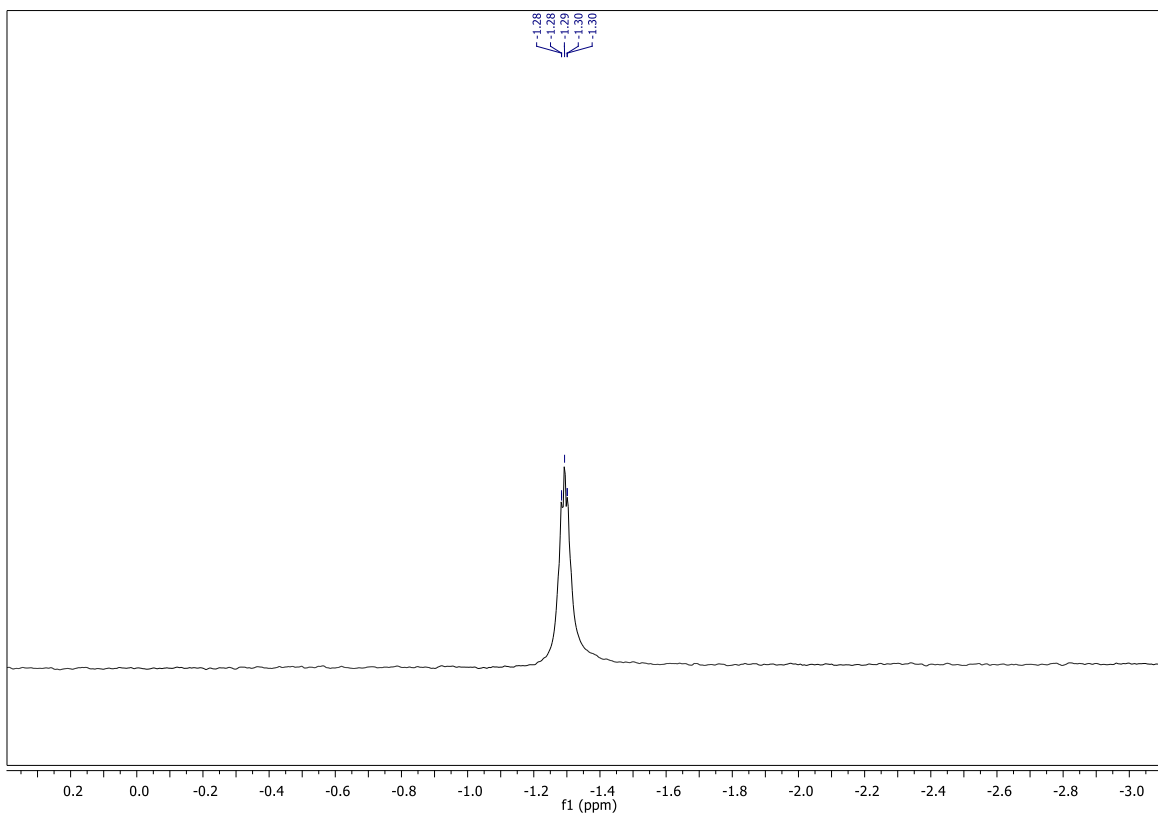

Figure S83.  $^{11}\text{B}$ NMR of Compound 20

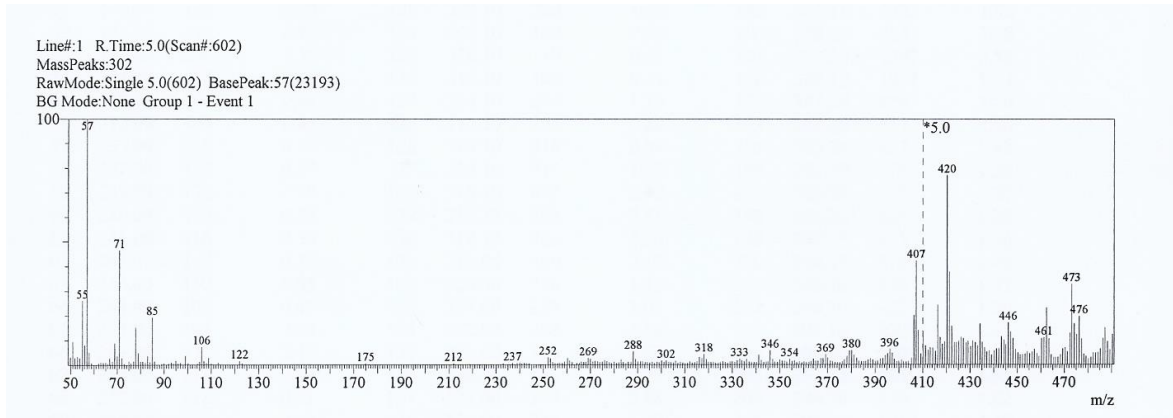

Figure S84. MS (ESI) of Compound 20

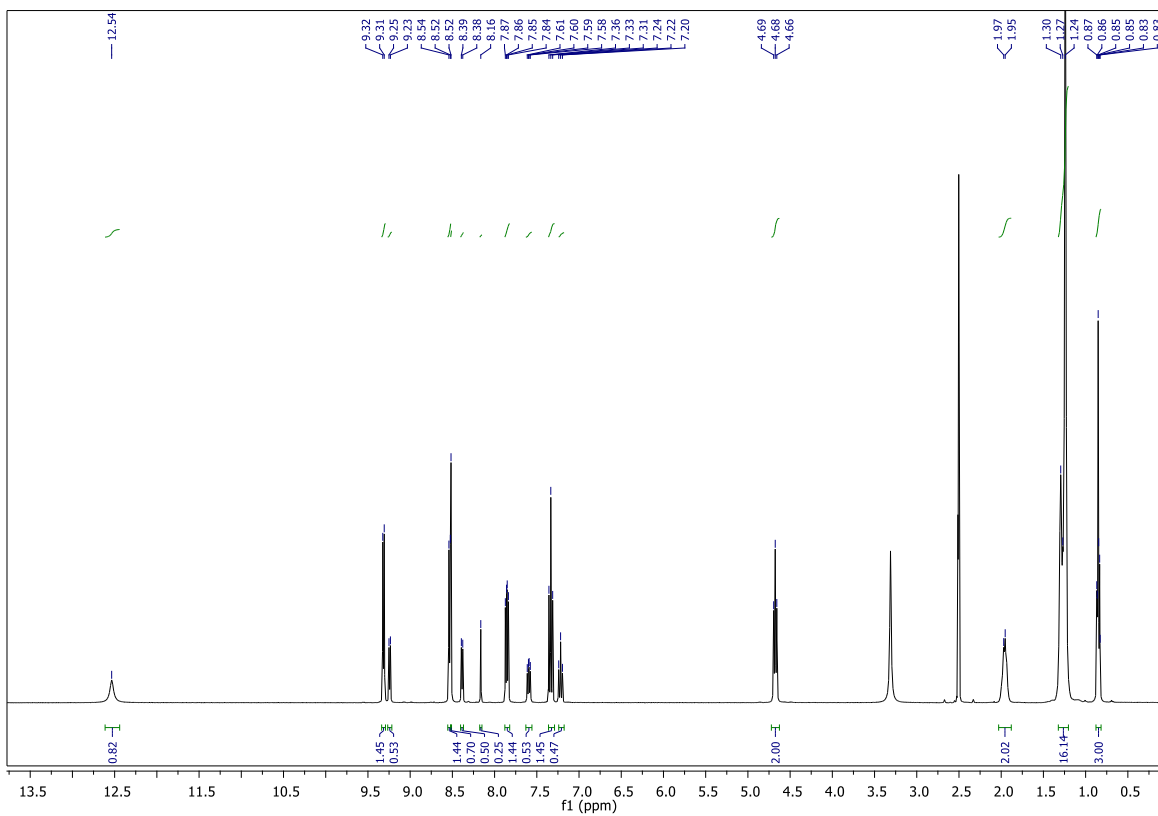

Figure S85.  $^1\text{H}$ NMR of Compound 21

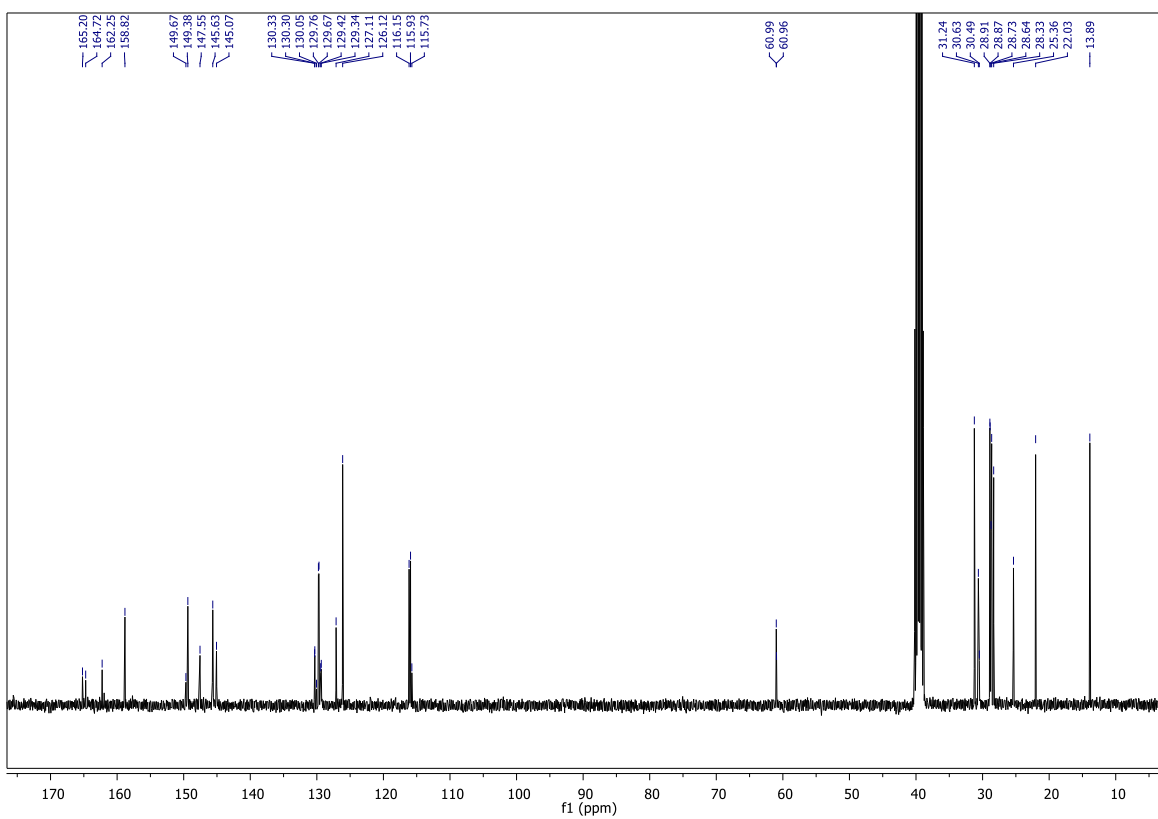

Figure S86.  $^{13}\text{C}$ NMR of Compound 21

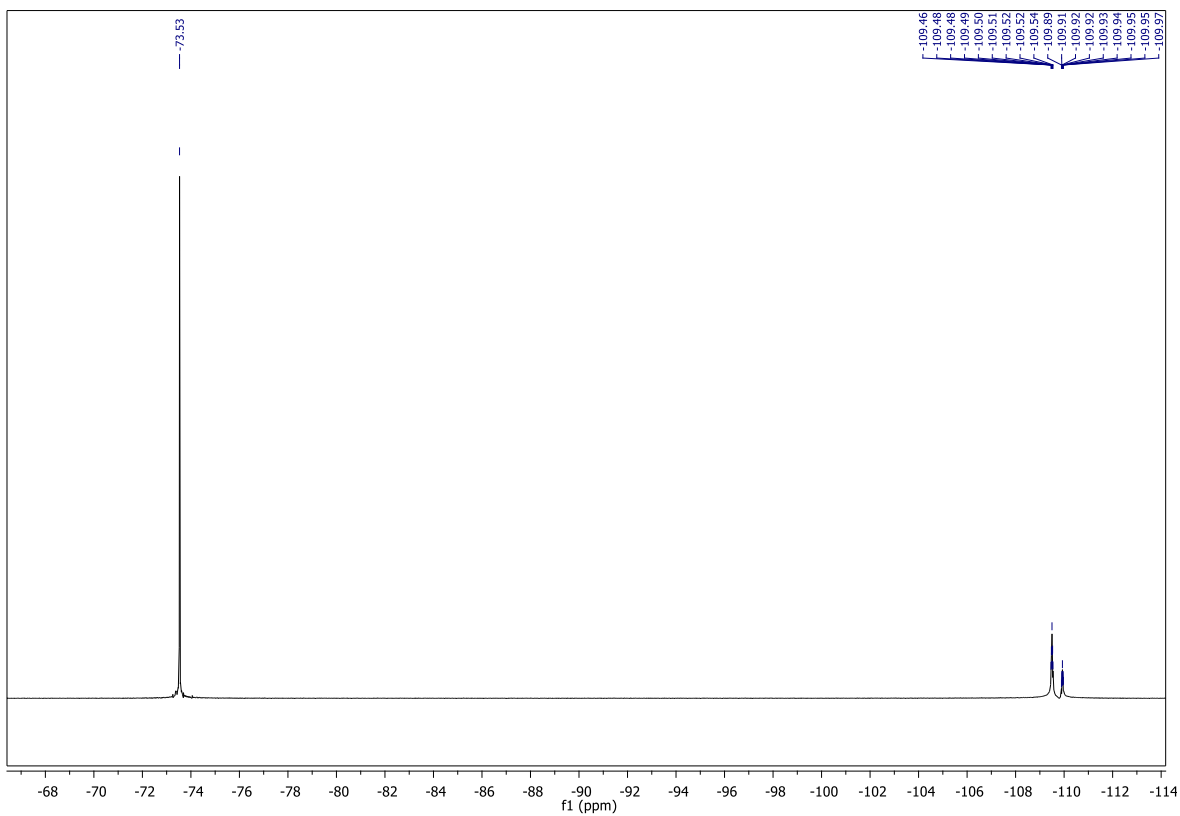

Figure S87. <sup>19</sup>F NMR of Compound 21

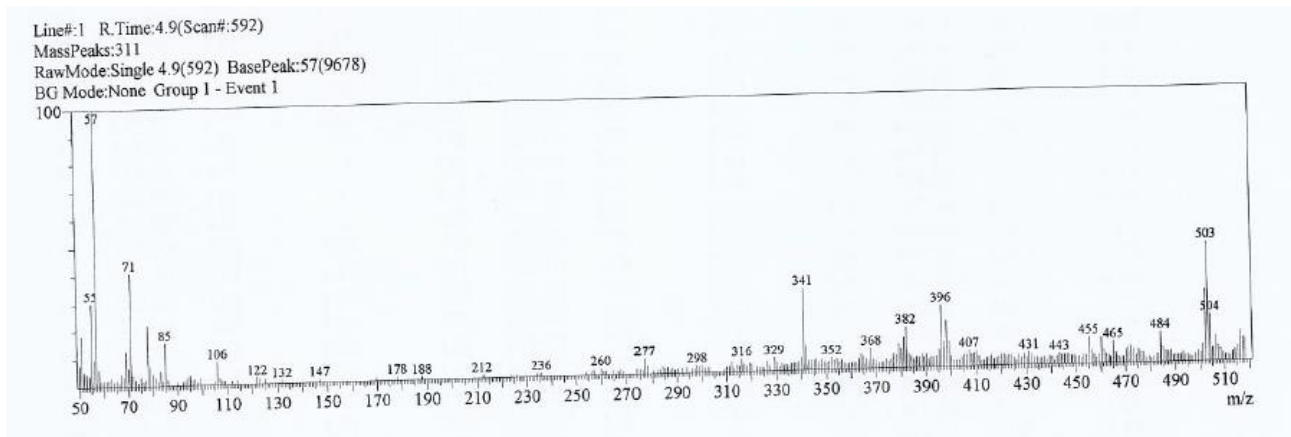

Figure S88. MS (ESI) of Compound 21

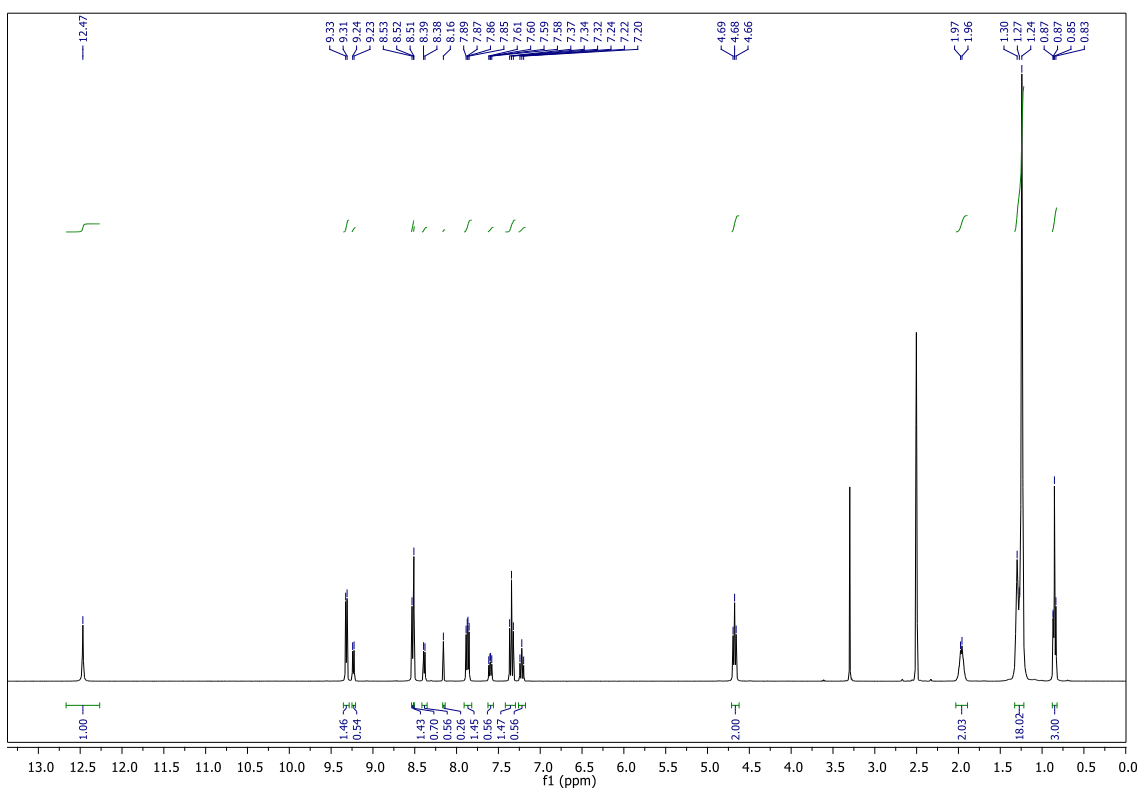

Figure S89. <sup>1</sup>H NMR of Compound 22

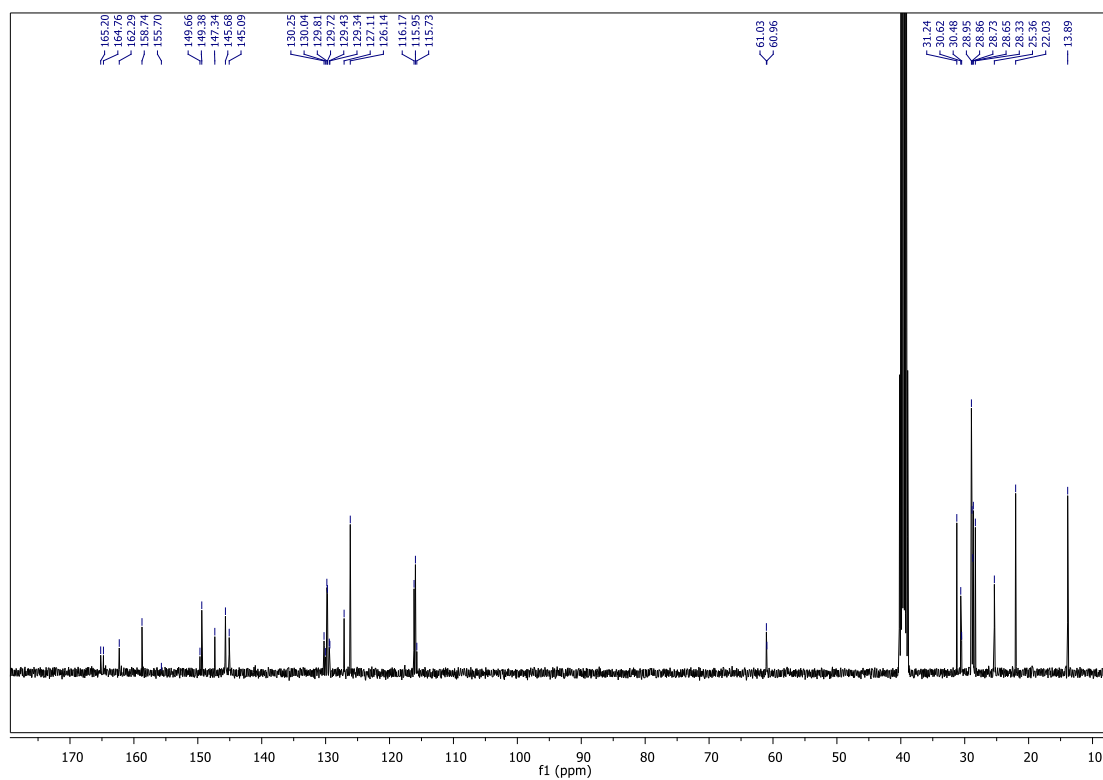

Figure S90. <sup>13</sup>C NMR of Compound 22

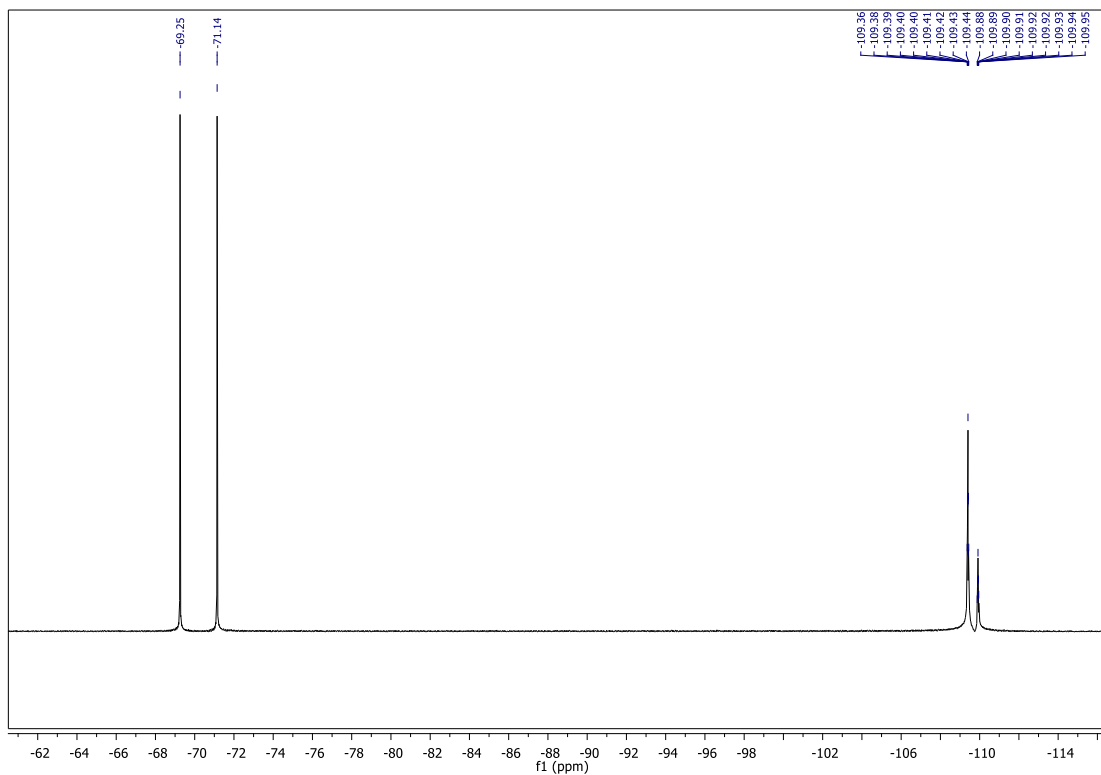

Figure S91.  $^{19}\text{F}$ NMR of Compound 22

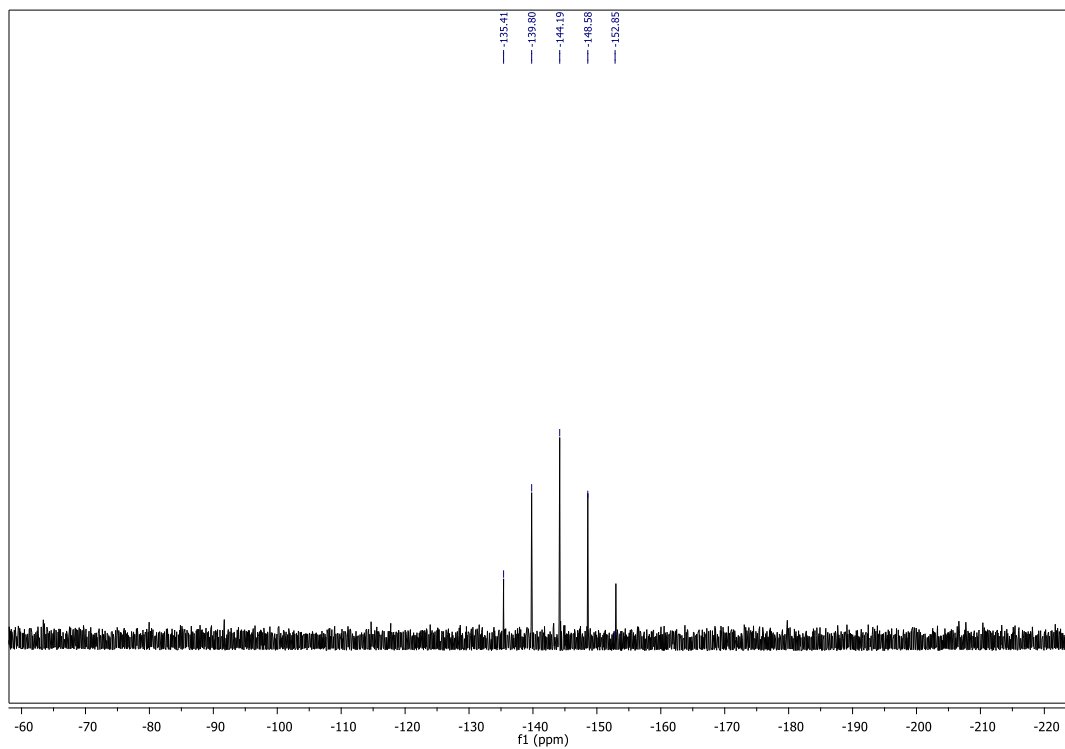

Figure S92.  $^{31}\text{P}$ NMR of Compound 22

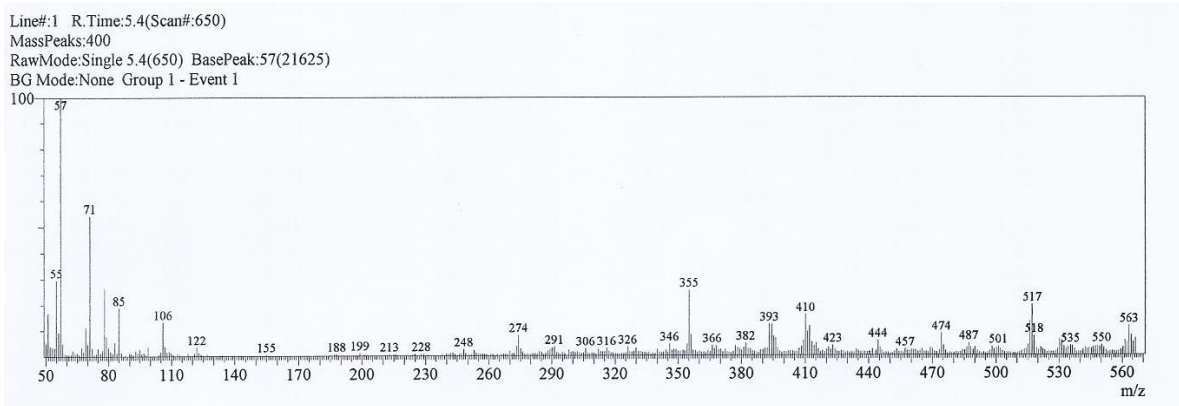

Figure S93. MS (ESI) of Compound 22

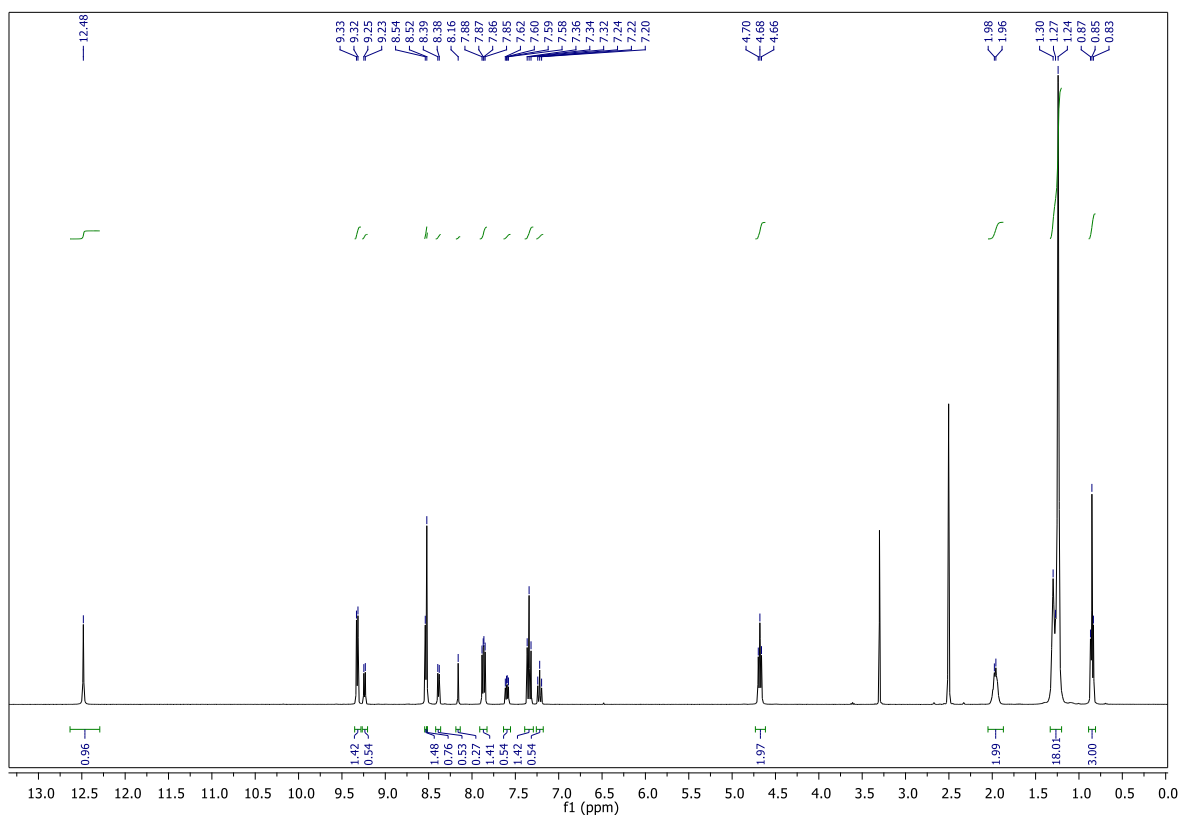

Figure S94. <sup>1</sup>H NMR of Compound 23

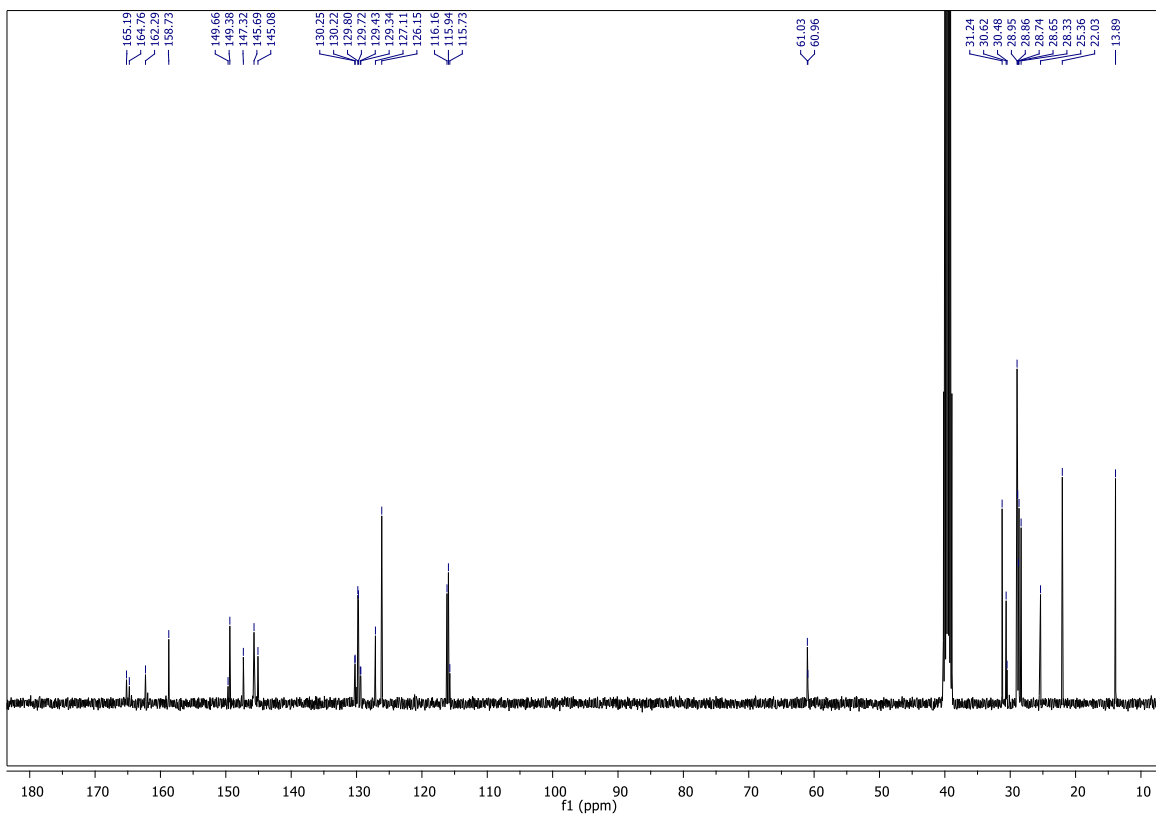

Figure S95.  $^{13}\text{C}$ NMR of Compound 23

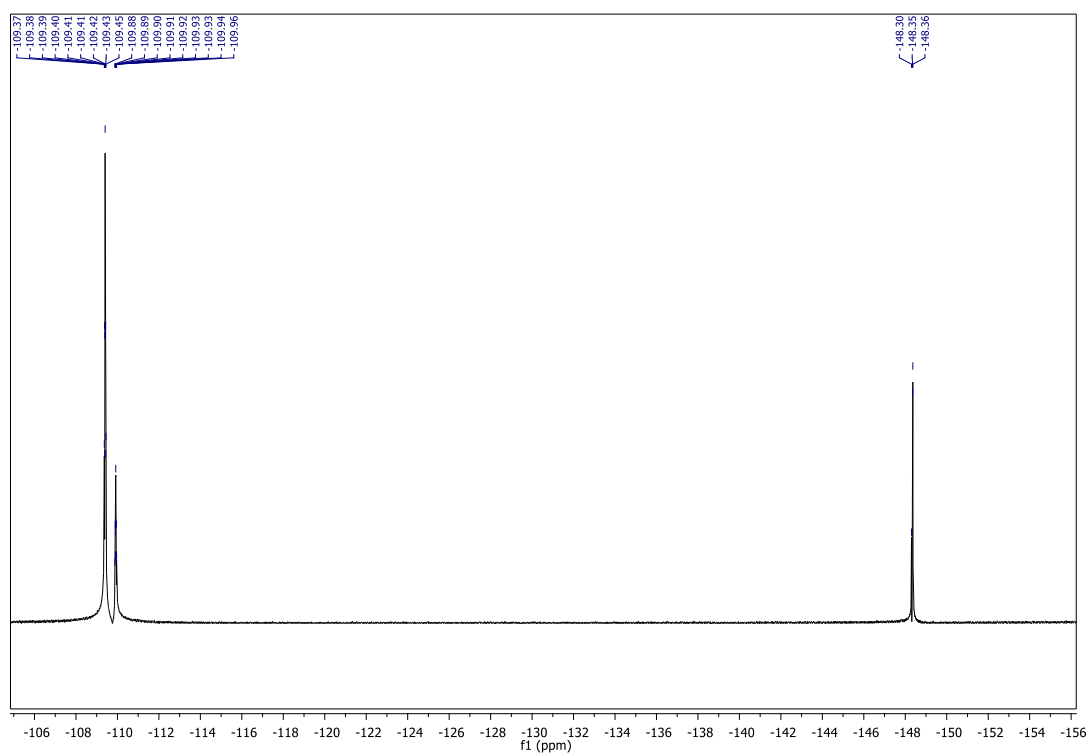

Figure S96.  $^{19}\text{F}$ NMR of Compound 23



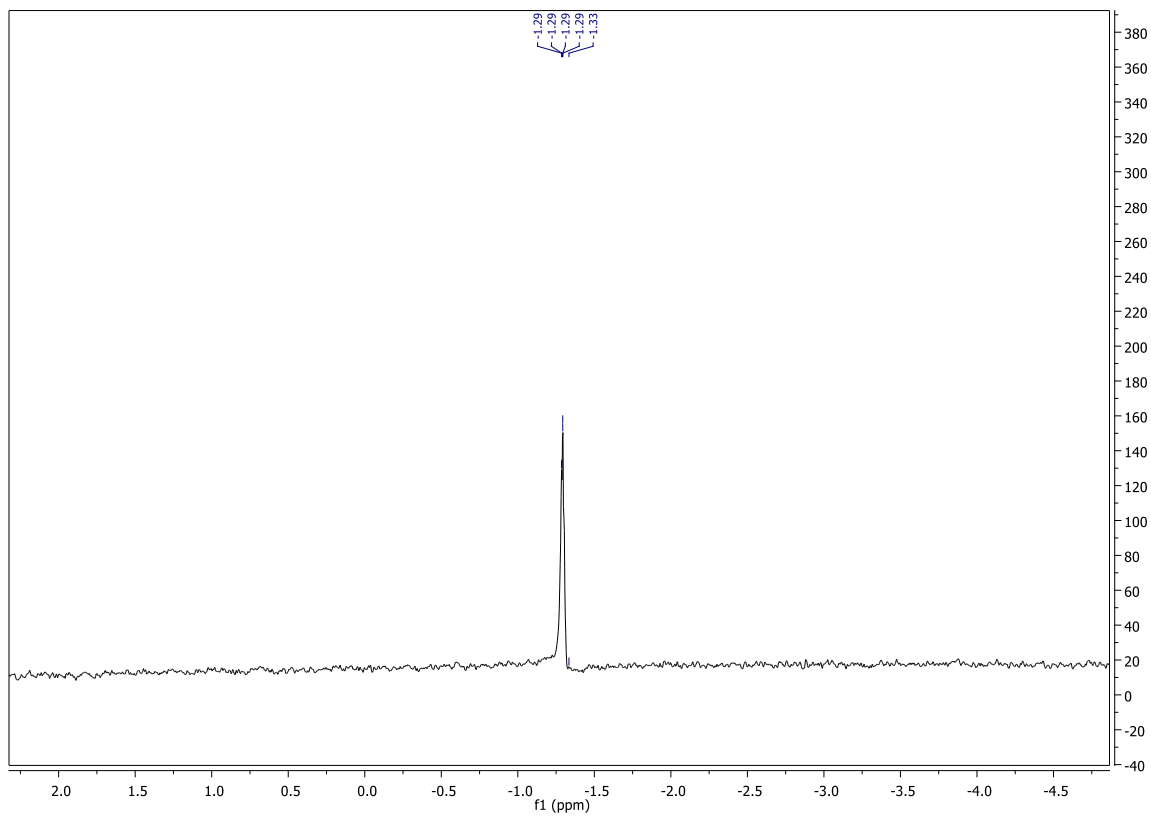

Figure S97.  $^{11}\text{B}$ NMR of Compound 23

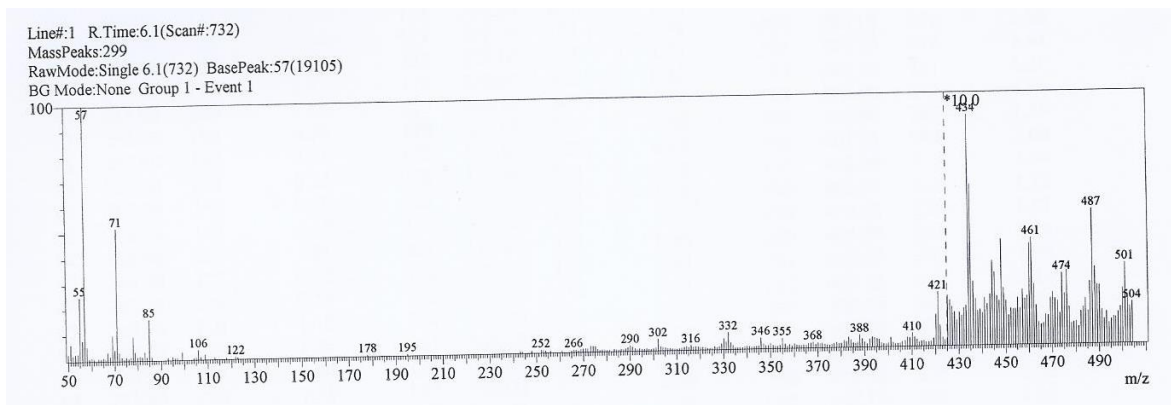

Figure S98. MS (ESI) of Compound 23

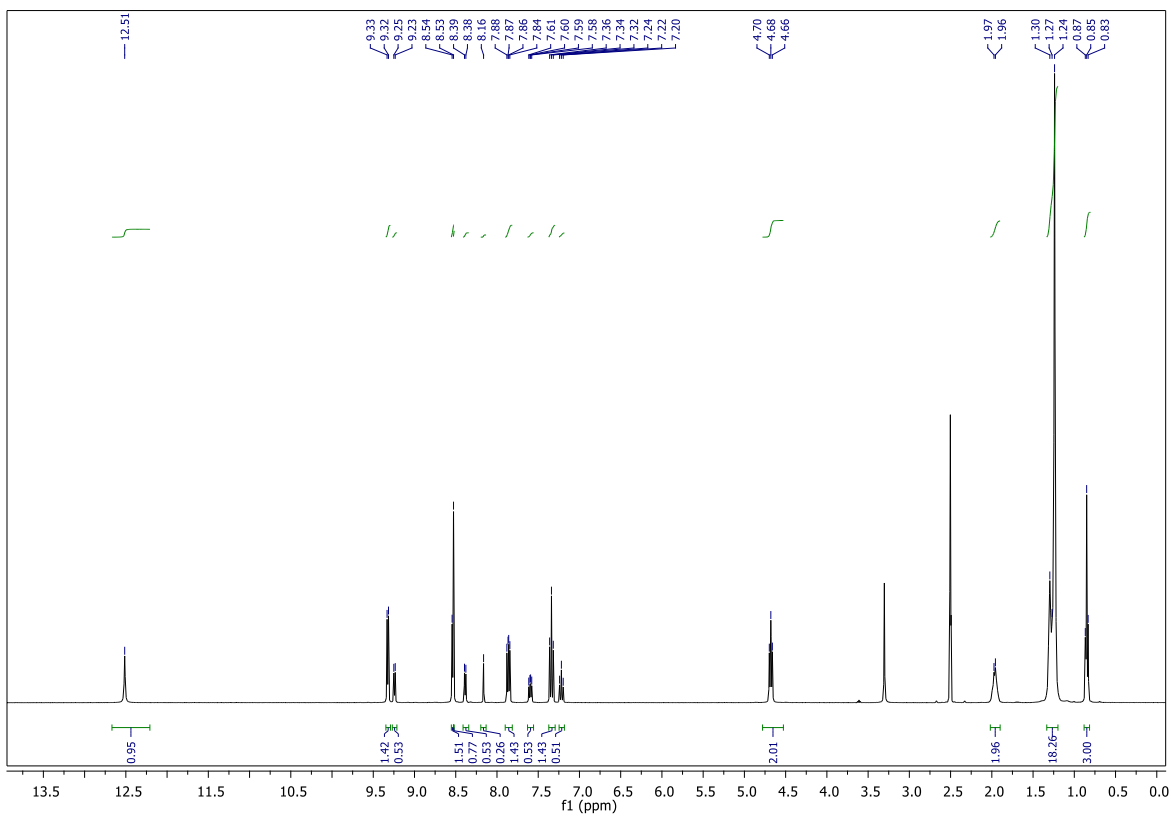

Figure S99. <sup>1</sup>H NMR of Compound 24

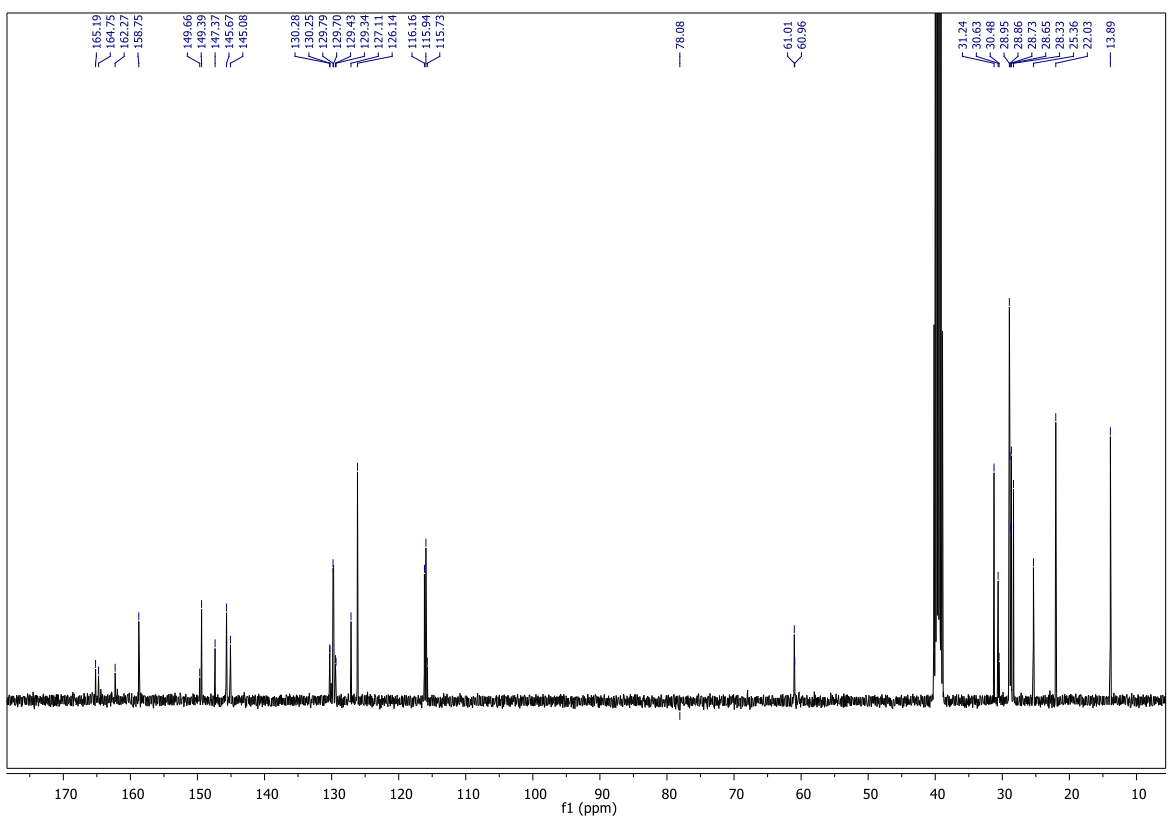

Figure S100. <sup>13</sup>C NMR of Compound 24

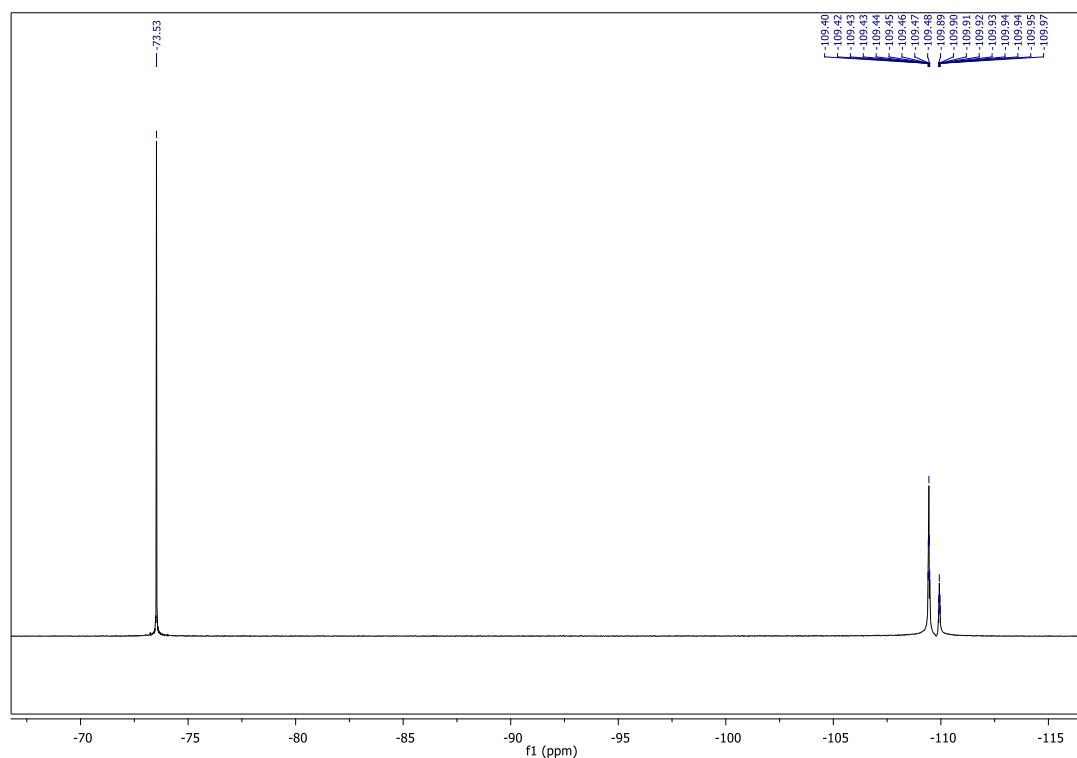

Figure S101.  $^{19}\text{F}$ NMR of Compound 24

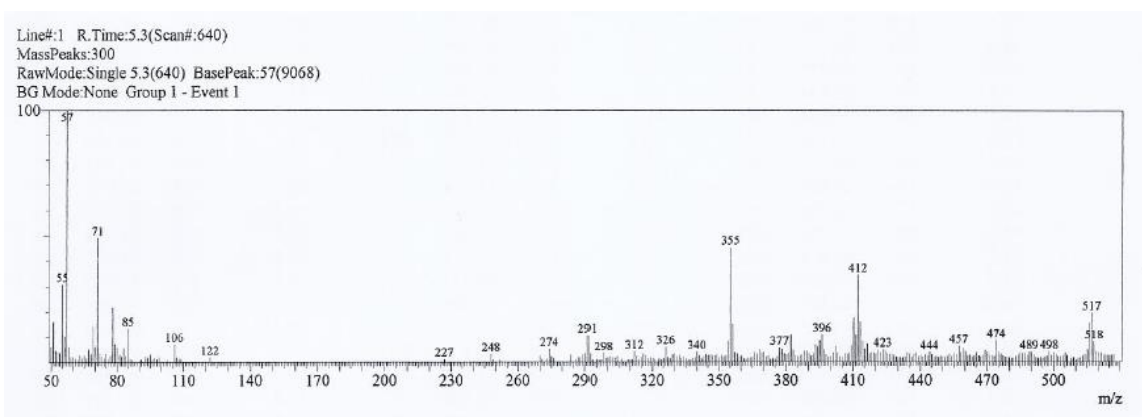

Figure S102. MS (ESI) of Compound 24

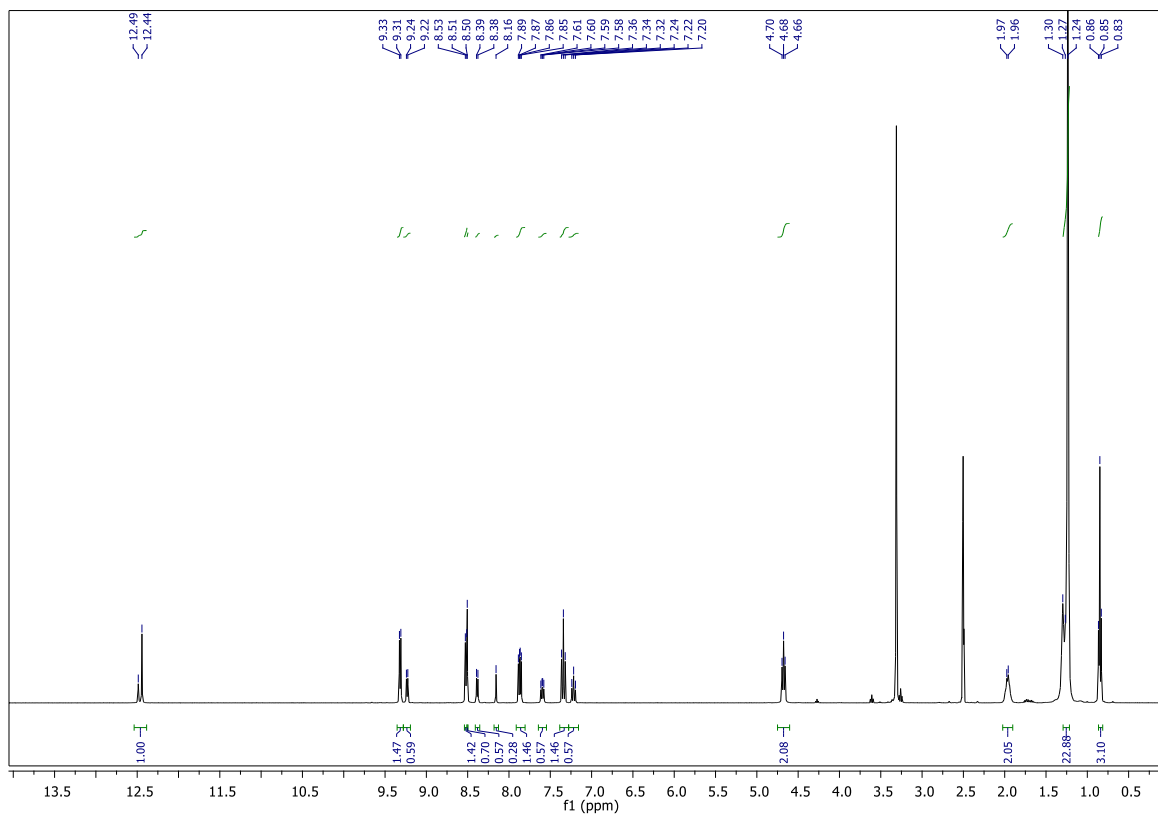

Figure S103. <sup>1</sup>H NMR of Compound 25

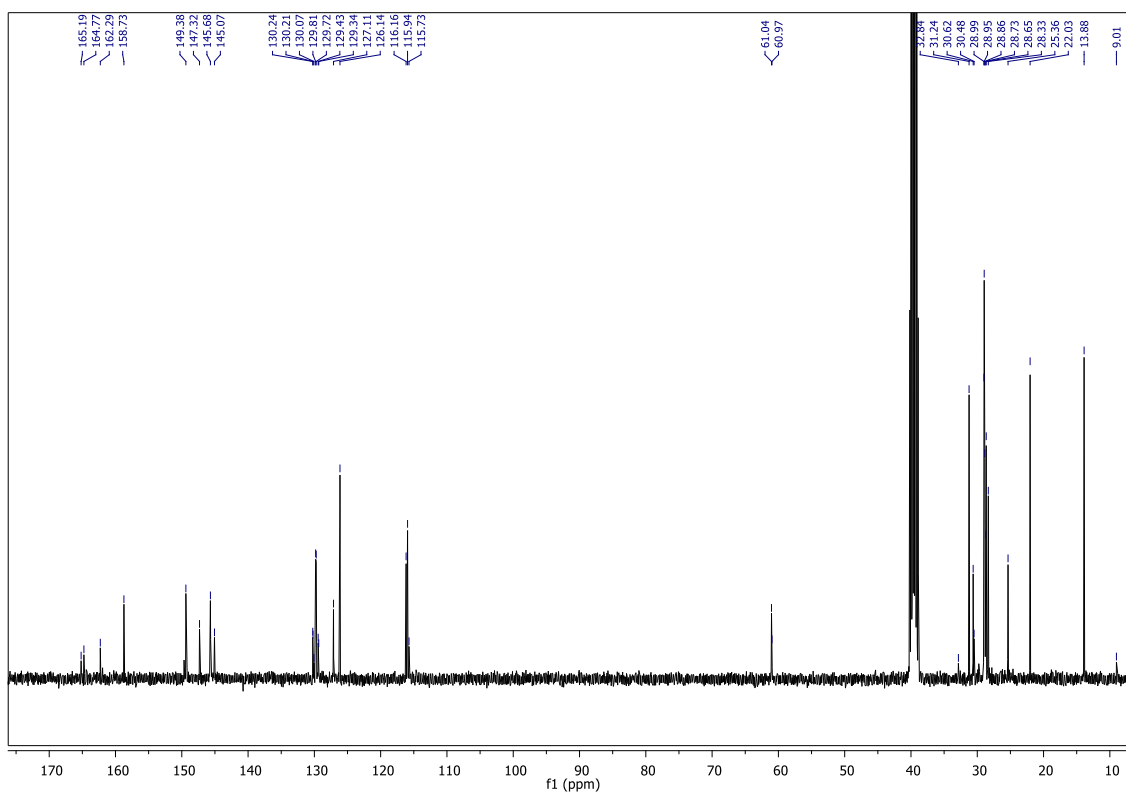

Figure S104. <sup>13</sup>C NMR of Compound 25

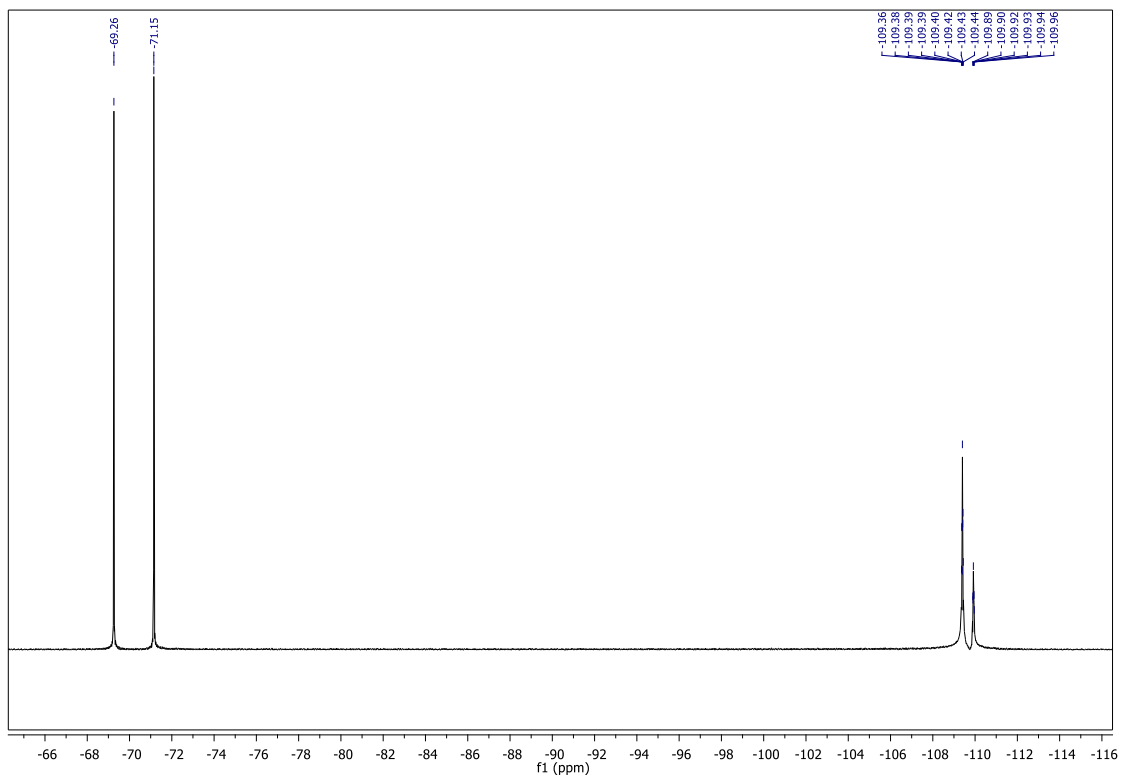

Figure S105.  $^{19}\text{F}$ NMR of Compound 25

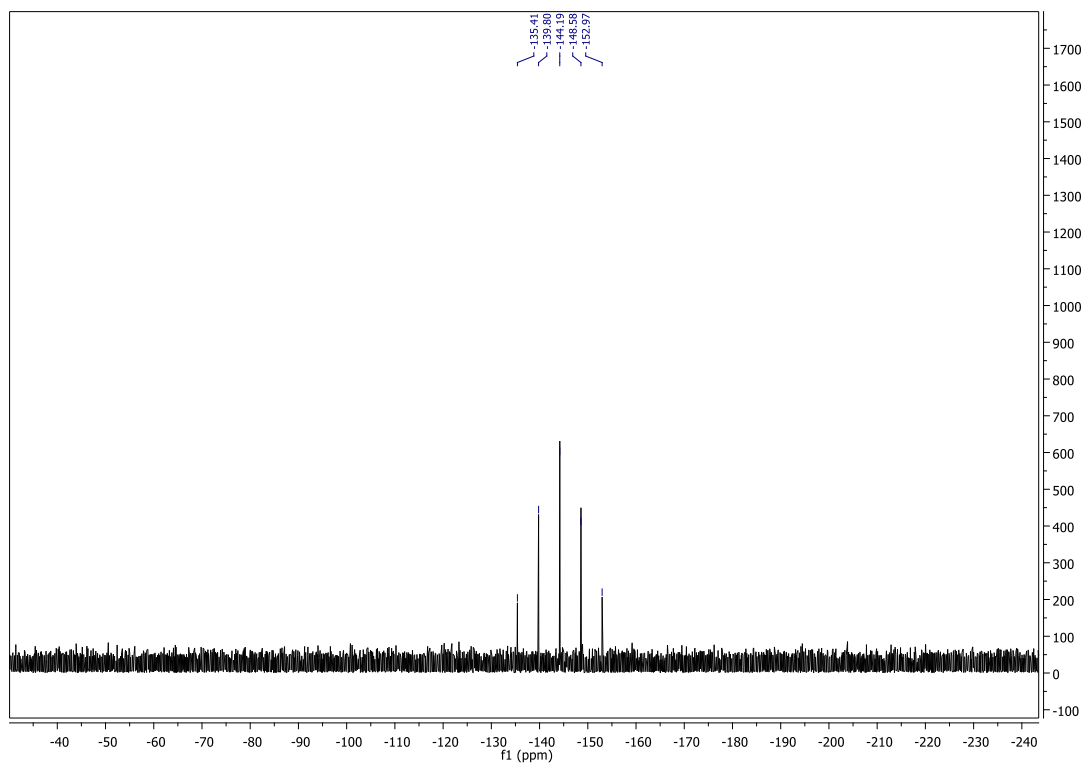

Figure S106.  $^{31}\text{P}$ NMR of Compound 25

Line#:1 R.Time:5.3(Scan#:639)  
MassPeaks:384  
RawMode:Single 5.3(639) BasePeak:57(26740)  
BG Mode:None Group 1 - Event 1

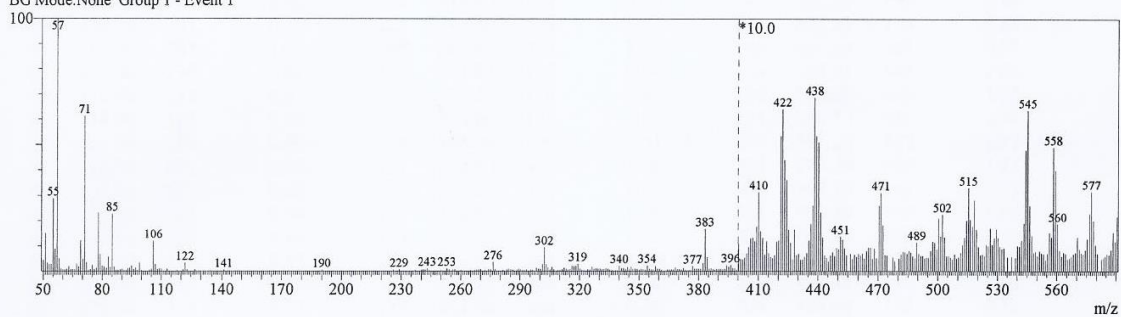

Figure S107. MS (ESI) of Compound 25

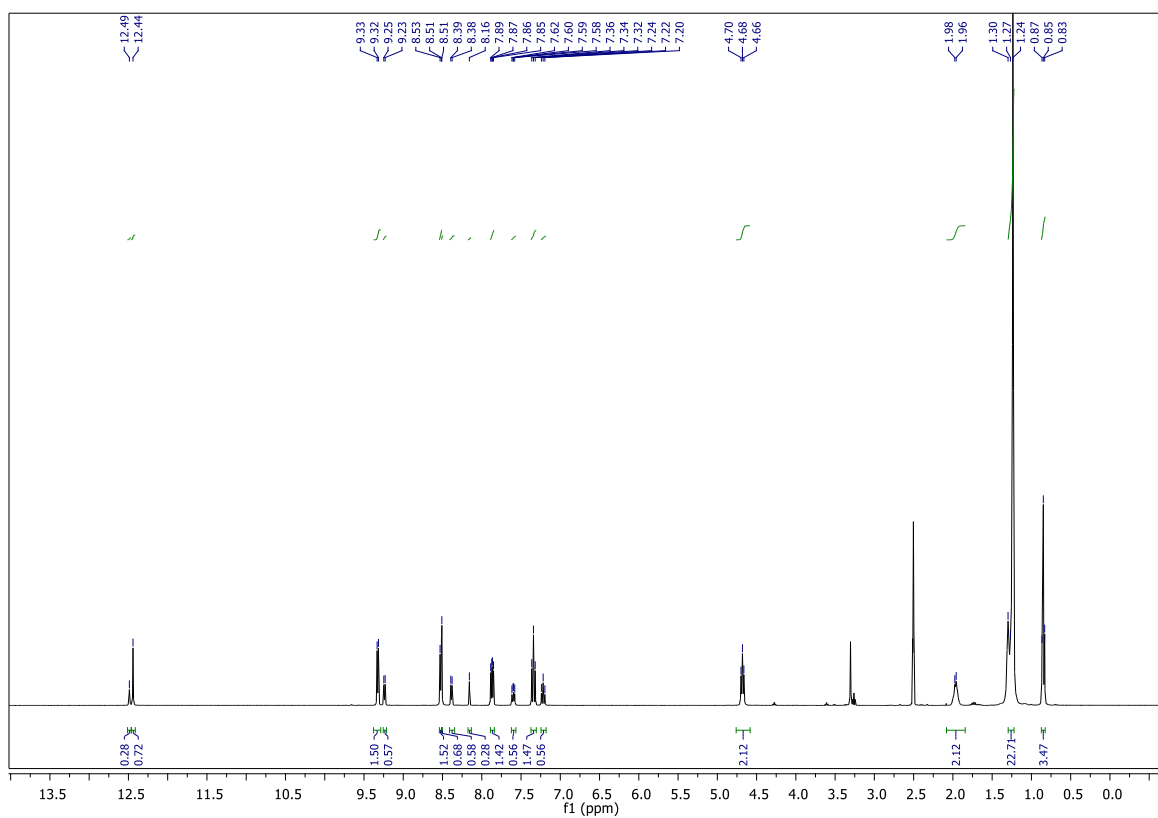

Figure S108. <sup>1</sup>H NMR of Compound 26

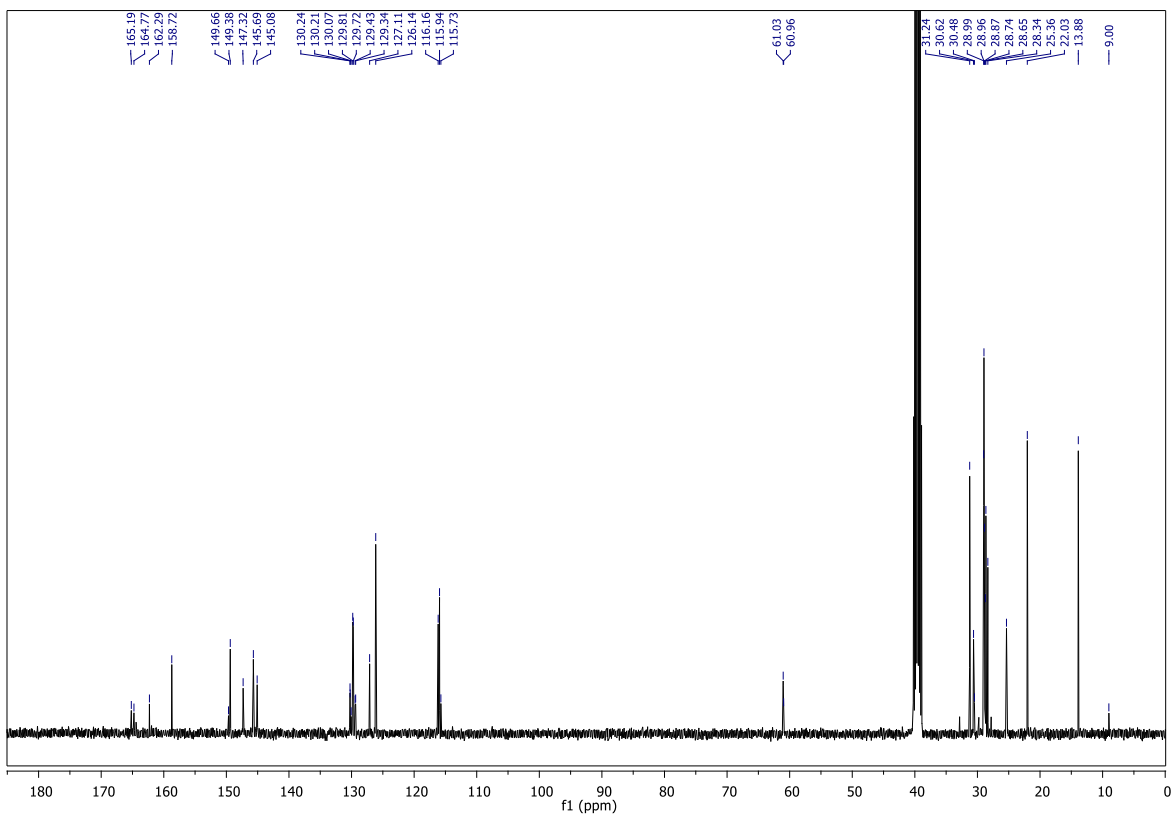

Figure S109. <sup>13</sup>CNMR of Compound 26

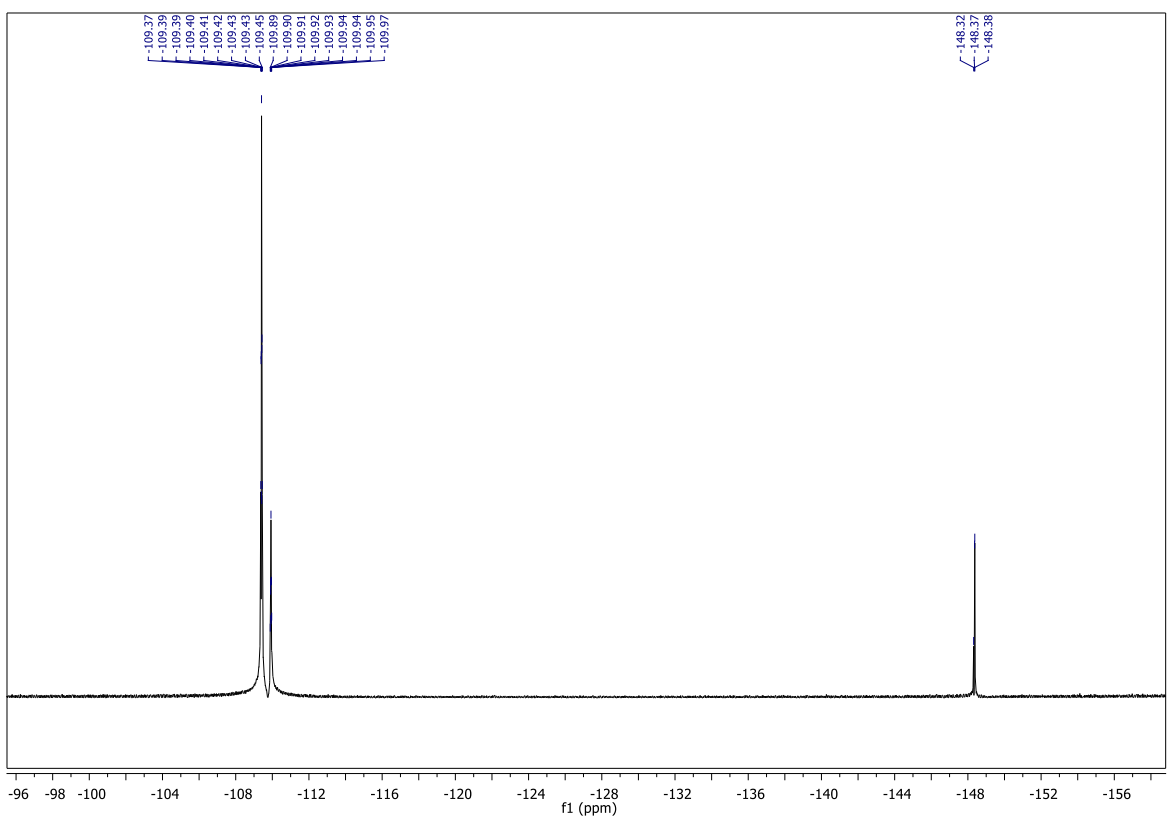

Figure S110. <sup>19</sup>FNMR of Compound 26

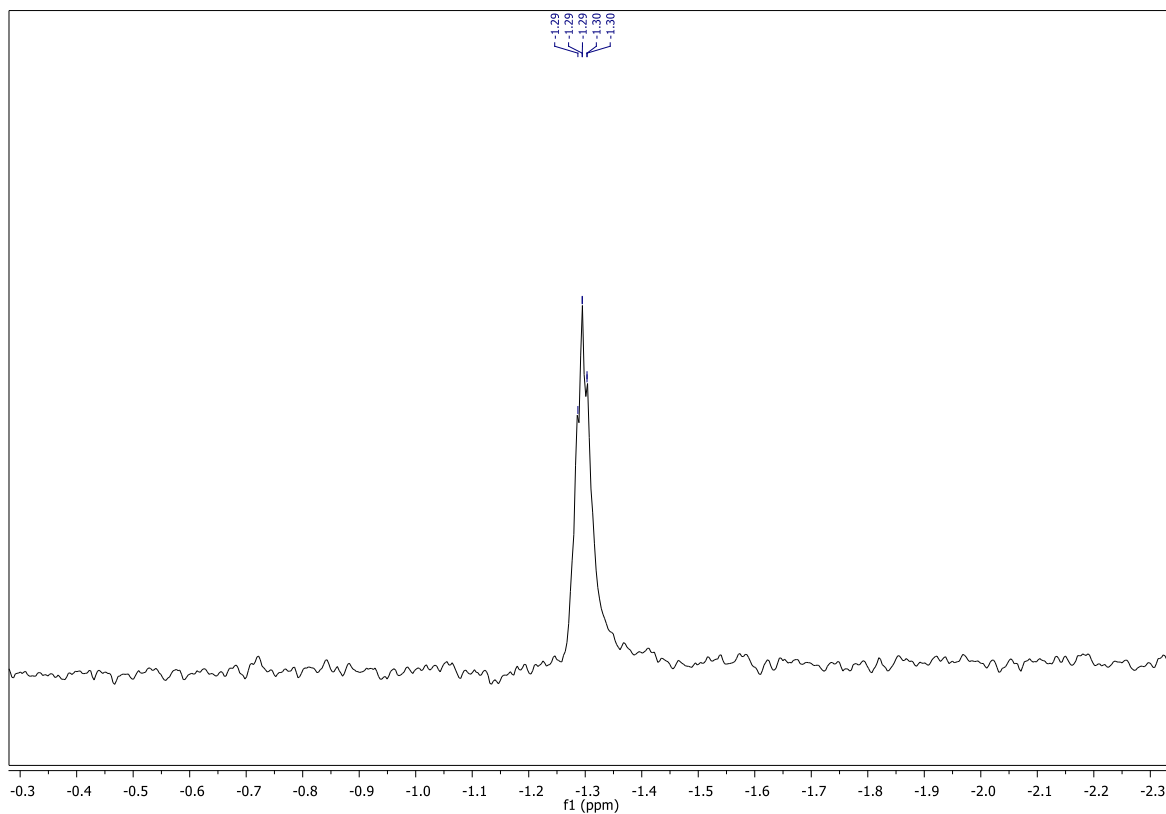

Figure S111.  $^{11}\text{B}$ NMR of Compound 26

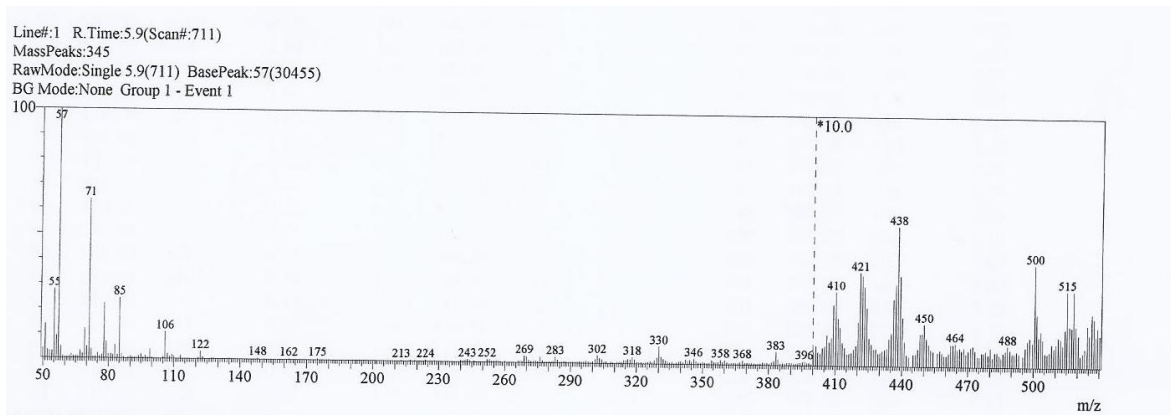

Figure S112. MS (ESI) of Compound 26



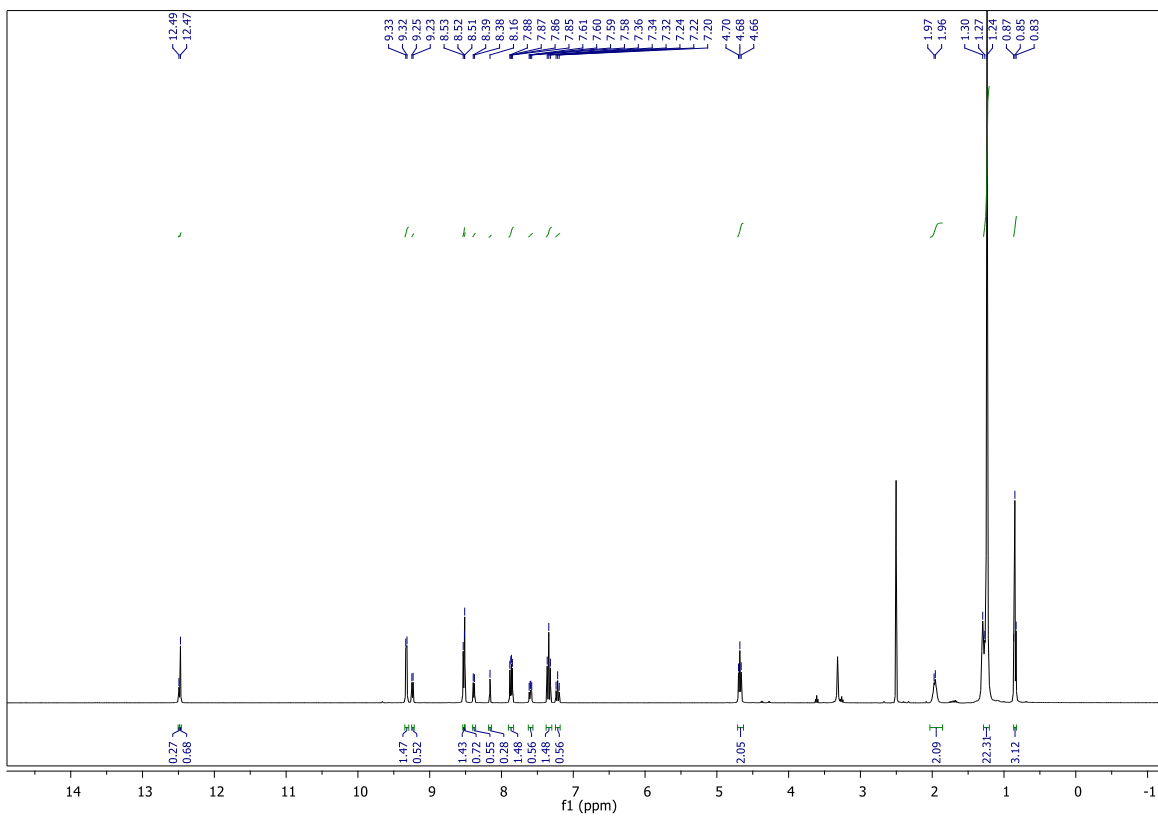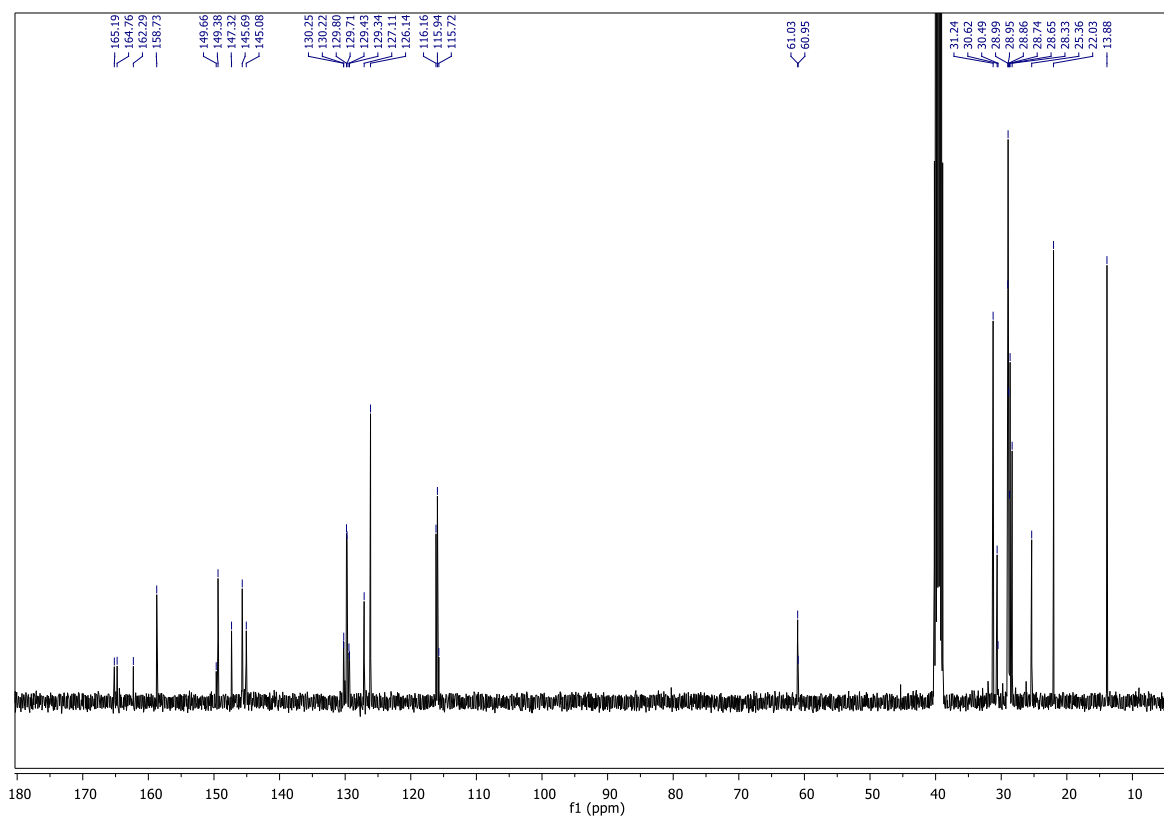

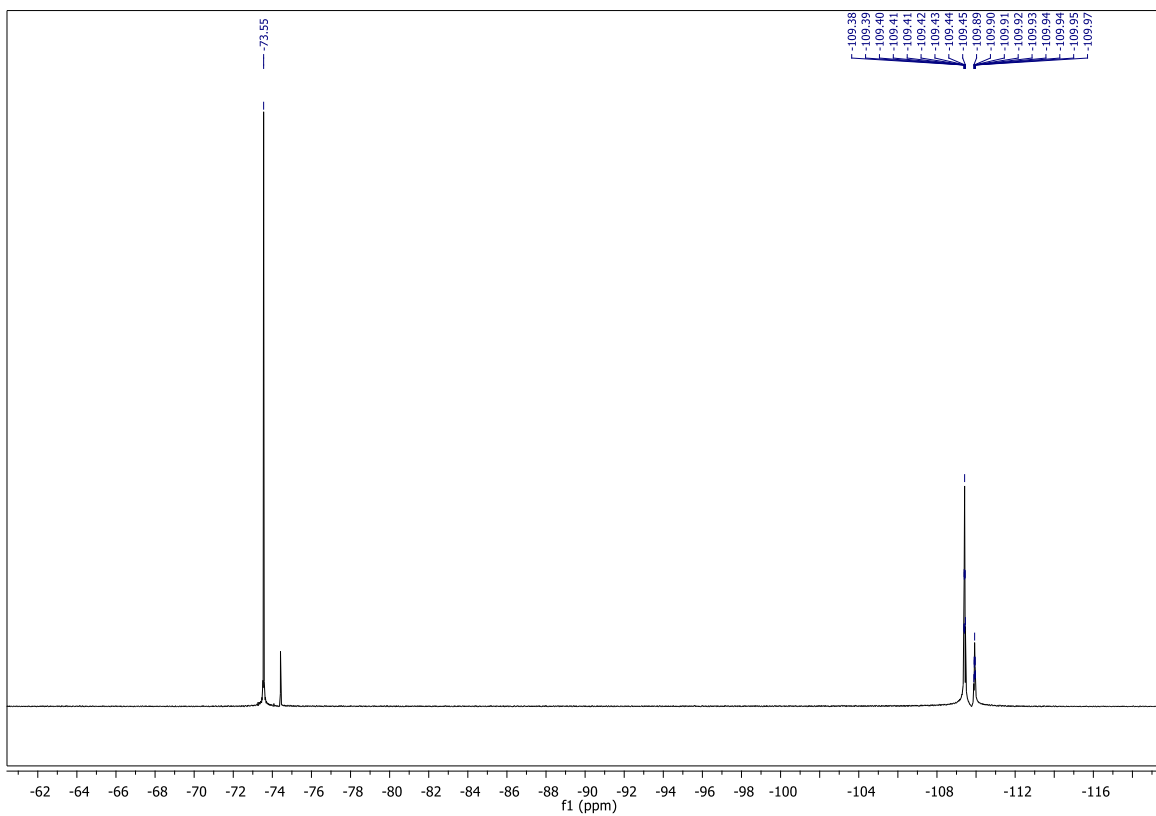

Figure S115.  $^{19}\text{F}$ NMR of Compound 27

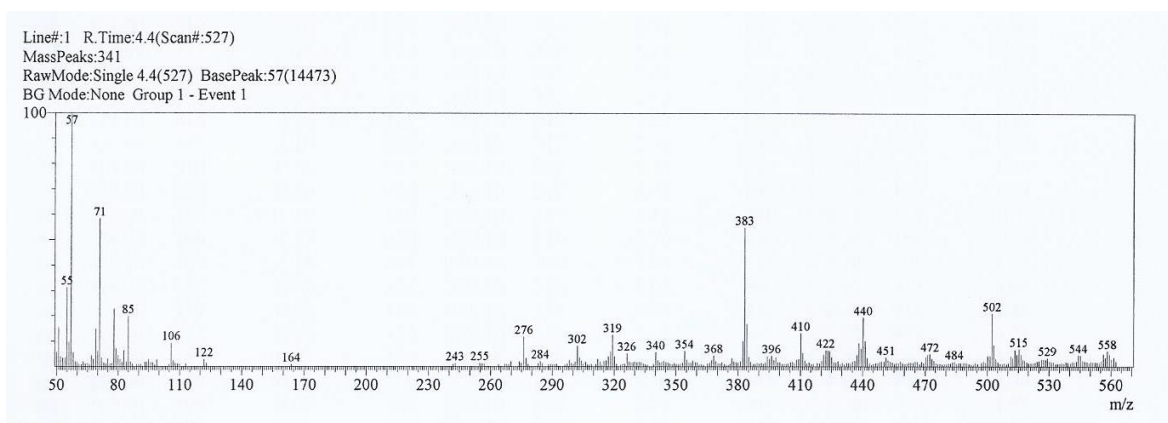

Figure S116. MS (ESI) of Compound 27

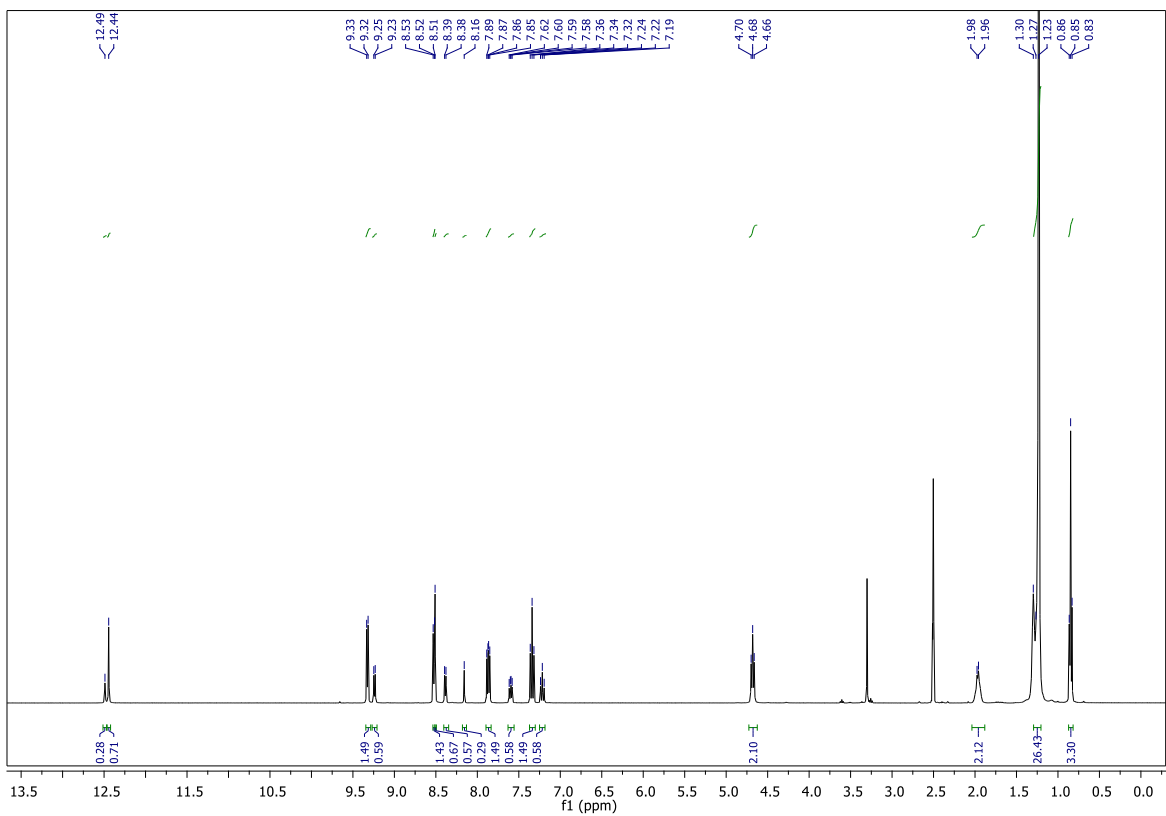

Figure S117.  $^1\text{H}$ NMR of Compound 28

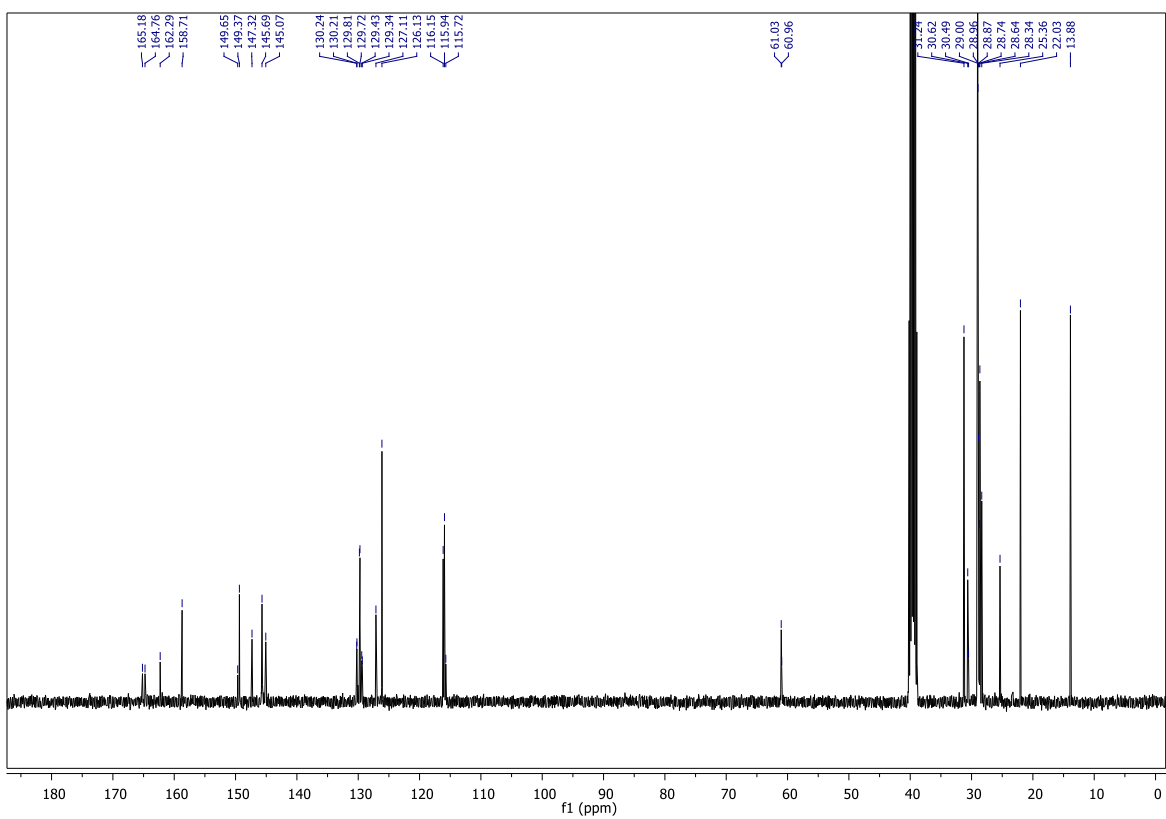

Figure S118.  $^{13}\text{C}$ NMR of Compound 28

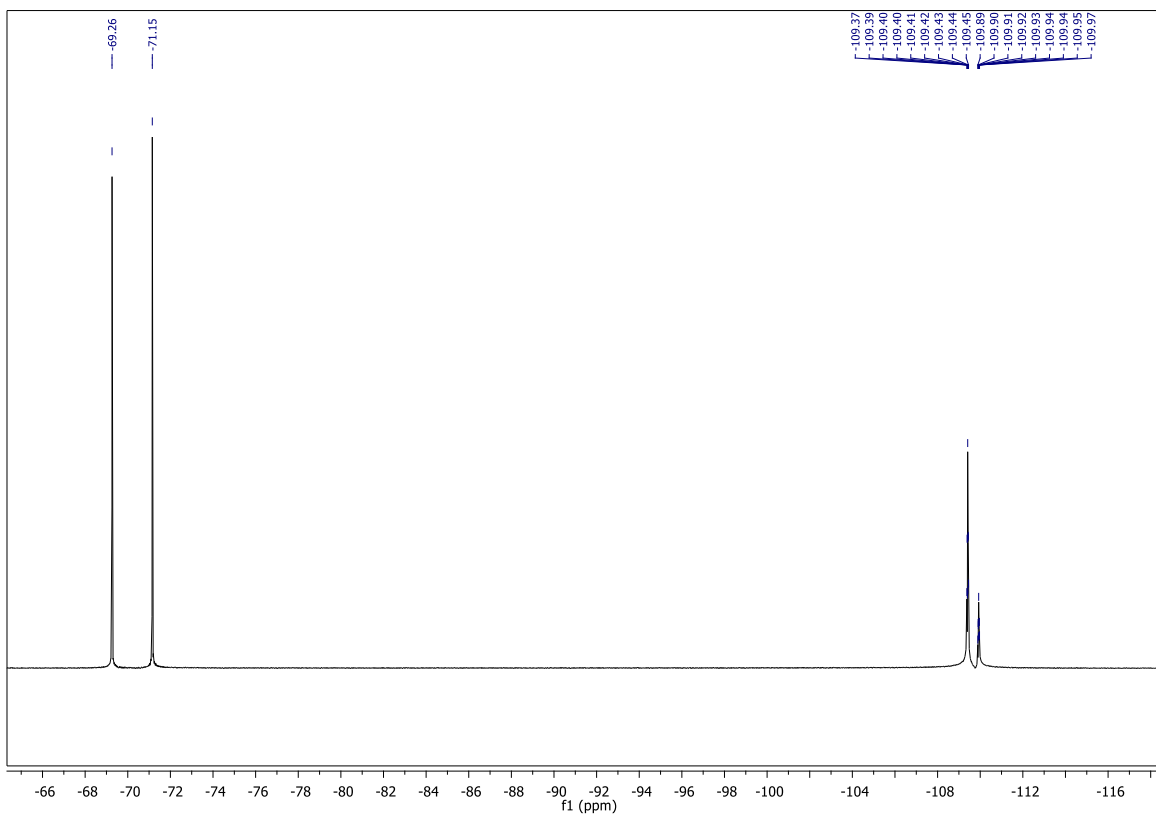

Figure S119.  $^{19}\text{F}$ NMR of Compound 28

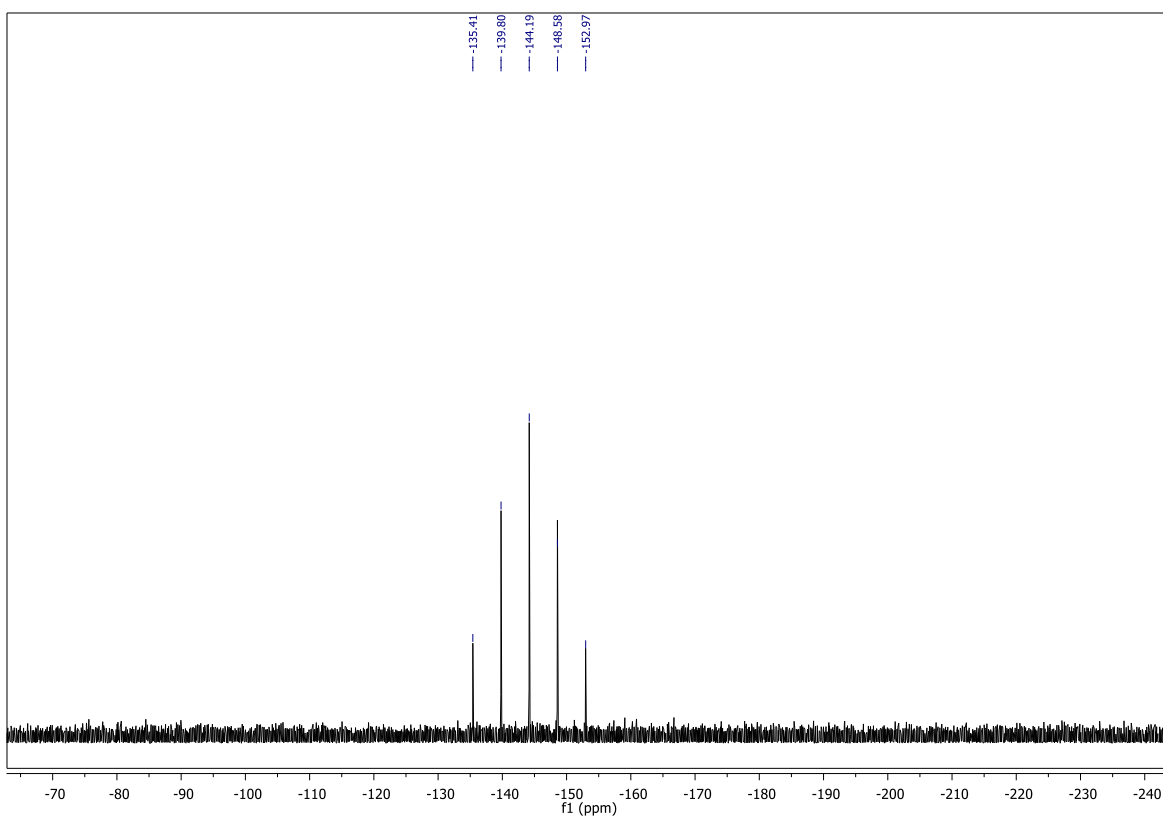

Figure S120.  $^{31}\text{P}$ NMR of Compound 28

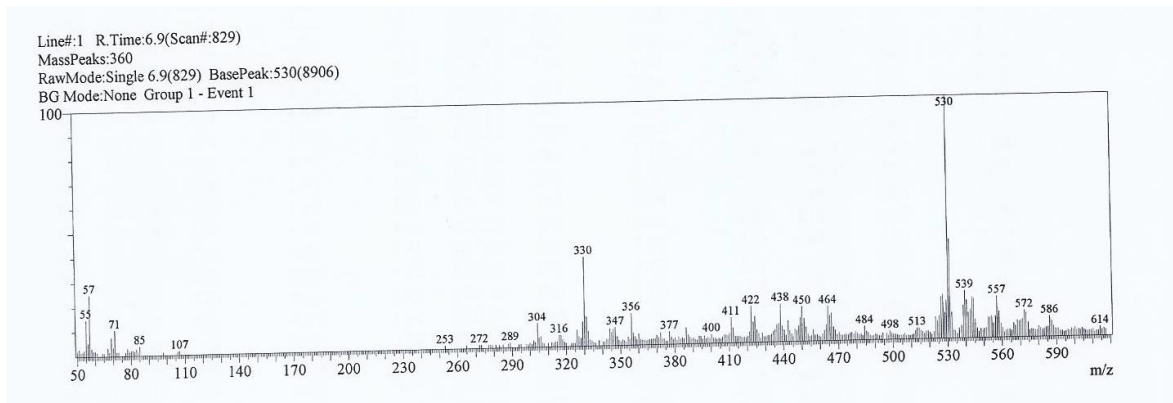

Figure S121. MS (ESI) of Compound 28

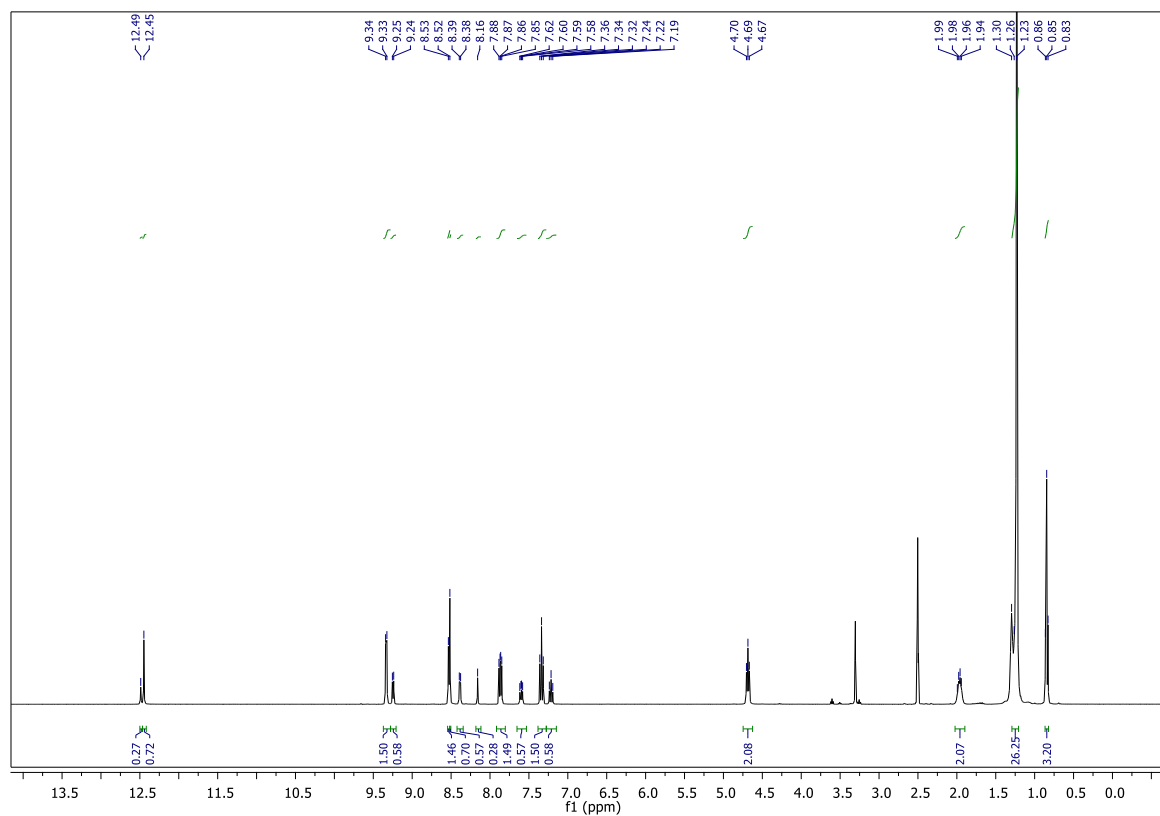

Figure S122. <sup>1</sup>H NMR of Compound 29

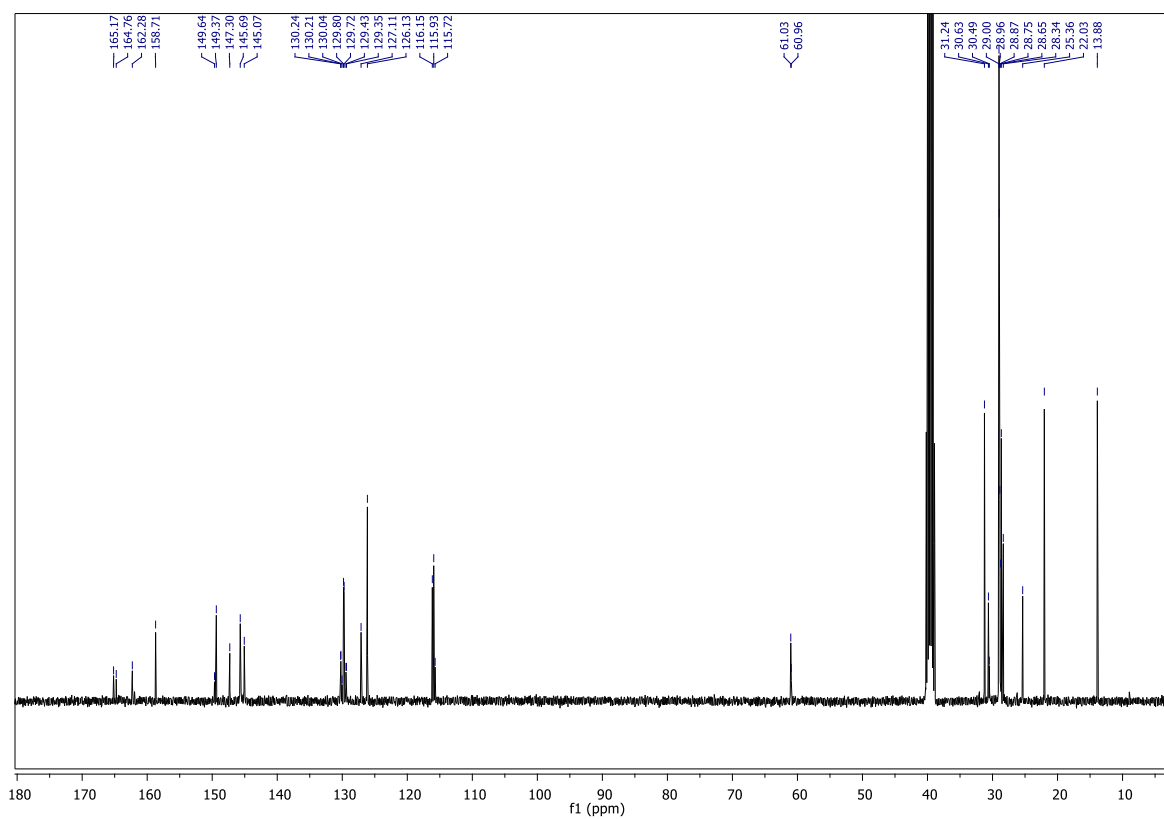

Figure S123. <sup>13</sup>CNMR of Compound 29

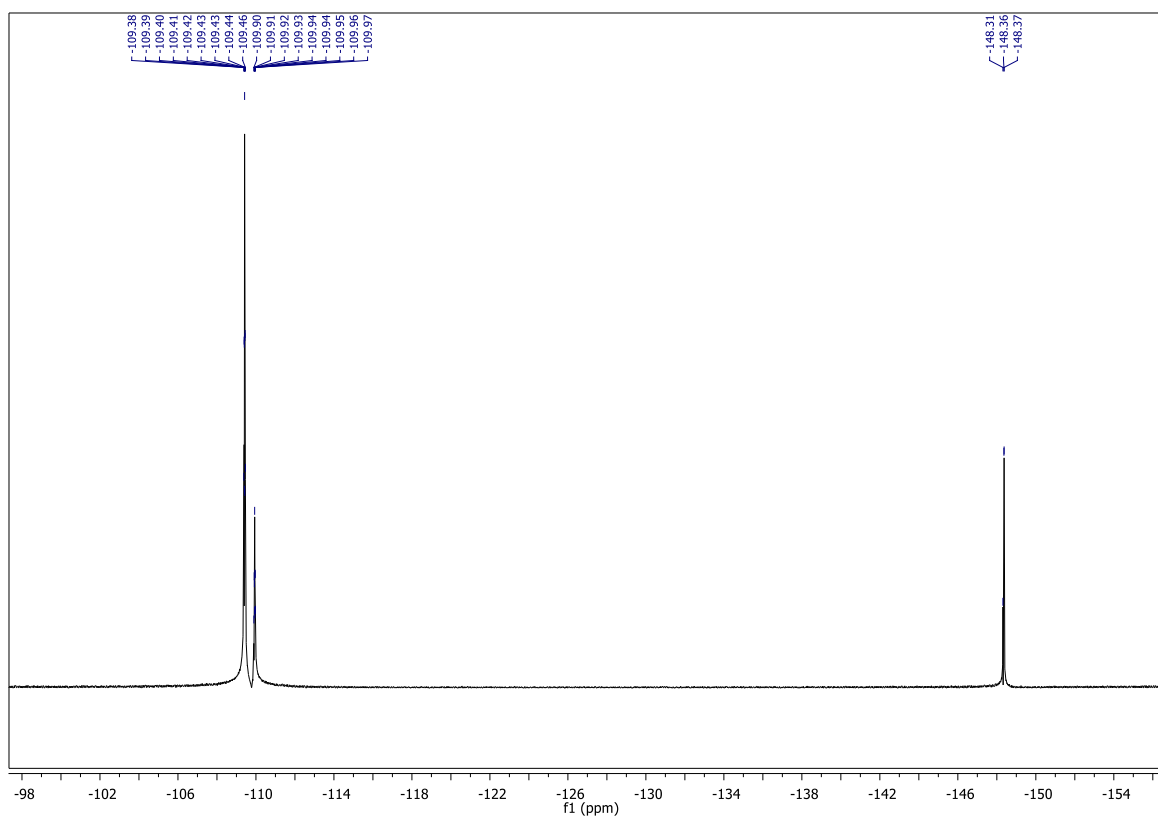

Figure S124. <sup>19</sup>FNMR of Compound 29

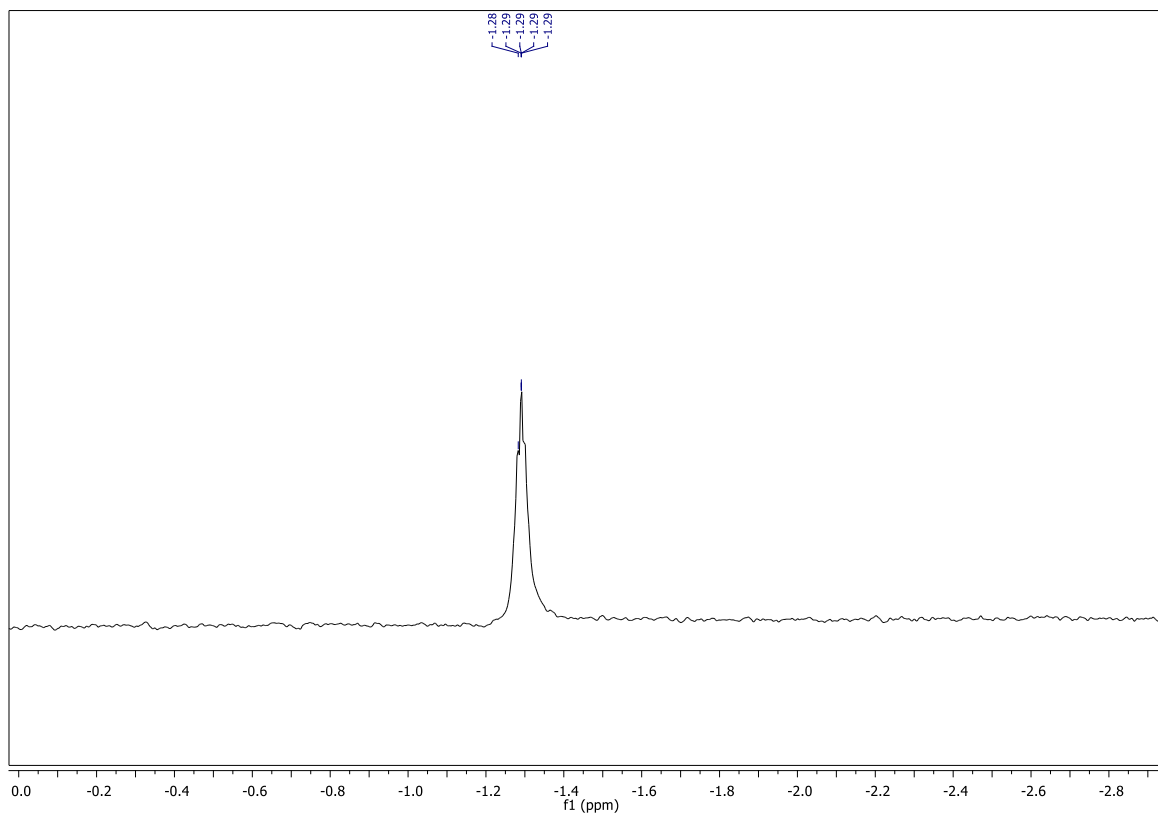

Figure S125.  $^{11}\text{B}$ NMR of Compound 29

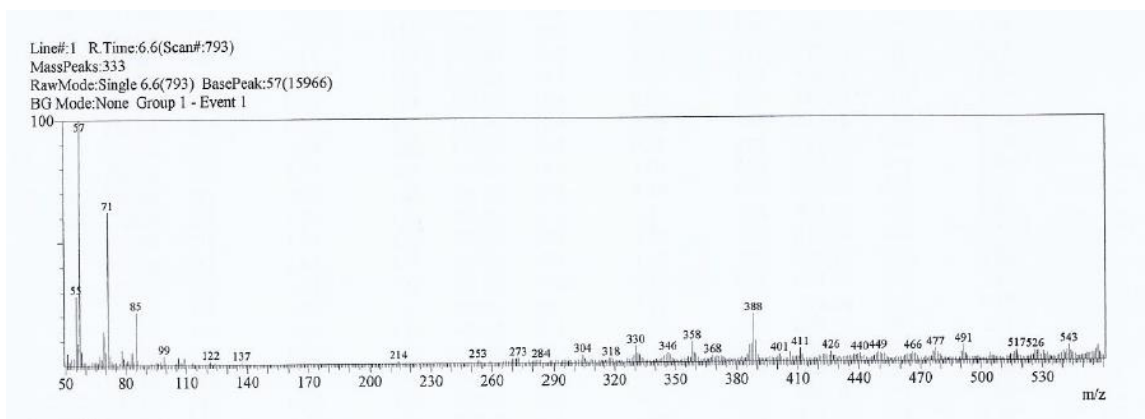

Figure S126. MS (ESI) of Compound 29

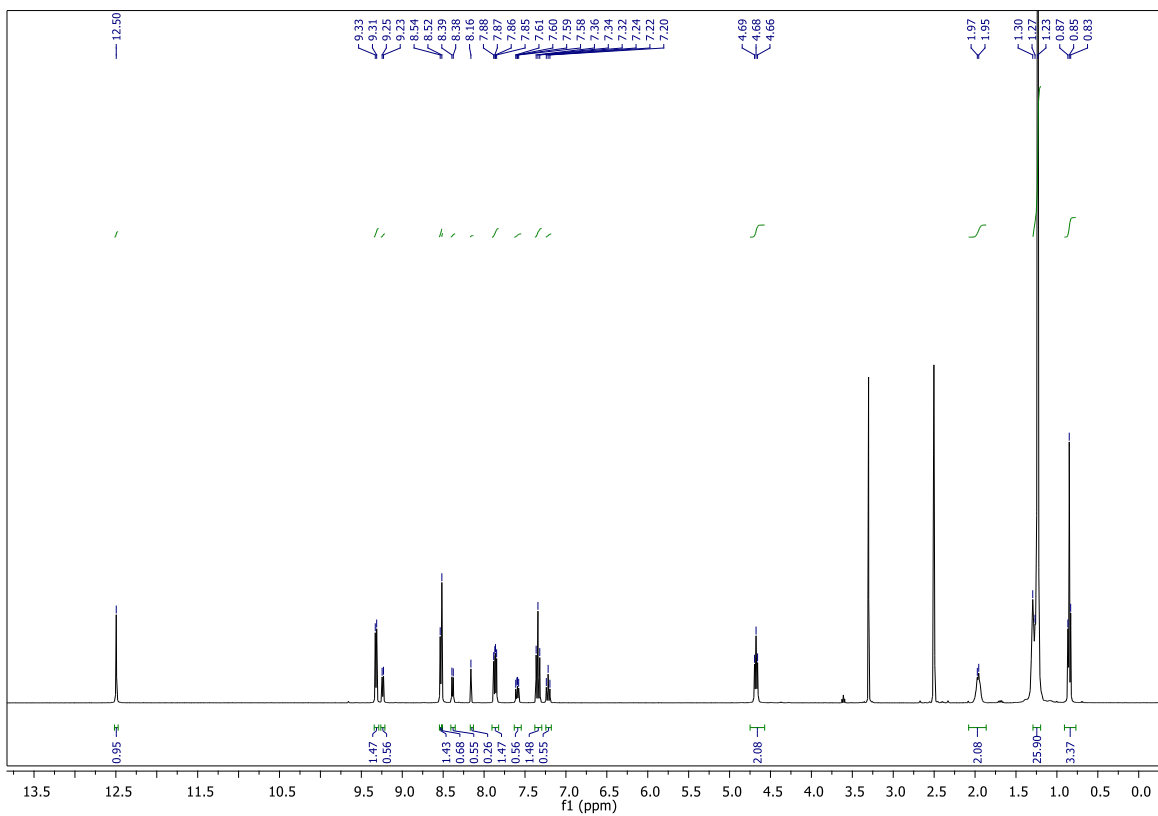

Figure S127. <sup>1</sup>H NMR of Compound 30

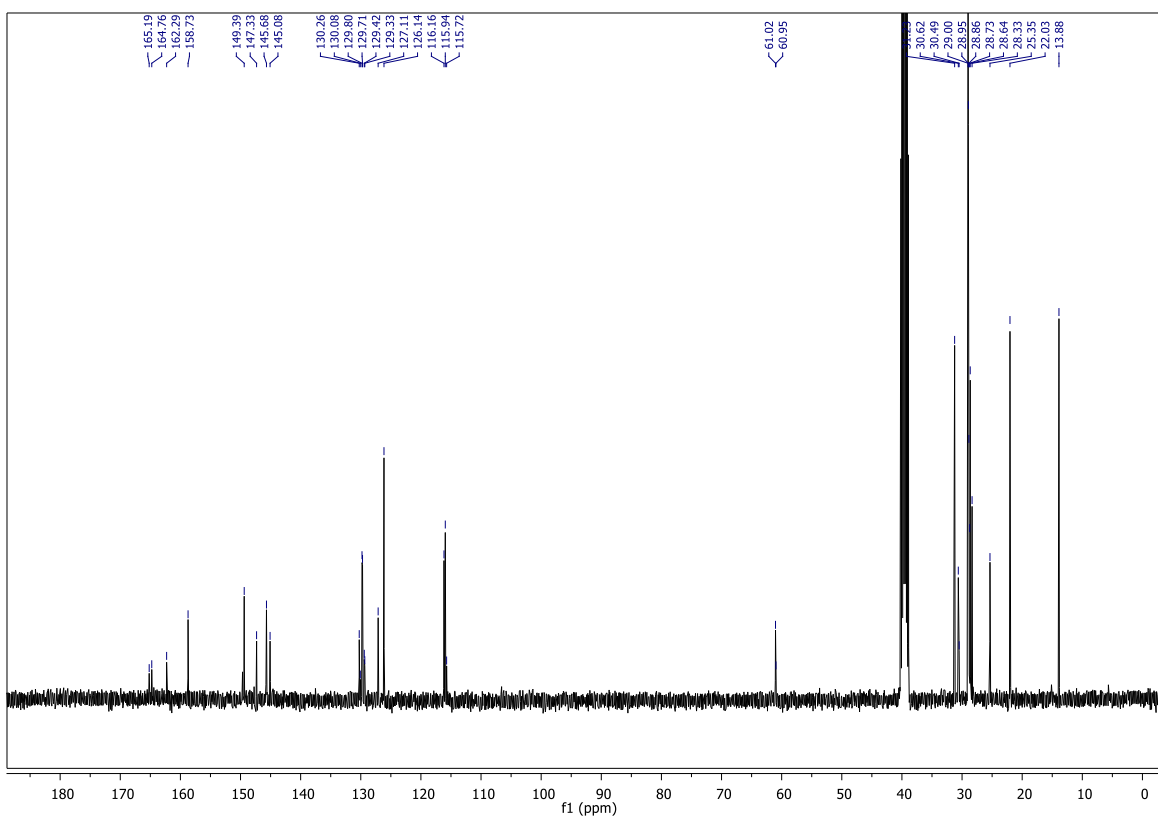

Figure S128. <sup>13</sup>C NMR of Compound 30



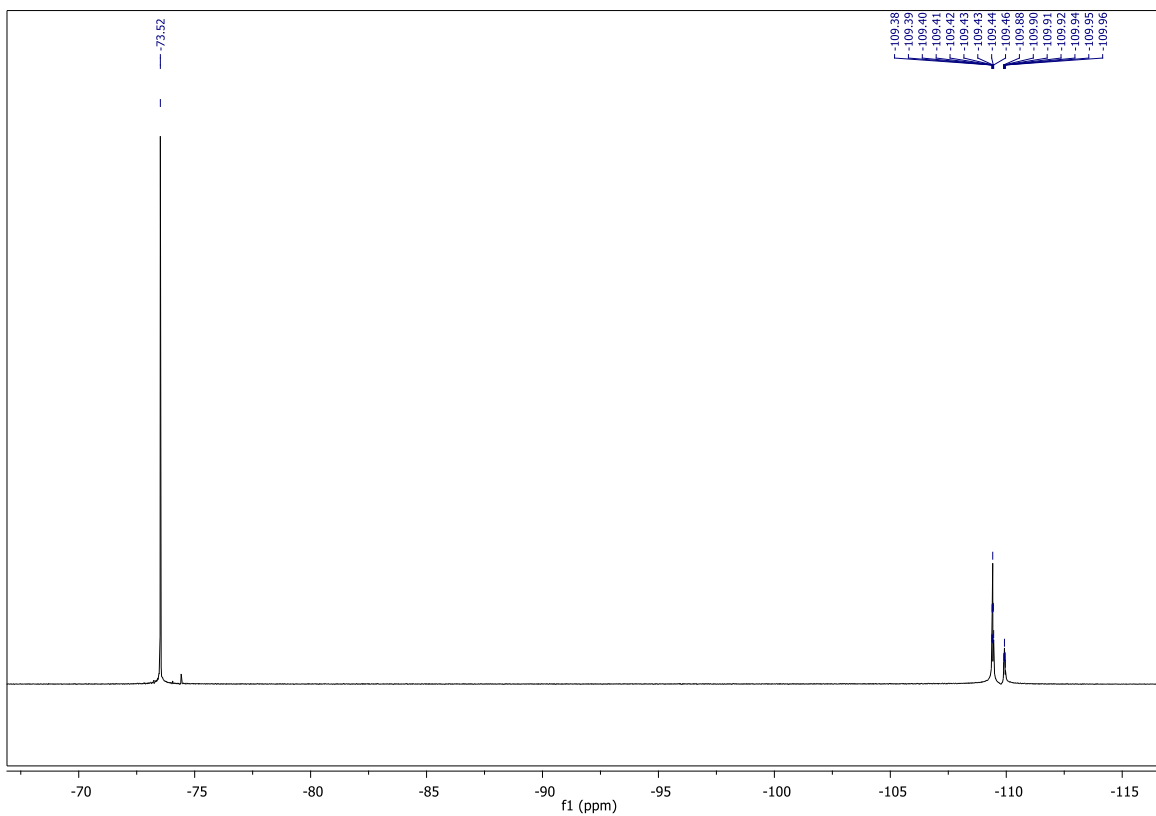

Figure S129.  $^{19}\text{F}$ NMR of Compound 30

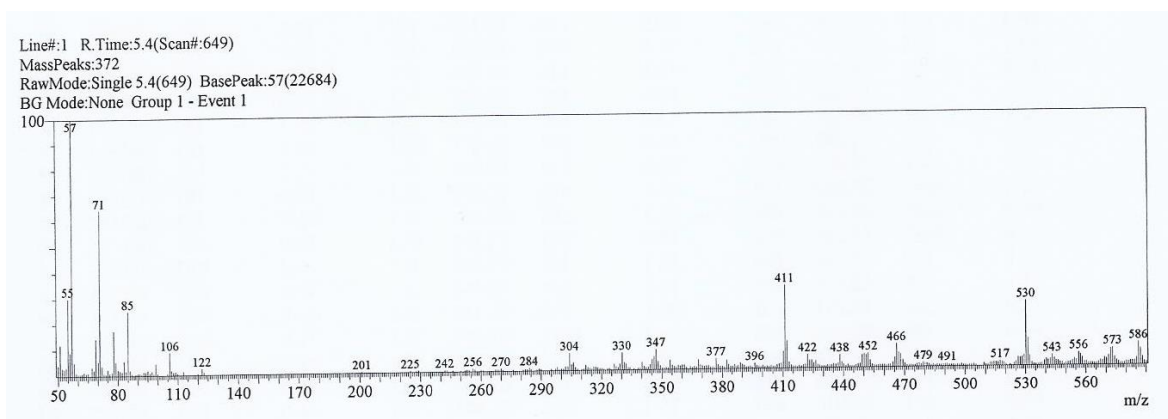

Figure S130. MS (ESI) of Compound 30

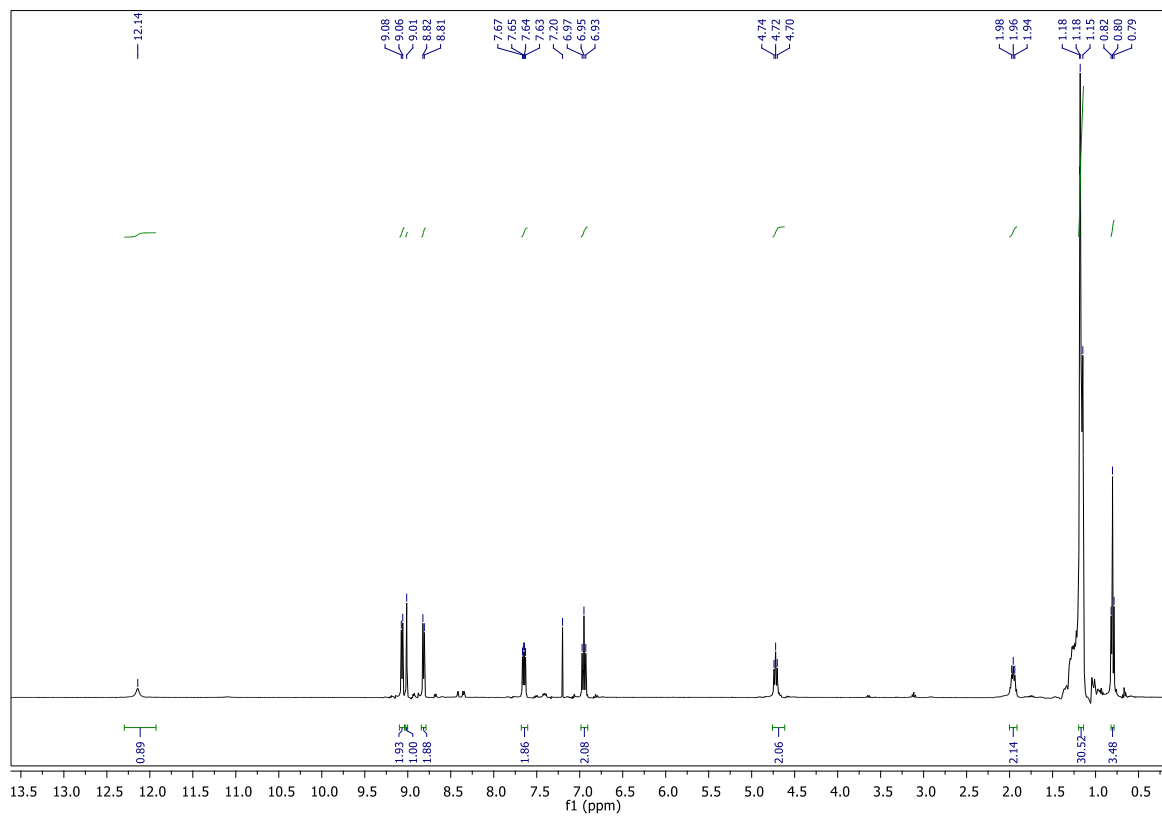

Figure S131. <sup>1</sup>H NMR of Compound 31

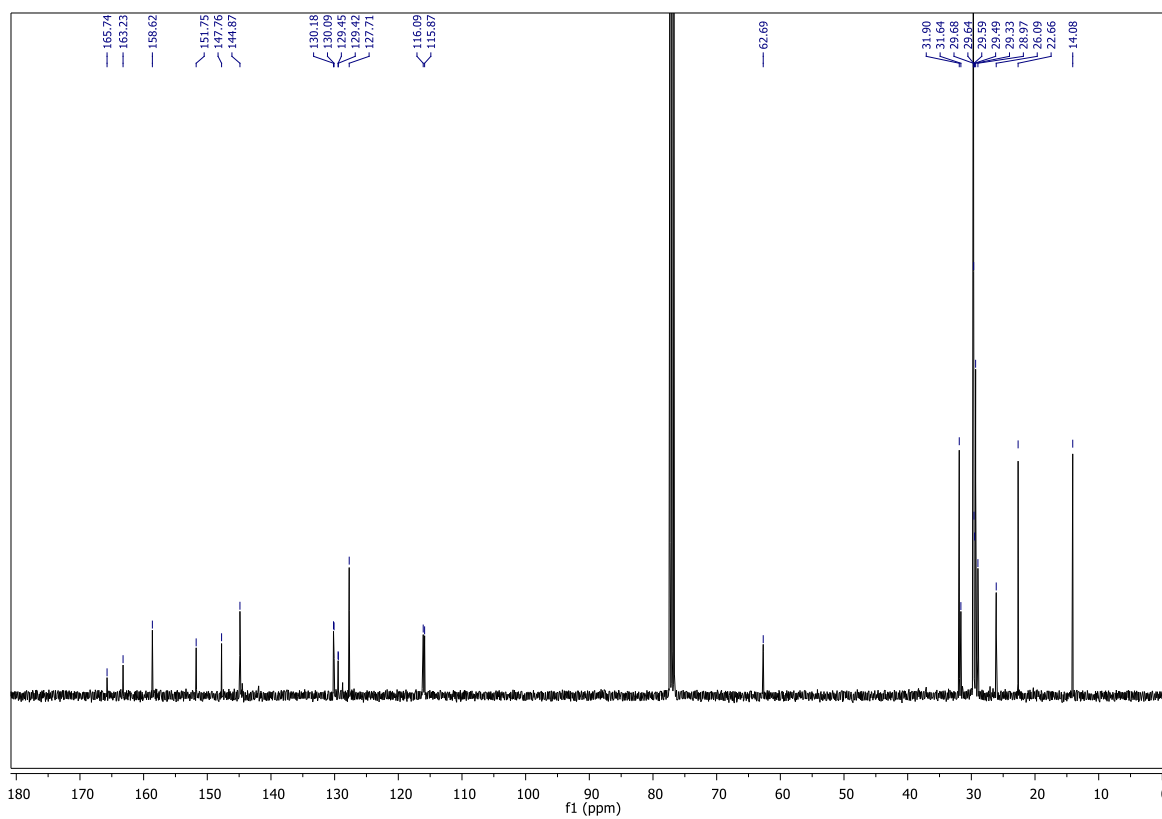

Figure S132. <sup>13</sup>C NMR of Compound 31

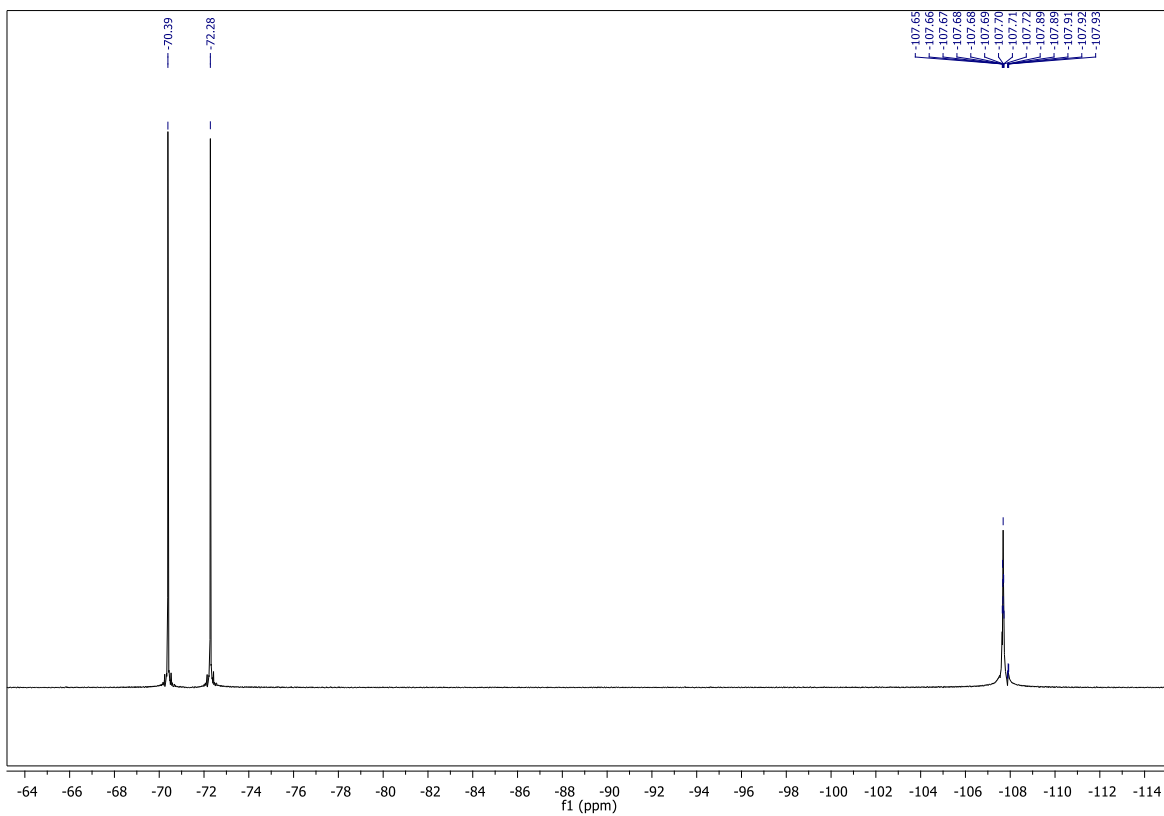

Figure S133.  $^{19}\text{F}$ NMR of Compound 31

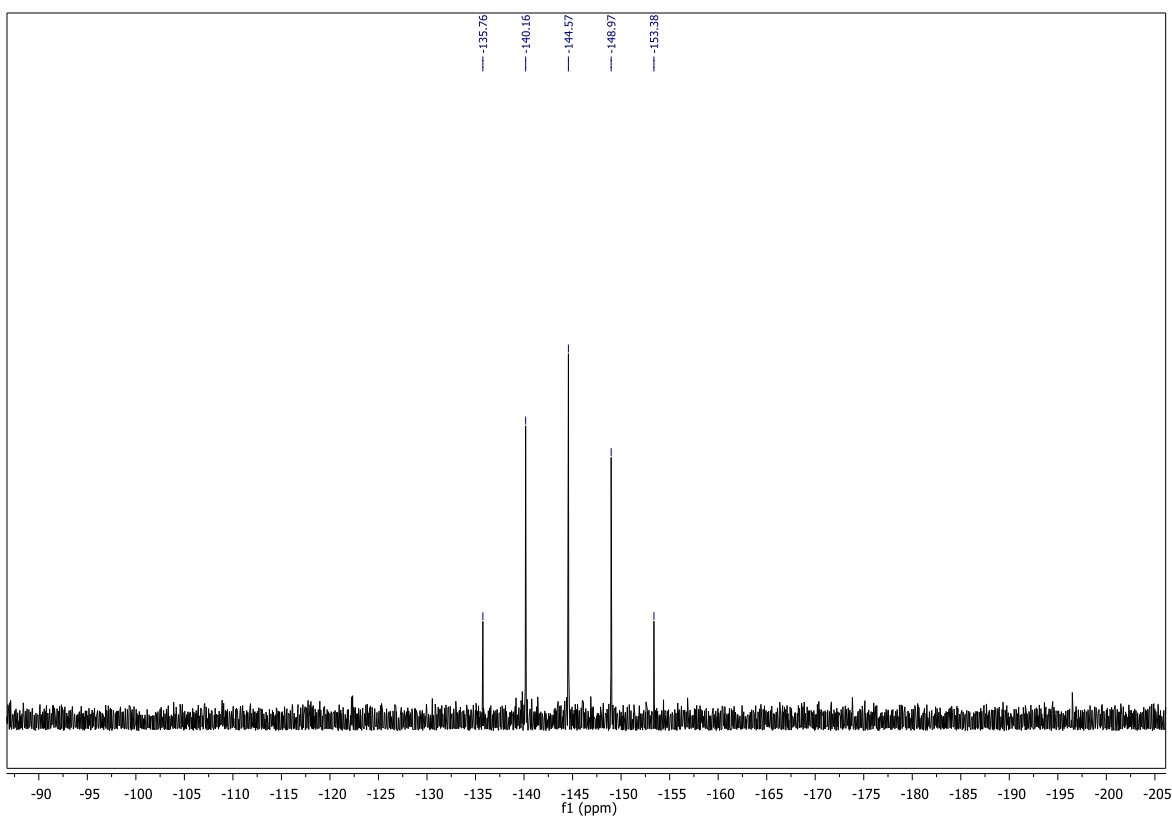

Figure S134.  $^{31}\text{P}$ NMR of Compound 31

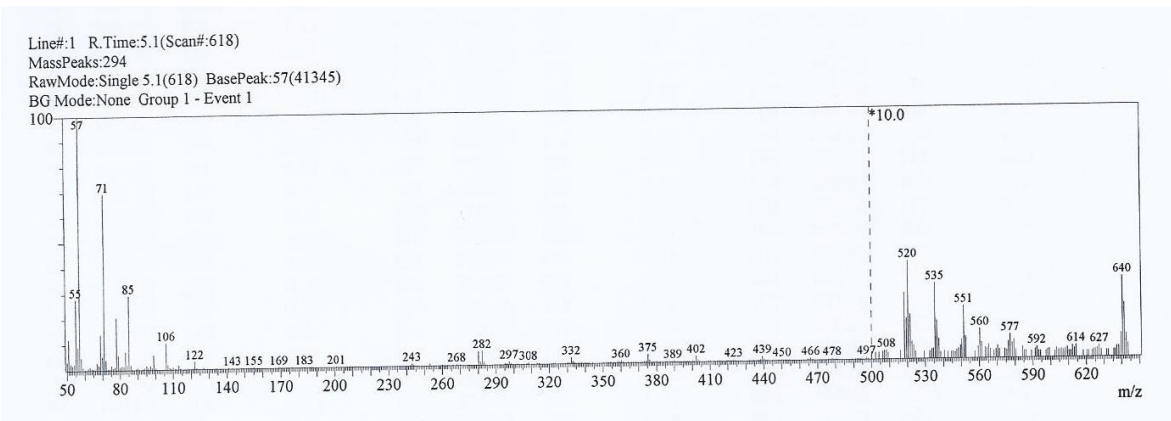

Figure S135. MS (ESI) of Compound 31

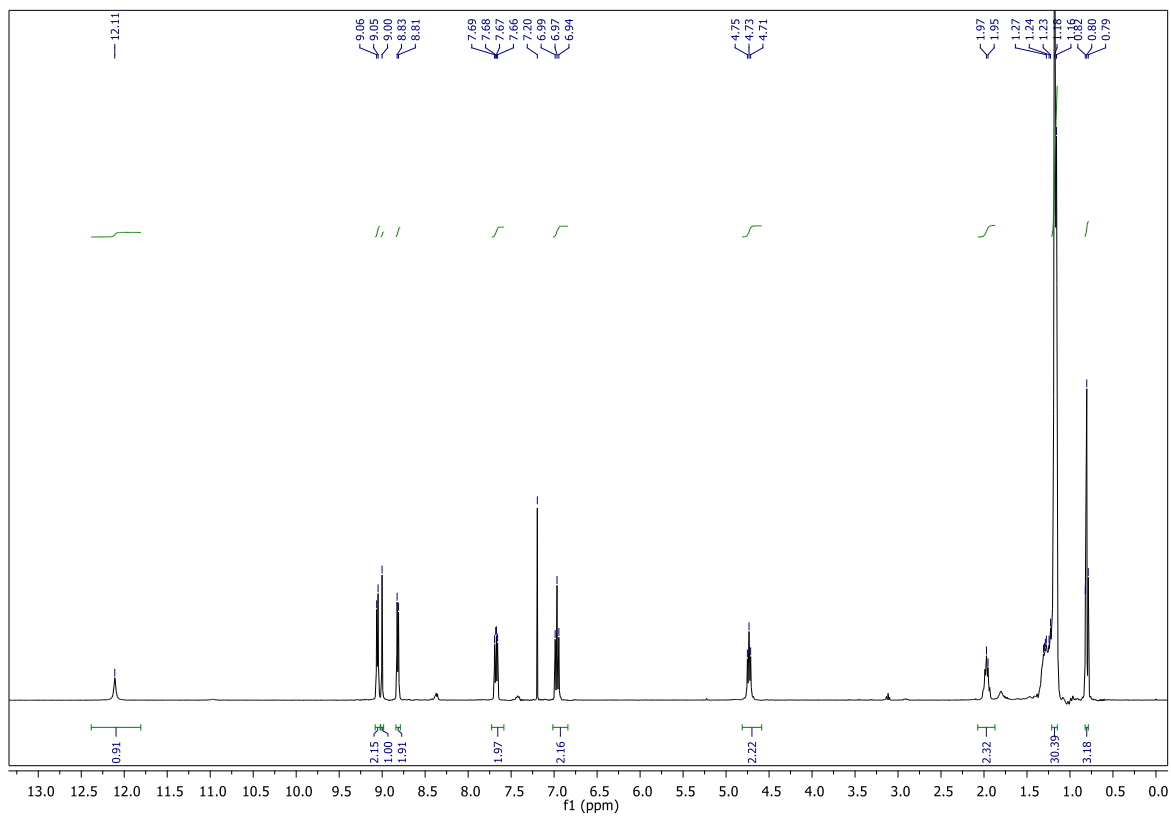

Figure S136. <sup>1</sup>H NMR of Compound 32

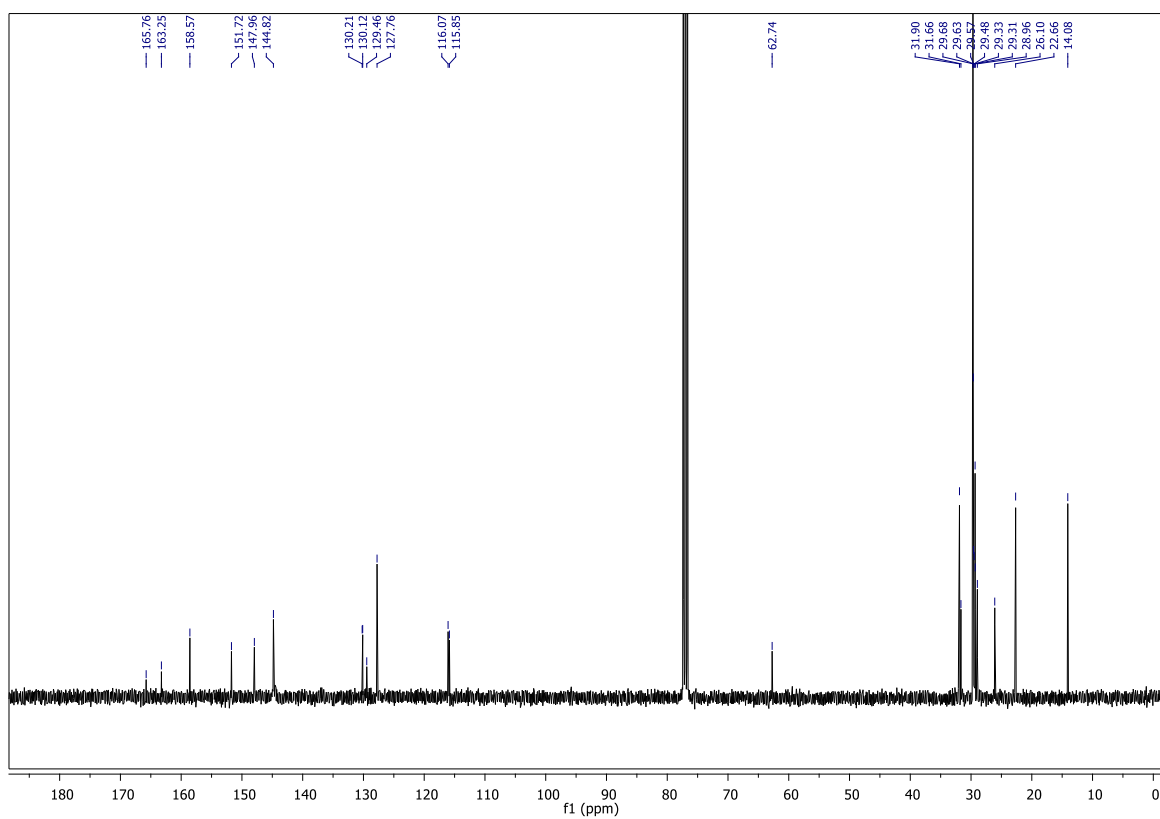

Figure S137. <sup>13</sup>CNMR of Compound 32

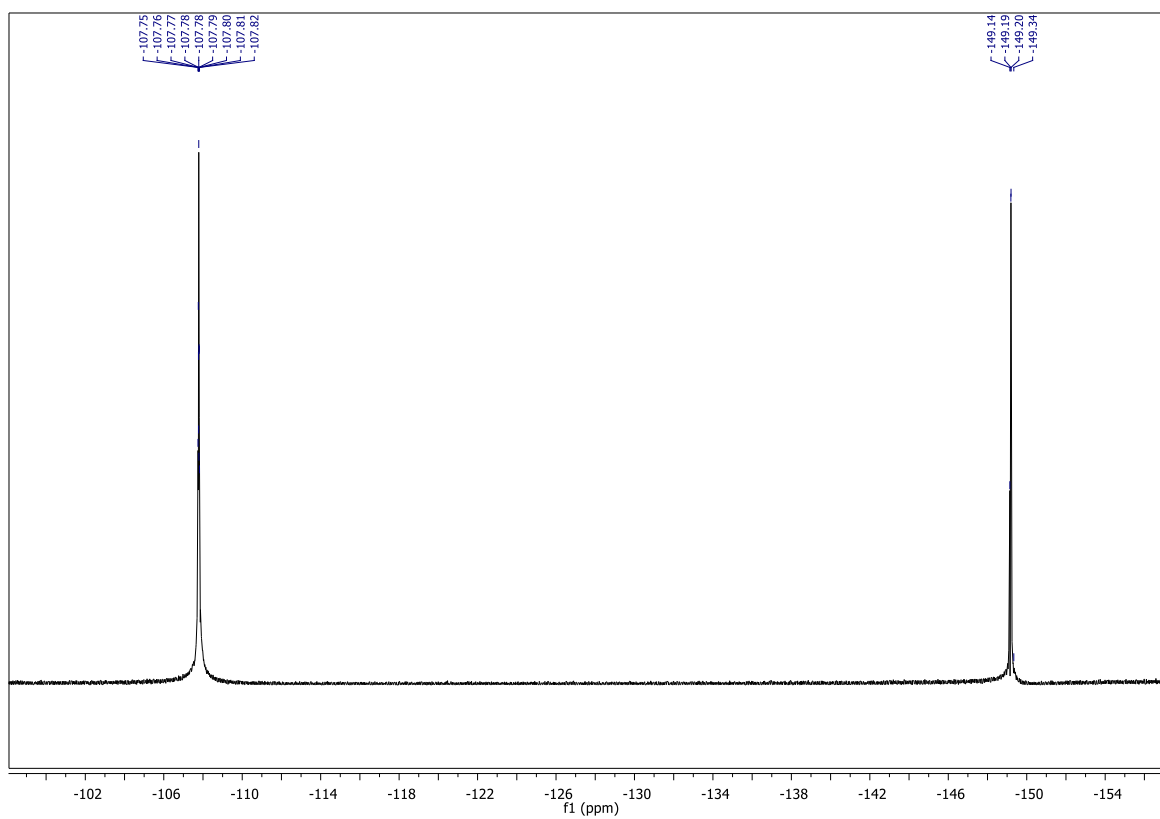

Figure S138. <sup>19</sup>FNMR of Compound 32

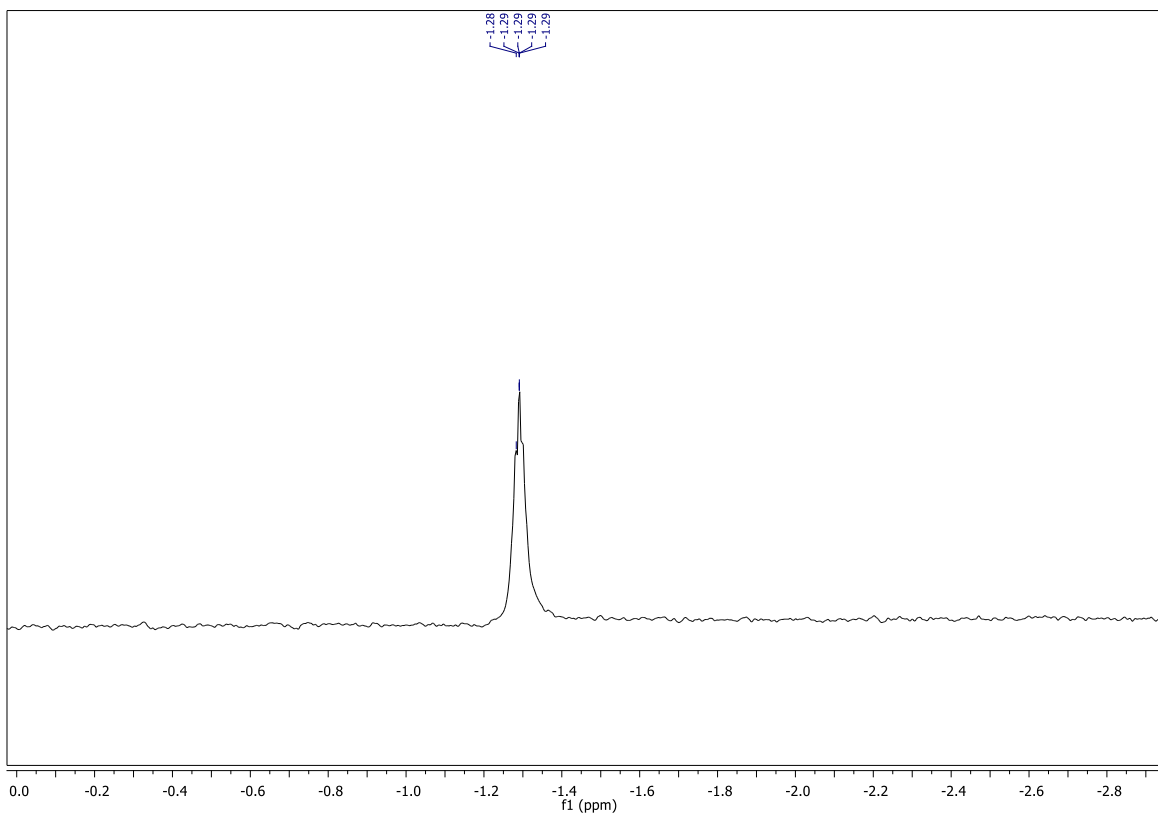

Figure S139.  $^{11}\text{B}$ NMR of Compound 32

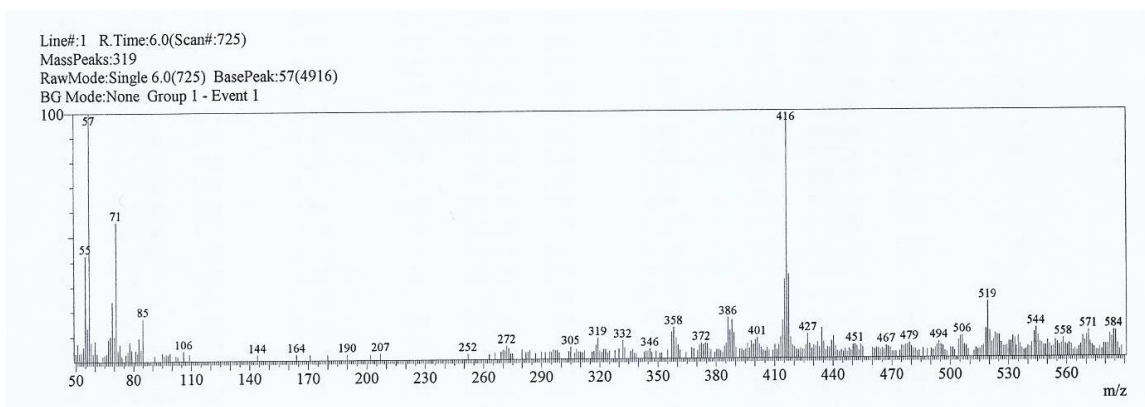

Figure S140. MS (ESI) of Compound 32

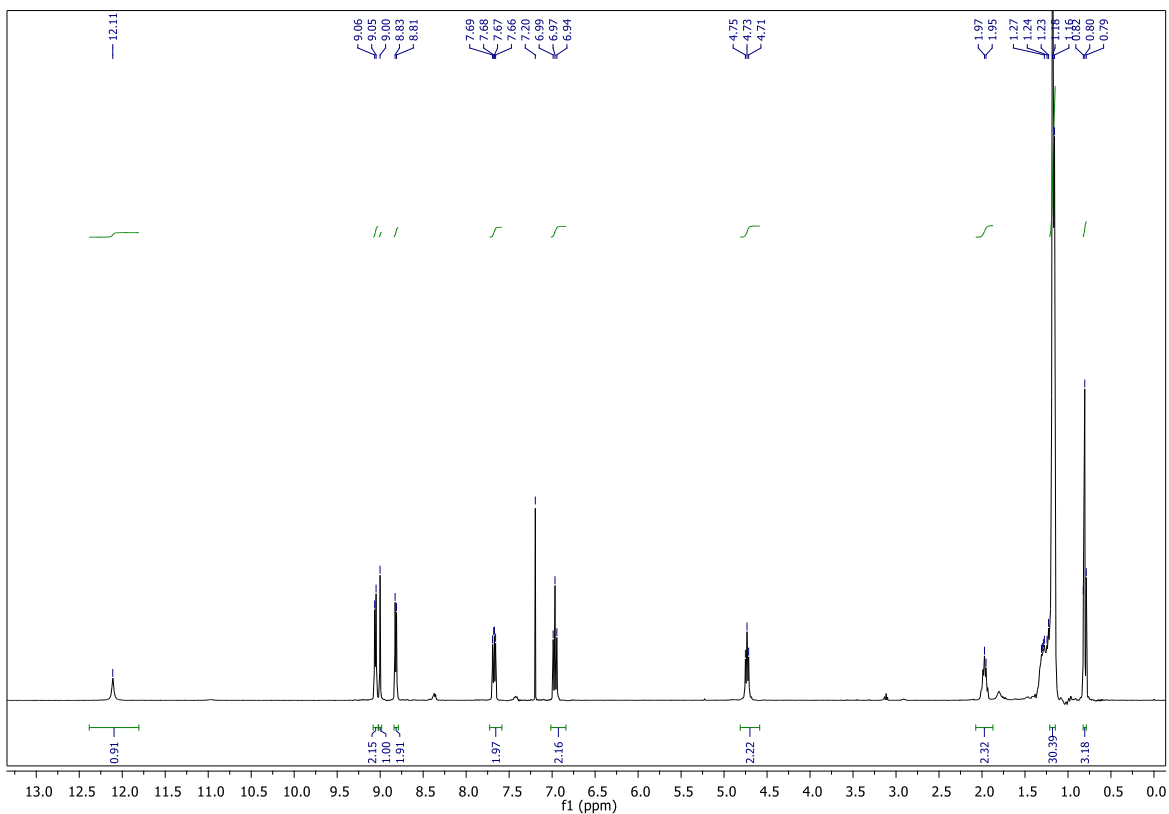

Figure S141. <sup>1</sup>H NMR of Compound 33

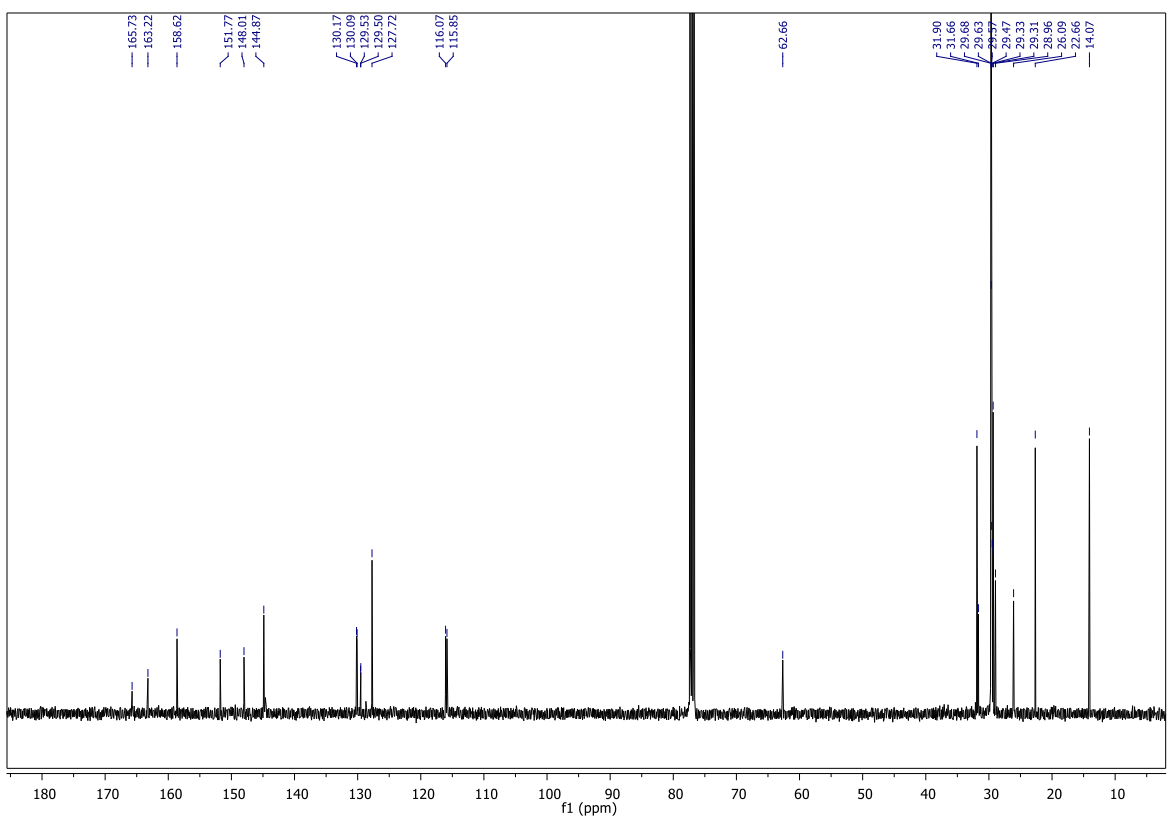

Figure S142. <sup>13</sup>C NMR of Compound 33

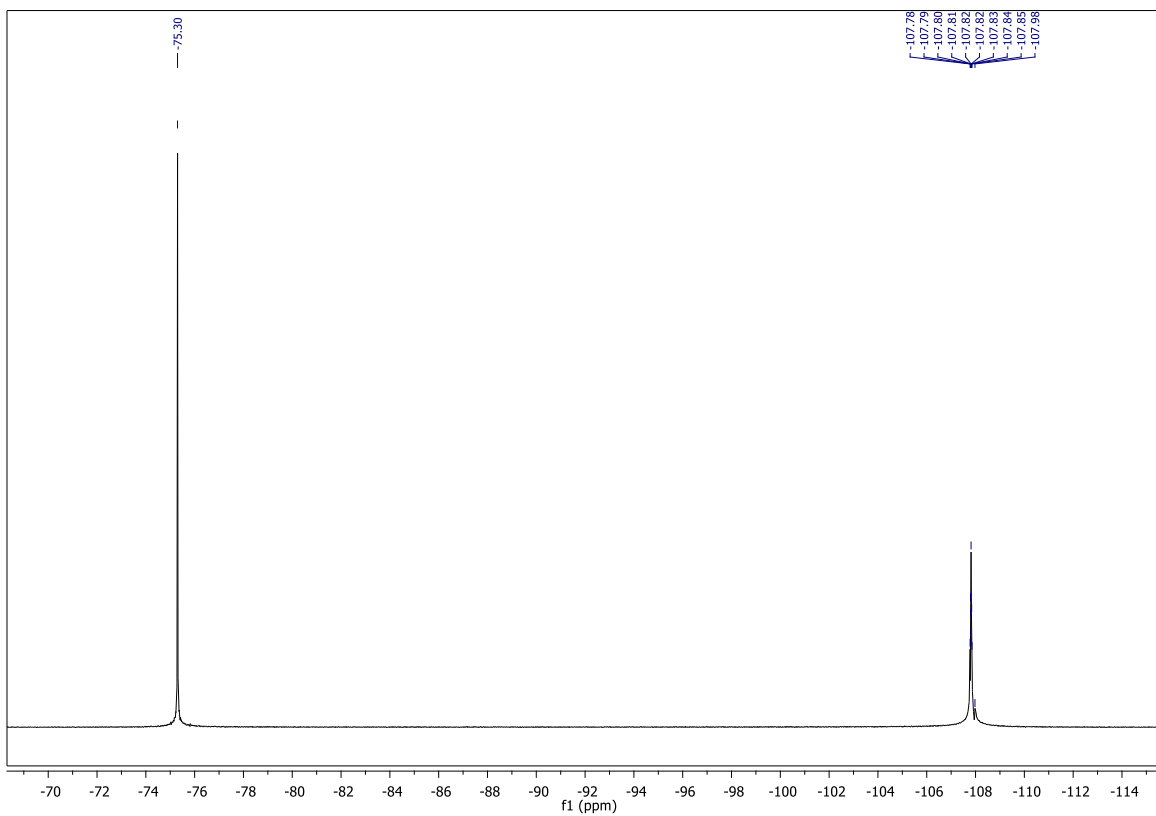

Figure S143.  $^{19}\text{F}$ NMR of Compound 33

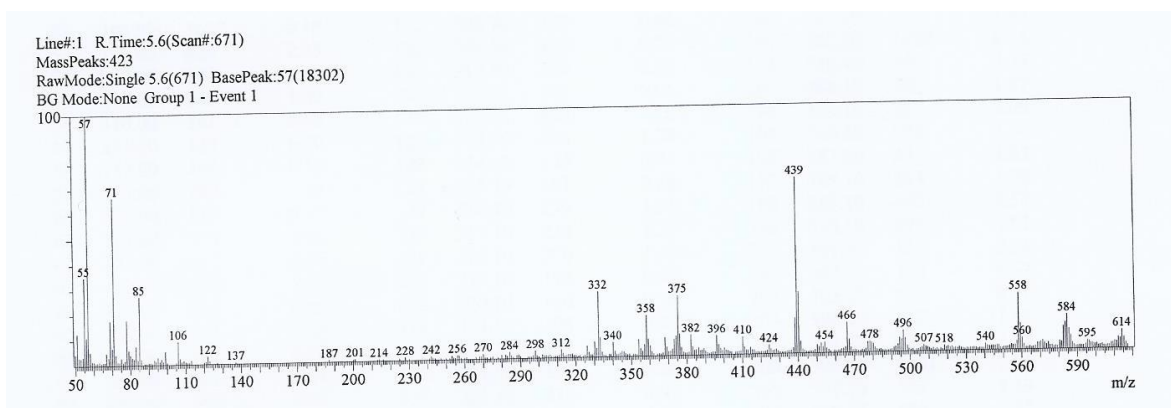

Figure S144. MS (ESI) of Compound 33
